# Supplementary material for: A record of Neogene seawater δ 11 B reconstructed from paired δ 11 B analyses on benthic and planktic foraminifera
Source: Copernicus journal article supplement (doi:10.5194/cp-13-149-2017), 2017-02-24
Supplement: Supplementary file 1 [file cp-13-149-2017-supplement.zip]

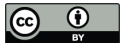

## *Supplement of*

# **A record of Neogene seawater $\delta^{11}\text{B}$ reconstructed from paired $\delta^{11}\text{B}$ analyses on benthic and planktic foraminifera**

**Rosanna Greenop et al.**

*Correspondence to:* Rosanna Greenop (rg200@st-andrews.ac.uk)

- cp-13-149-2017-supplement-title-page.pdf
- Supplementary table 1 revised BMC\_output\_GTS2012\_0.175\_flatprob.xlsx
- Supplementary table 2 revised BMC\_output\_GTS2012\_0.175\_flatprob\_IndividualMCmembers.xlsx

The copyright of individual parts of the supplement might differ from the CC-BY 3.0 licence.
