# Supplementary material for: A record of Neogene seawater δ 11 B reconstructed from paired δ 11 B analyses on benthic and planktic foraminifera
Source: Copernicus journal article supplement (doi:10.5194/cp-13-149-2017), 2017-02-24
Supplement: Supplementary file 1 [file Supplementary table 1 revised BMC_output_GTS2012_0.175_flatprob.xlsx]

## Sheet: Info
BoronMC model output for seawater boron isotopic composition, pH for the last 23 million years
References:
Greenop, R., Foster, G.L., Sosdian, S.M., Hain, M.P., Oliver, K.I.C., Goodwin, P., Chalk, T.B., Lear, C.H., Wilson, P.A. (submitted to Climate of the Past 2015) A record of Neogene seawater δ11B calculated from paired benthic and planktonic foraminiferal δ11B
Model scenario:
GTS2012	GTS (2012) age scale
0.175 slope with flat probability	Slope of the ∆pH/∆d13C relationship used to calculate the output compiled in this file (as described in Greenop et al., Climate of the Past)
Datasets:
Benthic/Planktic foram δ11B/δ13C		this study; Sosdian et al., (in prep); Foster et al. 2012; Martinez-Boti et al. 2015; Haug and Tiedemann 1998

## Sheet: Smoothed d11Bsw
Smoothed record of d11Bsw based on benthic/planktic data (Greenop et al., submitted to Climate of the Past)
We use Matlab built-in LOWESS smoothing with a parameter 0.7.
Age (Myr)	d11Bsw
	mean	median	max	min	stand. dev.	2.5% quantile	16.5% quantile	25% quantile	50% quantile	75% quantile	83.5% quantile	97.5% quantile
1e-06	39.755	39.762	40.06	39.204	0.10426	39.53	39.656	39.69	39.762	39.828	39.856	39.939
2e-06	39.755	39.762	40.06	39.204	0.10426	39.53	39.656	39.69	39.762	39.828	39.856	39.939
3e-06	39.755	39.762	40.06	39.204	0.10426	39.53	39.656	39.69	39.762	39.828	39.856	39.939
4e-06	39.755	39.762	40.06	39.204	0.10426	39.53	39.656	39.69	39.762	39.828	39.856	39.939
5e-06	39.755	39.762	40.06	39.204	0.10426	39.53	39.656	39.69	39.762	39.828	39.856	39.939
6e-06	39.755	39.762	40.06	39.204	0.10426	39.53	39.656	39.69	39.762	39.828	39.856	39.939
7e-06	39.755	39.762	40.06	39.204	0.10426	39.53	39.656	39.69	39.762	39.828	39.856	39.939
8e-06	39.755	39.762	40.06	39.204	0.10426	39.53	39.656	39.69	39.762	39.828	39.856	39.939
9e-06	39.755	39.762	40.06	39.204	0.10426	39.53	39.656	39.69	39.762	39.828	39.856	39.939
1e-05	39.755	39.762	40.06	39.204	0.10426	39.53	39.656	39.69	39.762	39.828	39.856	39.939
0.67965	39.854	39.859	40.175	39.343	0.10894	39.622	39.748	39.785	39.859	39.931	39.961	40.044
1.143	39.912	39.917	40.29	39.354	0.12157	39.659	39.795	39.833	39.917	39.999	40.032	40.13
1.1564	39.914	39.918	40.294	39.354	0.12202	39.659	39.796	39.834	39.918	40.001	40.035	40.133
1.161	39.915	39.919	40.295	39.354	0.12217	39.66	39.797	39.835	39.919	40.001	40.035	40.134
1.4488	39.948	39.951	40.364	39.355	0.13274	39.671	39.82	39.861	39.951	40.042	40.079	40.189
2.2739	40.026	40.032	40.599	39.255	0.16866	39.676	39.865	39.918	40.032	40.143	40.191	40.331
2.8691	40.066	40.074	40.746	39.117	0.19618	39.644	39.881	39.943	40.074	40.201	40.255	40.418
5.3735	39.951	39.973	40.947	38.467	0.30762	39.292	39.656	39.759	39.973	40.164	40.248	40.496
8.6819	38.804	38.827	39.837	37.416	0.32964	38.113	38.481	38.588	38.827	39.039	39.125	39.392
9.3346	38.578	38.601	39.658	37.089	0.3531	37.833	38.234	38.348	38.601	38.826	38.923	39.207
10.138	38.323	38.347	39.419	36.804	0.36156	37.561	37.97	38.088	38.347	38.578	38.68	38.966
11.623	38.033	38.052	39.108	36.541	0.37005	37.25	37.676	37.798	38.052	38.294	38.397	38.692
12.274	37.986	38.002	39.054	36.469	0.36777	37.209	37.633	37.752	38.002	38.248	38.35	38.641
12.799	37.971	37.985	39.038	36.48	0.35993	37.208	37.63	37.744	37.985	38.227	38.328	38.613
13.53	37.951	37.963	39.043	36.52	0.34848	37.216	37.617	37.73	37.963	38.199	38.295	38.579
16.389	37.842	37.855	39.105	35.806	0.35	37.121	37.501	37.614	37.855	38.08	38.181	38.49
17.69	37.798	37.814	39.136	35.427	0.37719	37.038	37.427	37.548	37.814	38.051	38.163	38.503
19.006	37.769	37.785	39.176	35.057	0.41885	36.924	37.354	37.493	37.785	38.053	38.177	38.561
19.667	37.755	37.769	39.196	34.871	0.44425	36.859	37.316	37.461	37.769	38.059	38.189	38.593
22.618	37.746	37.763	39.567	34.094	0.58464	36.572	37.179	37.358	37.763	38.148	38.324	38.856
22.983	37.749	37.763	39.654	34.001	0.60458	36.534	37.16	37.349	37.763	38.166	38.346	38.897
23.083	37.749	37.764	39.677	33.975	0.6101	36.523	37.156	37.346	37.764	38.17	38.353	38.909

## Sheet: B-P data
BoronMC model output for benthic/planktic data of Greenop et al. (submitted to Climate of the Past) using the smoothed d11Bsw record.
Surface ("planktic") solution:
Age (Myr)	pH	pH	pH	pH	pH	pH	pH	pH	pH	pH	pH	pH	d11Bsw	d11Bsw	d11Bsw	d11Bsw	d11Bsw	d11Bsw	d11Bsw	d11Bsw	d11Bsw	d11Bsw	d11Bsw	d11Bsw
	mean	median	max	min	stand. dev.	2.5% quantile	16.5% quantile	25% quantile	50% quantile	75% quantile	83.5% quantile	97.5% quantile	mean	median	max	min	stand. dev.	2.5% quantile	16.5% quantile	25% quantile	50% quantile	75% quantile	83.5% quantile	97.5% quantile
0.67965	8.1813	8.1811	8.2447	8.1227	0.017079	8.1481	8.1647	8.1698	8.1811	8.1925	8.1979	8.2156	39.854	39.859	40.175	39.343	0.10894	39.622	39.748	39.785	39.859	39.931	39.961	40.044
1.143	8.1568	8.1568	8.2342	8.0867	0.019751	8.118	8.1376	8.1434	8.1568	8.17	8.1758	8.1961	39.912	39.917	40.29	39.354	0.12157	39.659	39.795	39.833	39.917	39.999	40.032	40.13
1.1564	8.1281	8.128	8.1988	8.0507	0.017812	8.0934	8.1107	8.1159	8.128	8.14	8.1457	8.1633	39.914	39.918	40.294	39.354	0.12202	39.659	39.796	39.834	39.918	40.001	40.035	40.133
1.161	8.1886	8.1884	8.2623	8.1211	0.016859	8.1557	8.1724	8.1773	8.1884	8.1999	8.2049	8.222	39.915	39.919	40.295	39.354	0.12217	39.66	39.797	39.835	39.919	40.001	40.035	40.134
1.4488	8.1802	8.1802	8.2551	8.1015	0.019209	8.1428	8.1614	8.1672	8.1802	8.1932	8.199	8.218	39.948	39.951	40.364	39.355	0.13274	39.671	39.82	39.861	39.951	40.042	40.079	40.189
2.2739	8.0064	8.0062	8.1032	7.926	0.022444	7.963	7.9846	7.9914	8.0062	8.0212	8.0283	8.0513	40.026	40.032	40.599	39.255	0.16866	39.676	39.865	39.918	40.032	40.143	40.191	40.331
2.8691	8.0293	8.0291	8.127	7.9252	0.023826	7.9835	8.006	8.0131	8.0291	8.0447	8.0525	8.0768	40.066	40.074	40.746	39.117	0.19618	39.644	39.881	39.943	40.074	40.201	40.255	40.418
5.3735	7.9775	7.9767	8.1225	7.8414	0.035789	7.9102	7.9427	7.9532	7.9767	8.0013	8.0128	8.0494	39.951	39.973	40.947	38.467	0.30762	39.292	39.656	39.759	39.973	40.164	40.248	40.496
8.6819	7.9346	7.9338	8.1053	7.7775	0.042013	7.8534	7.8935	7.9058	7.9338	7.9628	7.9754	8.0178	38.804	38.827	39.837	37.416	0.32964	38.113	38.481	38.588	38.827	39.039	39.125	39.392
9.3346	7.974	7.9734	8.1374	7.8333	0.038703	7.901	7.9357	7.9474	7.9734	7.9998	8.0122	8.0505	38.578	38.601	39.658	37.089	0.3531	37.833	38.234	38.348	38.601	38.826	38.923	39.207
10.138	8.1143	8.1131	8.2528	8.0089	0.033121	8.0531	8.0816	8.0911	8.1131	8.1365	8.1469	8.1825	38.323	38.347	39.419	36.804	0.36156	37.561	37.97	38.088	38.347	38.578	38.68	38.966
11.623	7.9869	7.9863	8.1398	7.848	0.039466	7.9125	7.9485	7.96	7.9863	8.013	8.0252	8.0661	38.033	38.052	39.108	36.541	0.37005	37.25	37.676	37.798	38.052	38.294	38.397	38.692
12.274	8.095	8.0945	8.2358	7.9858	0.034445	8.0304	8.0607	8.071	8.0945	8.1177	8.1285	8.1655	37.986	38.002	39.054	36.469	0.36777	37.209	37.633	37.752	38.002	38.248	38.35	38.641
12.799	8.0373	8.0364	8.1972	7.9134	0.035413	7.9704	8.0024	8.0128	8.0364	8.0613	8.072	8.1079	37.971	37.985	39.038	36.48	0.35993	37.208	37.63	37.744	37.985	38.227	38.328	38.613
13.53	8.0058	8.005	8.1582	7.8749	0.036481	7.937	7.9705	7.9805	8.005	8.0299	8.0418	8.079	37.951	37.963	39.043	36.52	0.34848	37.216	37.617	37.73	37.963	38.199	38.295	38.579
16.389	8.0415	8.041	8.2144	7.8874	0.034201	7.9757	8.0079	8.0185	8.041	8.0647	8.0745	8.1101	37.842	37.855	39.105	35.806	0.35	37.121	37.501	37.614	37.855	38.08	38.181	38.49
17.69	8.0752	8.0749	8.235	7.9491	0.035058	8.008	8.0412	8.0512	8.0749	8.0986	8.1094	8.1448	37.798	37.814	39.136	35.427	0.37719	37.038	37.427	37.548	37.814	38.051	38.163	38.503
19.006	7.9814	7.9812	8.1817	7.8187	0.043685	7.8955	7.9393	7.9522	7.9812	8.0109	8.0242	8.067	37.769	37.785	39.176	35.057	0.41885	36.924	37.354	37.493	37.785	38.053	38.177	38.561
19.667	8.1444	8.1438	8.3588	8.0061	0.038159	8.0707	8.1073	8.1185	8.1438	8.1701	8.1819	8.2187	37.755	37.769	39.196	34.871	0.44425	36.859	37.316	37.461	37.769	38.059	38.189	38.593
22.618	7.9928	7.9932	8.2998	7.7941	0.057768	7.8781	7.9362	7.9546	7.9932	8.0315	8.0485	8.1032	37.746	37.763	39.567	34.094	0.58464	36.572	37.179	37.358	37.763	38.148	38.324	38.856
22.983	8.1474	8.1472	8.4188	7.9736	0.049774	8.0489	8.0992	8.1139	8.1472	8.1813	8.1965	8.2437	37.749	37.763	39.654	34.001	0.60458	36.534	37.16	37.349	37.763	38.166	38.346	38.897
23.083	8.0775	8.0776	8.3815	7.8728	0.055161	7.9672	8.0238	8.0405	8.0776	8.1148	8.1318	8.1845	37.749	37.764	39.677	33.975	0.6101	36.523	37.156	37.346	37.764	38.17	38.353	38.909
Bottom water ("benthic") solution:
Age (Myr)	pH	pH	pH	pH	pH	pH	pH	pH	pH	pH	pH	pH	d11Bsw	d11Bsw	d11Bsw	d11Bsw	d11Bsw	d11Bsw	d11Bsw	d11Bsw	d11Bsw	d11Bsw	d11Bsw	d11Bsw
	mean	median	max	min	stand. dev.	2.5% quantile	16.5% quantile	25% quantile	50% quantile	75% quantile	83.5% quantile	97.5% quantile	mean	median	max	min	stand. dev.	2.5% quantile	16.5% quantile	25% quantile	50% quantile	75% quantile	83.5% quantile	97.5% quantile
0.67965	7.982	7.9821	8.066	7.8993	0.022075	7.9394	7.9604	7.9668	7.9821	7.9971	8.0033	8.0253	39.854	39.859	40.175	39.343	0.10894	39.622	39.748	39.785	39.859	39.931	39.961	40.044
1.143	7.8197	7.8196	7.9365	7.6823	0.03082	7.7593	7.79	7.7988	7.8196	7.8409	7.85	7.8789	39.912	39.917	40.29	39.354	0.12157	39.659	39.795	39.833	39.917	39.999	40.032	40.13
1.1564	7.9625	7.962	8.0735	7.871	0.023016	7.9184	7.94	7.9464	7.962	7.978	7.9851	8.0073	39.914	39.918	40.294	39.354	0.12202	39.659	39.796	39.834	39.918	40.001	40.035	40.133
1.161	7.9447	7.9448	8.0454	7.8563	0.024587	7.8968	7.9207	7.9281	7.9448	7.9612	7.9685	7.9931	39.915	39.919	40.295	39.354	0.12217	39.66	39.797	39.835	39.919	40.001	40.035	40.134
1.4488	7.867	7.8672	7.9909	7.745	0.030203	7.8074	7.8376	7.8469	7.8672	7.8873	7.8965	7.9249	39.948	39.951	40.364	39.355	0.13274	39.671	39.82	39.861	39.951	40.042	40.079	40.189
2.2739	7.824	7.8241	7.9561	7.6993	0.033417	7.758	7.7913	7.8021	7.8241	7.8468	7.8562	7.8901	40.026	40.032	40.599	39.255	0.16866	39.676	39.865	39.918	40.032	40.143	40.191	40.331
2.8691	7.6794	7.6797	7.8257	7.4781	0.043447	7.5937	7.6379	7.6509	7.6797	7.7082	7.7213	7.7639	40.066	40.074	40.746	39.117	0.19618	39.644	39.881	39.943	40.074	40.201	40.255	40.418
5.3735	7.7458	7.7452	7.9537	7.5497	0.049717	7.6506	7.6972	7.7118	7.7452	7.7794	7.7948	7.844	39.951	39.973	40.947	38.467	0.30762	39.292	39.656	39.759	39.973	40.164	40.248	40.496
8.6819	7.8986	7.8973	8.0589	7.7501	0.041167	7.821	7.8589	7.8704	7.8973	7.9259	7.9389	7.9804	38.804	38.827	39.837	37.416	0.32964	38.113	38.481	38.588	38.827	39.039	39.125	39.392
9.3346	7.8242	7.8236	7.9889	7.6624	0.048403	7.7323	7.7769	7.7914	7.8236	7.857	7.8715	7.9208	38.578	38.601	39.658	37.089	0.3531	37.833	38.234	38.348	38.601	38.826	38.923	39.207
10.138	7.7628	7.7651	7.9738	7.487	0.065939	7.6273	7.6993	7.7197	7.7651	7.8084	7.8264	7.8854	38.323	38.347	39.419	36.804	0.36156	37.561	37.97	38.088	38.347	38.578	38.68	38.966
11.623	7.8396	7.8391	8.0321	7.624	0.054485	7.7314	7.7871	7.8031	7.8391	7.8774	7.8931	7.9465	38.033	38.052	39.108	36.541	0.37005	37.25	37.676	37.798	38.052	38.294	38.397	38.692
12.274	7.8148	7.8147	8.0131	7.6325	0.05358	7.7111	7.7624	7.7783	7.8147	7.8509	7.8668	7.9201	37.986	38.002	39.054	36.469	0.36777	37.209	37.633	37.752	38.002	38.248	38.35	38.641
12.799	7.7623	7.7636	7.997	7.5174	0.067219	7.6272	7.6962	7.7165	7.7636	7.8083	7.828	7.8908	37.971	37.985	39.038	36.48	0.35993	37.208	37.63	37.744	37.985	38.227	38.328	38.613
13.53	7.763	7.7637	7.9582	7.5531	0.054657	7.6561	7.7087	7.7252	7.7637	7.8002	7.8161	7.8694	37.951	37.963	39.043	36.52	0.34848	37.216	37.617	37.73	37.963	38.199	38.295	38.579
16.389	7.7893	7.7897	8.0381	7.6054	0.051048	7.686	7.7401	7.7552	7.7897	7.8239	7.8392	7.8872	37.842	37.855	39.105	35.806	0.35	37.121	37.501	37.614	37.855	38.08	38.181	38.49
17.69	7.8512	7.8515	8.0922	7.6591	0.048862	7.7563	7.8032	7.8183	7.8515	7.8848	7.8987	7.9465	37.798	37.814	39.136	35.427	0.37719	37.038	37.427	37.548	37.814	38.051	38.163	38.503
19.006	7.8944	7.8943	8.1827	7.7142	0.050131	7.7939	7.8463	7.8614	7.8943	7.9286	7.9441	7.9899	37.769	37.785	39.176	35.057	0.41885	36.924	37.354	37.493	37.785	38.053	38.177	38.561
19.667	7.9484	7.9484	8.1684	7.7322	0.050341	7.8481	7.8995	7.9147	7.9484	7.9819	7.9977	8.0447	37.755	37.769	39.196	34.871	0.44425	36.859	37.316	37.461	37.769	38.059	38.189	38.593
22.618	7.8994	7.9013	8.2535	7.6568	0.06802	7.7601	7.8324	7.8546	7.9013	7.946	7.9657	8.0269	37.746	37.763	39.567	34.094	0.58464	36.572	37.179	37.358	37.763	38.148	38.324	38.856
22.983	7.8565	7.8593	8.2013	7.4835	0.082481	7.6843	7.7777	7.8036	7.8593	7.9135	7.9364	8.0071	37.749	37.763	39.654	34.001	0.60458	36.534	37.16	37.349	37.763	38.166	38.346	38.897
23.083	7.904	7.9062	8.2422	7.5976	0.07109	7.7575	7.8346	7.8573	7.9062	7.9527	7.9729	8.0367	37.749	37.764	39.677	33.975	0.6101	36.523	37.156	37.346	37.764	38.17	38.353	38.909
