# Supplementary material for: A record of Neogene seawater δ 11 B reconstructed from paired δ 11 B analyses on benthic and planktic foraminifera
Source: Copernicus journal article supplement (doi:10.5194/cp-13-149-2017), 2017-02-24
Supplement: Supplementary file 2 [file Supplementary table 2 revised BMC_output_GTS2012_0.175_flatprob_IndividualMCmembers.xlsx]

## Sheet: Info
Individual 10000 BoronMC model output for seawater boron isotopic composition for the last 23 million years
References:
Greenop, R., Foster, G.L., Sosdian, S.M., Hain, M.P., Oliver, K.I.C., Goodwin, P., Chalk, T.B., Lear, C.H., Wilson, P.A. (submitted to Climate of the Past 2015) A record of Neogene seawater δ11B calculated from paired benthic and planktonic foraminiferal δ11B
Model scenario:
GTS2012	GTS (2012) age scale
0.175 slope with flat probability	Slope of the ∆pH/∆d13C relationship used to calculate the output compiled in this file (as described in Greenop et al., Climate of the Past)
Datasets:
Benthic/Planktic foram δ11B/δ13C		this study; Sosdian et al., (in prep); Foster et al. 2012; Martinez-Boti et al. 2015; Haug and Tiedemann 1998
Notes:
Individual Monte Carlo simulations output for each benthic-planktic pair.
Every column represents one B-P-couple
If the value is NaN than that means that the specific MC member did not have a solution

## Sheet: RESULTS_MCmember_d11B_BMCinput_
Age	0.67965	1.143	1.1564	1.161	1.4488	2.2739	2.8691	5.3735	8.6819	9.3346	10.138	11.623	12.274	12.799	13.53	16.389	17.69	19.006	19.667	22.618	22.983	23.083
	40.621	36.884	41.703	40.727	40.772	41.412	39.713	40.853	41.887	40.864	36.003	40.335	37.72	37.838	36.829	36.499	37.545	41.216	40.144	40.405	35.629	38.038
	39.417	39.111	41.877	40.194	40.085	41.239	40.348	40.265	42.153	40.018	38.014	40.157	37.185	37.829	38.085	35.743	37.852	41.943	39.838	39.662	36.967	38.965
	39.705	39.306	42.051	41.14	40.623	41.792	38.779	40.525	41.998	41.091	36.518	39.962	35.696	37.309	37.04	35.37	37.256	41.581	40.545	36.165	NaN	38.595
	39.831	38.197	42.417	40.325	41.306	41.834	39.7	39.496	42.345	40.733	33.649	40.366	33.668	37.744	36.749	36.628	37.934	41.017	40.385	37.95	35.187	38.032
	39.672	38.228	41.588	39.809	41.391	41.113	40.28	40.141	42.017	41.187	38.58	40.332	37.533	37.087	38.014	34.206	37.136	41.533	40.044	40.039	NaN	39.81
	40.461	39.448	40.938	41.265	39.983	41.249	39.781	39.924	42.25	41.049	36.935	40.62	35.746	37.576	36.71	37.606	35.707	40.421	40.072	40.229	NaN	39.26
	38.639	38.387	41.792	39.265	39.795	41.425	40.533	40.844	42.291	39.102	36.869	40.306	36	37.64	38.003	37.788	38.345	40.977	41.135	36.563	35.213	38.598
	39.605	39.195	40.909	40.723	40.133	41.868	39.119	40.152	41.277	39.122	31.641	40.961	35.238	37.784	38.482	36.677	34.717	41.61	40.178	39.549	35.546	37.336
	41.127	39.461	40.854	41.401	40.532	41.416	39.606	40.82	42.374	40.752	37.732	40.13	37.16	37.318	36.132	36.758	37.726	40.888	40.62	39.204	NaN	39.22
	39.329	39.356	41.913	40.3	40.735	40.704	39.532	40.046	NaN	40.597	36.629	40.131	36.022	37.617	36.418	35.526	37.422	41.945	39.588	38.93	NaN	39.462
	40.148	39.496	41.27	38.572	40.458	42.019	39.804	40.565	41.543	39.417	37.892	41.14	37.857	35.776	36.976	37.03	37.634	41.638	40.561	39.417	37.673	38.751
	39.613	36.43	41.15	41.017	40.727	40.698	39.684	39.316	NaN	40.198	36.563	39.444	35.535	37.849	33.91	37.327	36.219	40.917	39.994	39.797	31.638	39.281
	38.908	39.535	41.647	40.641	40.494	41.078	40.637	40.106	42.037	39.349	37.001	41.138	37.158	36.607	NaN	36.103	36.397	41.409	40.635	39.074	33.566	38.918
	40.801	39.171	42.084	41.073	41.115	41.952	40.028	40.446	42.001	39.668	36.45	40.687	32.997	37.116	38.032	35.498	37.233	40.898	39.977	40.554	34.995	39.348
	39.975	38.023	41.372	39.785	40.368	41.775	39.881	40.846	42.741	40.182	32.949	39.307	36.425	37.474	37.388	36.396	34.1	41.389	39.532	36.105	NaN	38.944
	40.499	38.549	42.006	40.984	41.055	41.453	38.985	40.063	43.07	40.518	35.375	40.74	32.839	36.614	37.811	30.413	37.941	39.971	40.16	39.744	36.766	40.416
	39.963	39.658	41.394	40.259	39.518	41.706	40.083	40.373	42.439	40.092	NaN	40.225	37.748	38.055	37.762	33.485	38.106	40.417	40.067	37.817	NaN	39.308
	39.428	37.74	41.544	38.668	39.736	41.59	40.178	40.104	42.739	41.202	37.379	40.135	36.08	37.834	35.43	35.172	35.13	40.994	40.792	39.912	36.349	38.481
	36.864	39.002	40.72	40.05	40.735	42.034	40.273	39.872	42.42	39.846	38.12	40.168	34.929	37.745	37.373	34.611	38.408	41.008	40.712	38.504	36.251	39.318
	40.666	37.677	42.021	40.286	40.95	41.912	40.245	40.899	42.086	40.822	38.094	40.482	36.673	37.956	36.665	37.412	37.811	41.029	40.038	39.928	NaN	37.836
	37.697	39.445	41.892	39.898	40.568	41.385	39.61	38.091	42.629	40.045	37.815	40.415	35.876	37.27	36.357	34.642	36.968	41.596	40.101	39.783	NaN	38.383
	39.683	38.242	41.805	40.263	41.165	41.997	39.861	40.113	42.089	39.897	36.855	40.363	NaN	37.247	36.75	35.642	36.742	41.025	39.299	39.423	37.464	39.465
	41.207	38.334	41.205	39.336	39.284	41.49	40.209	40.868	42.281	40.957	37.316	40.215	32.994	37.181	37.593	34.444	35.424	41.757	39.66	39.146	35.005	39.393
	40.63	37.662	41.151	38.194	40.334	42.015	38.967	41.315	42.665	40.519	35.659	40.054	37.063	37.665	33.437	35.302	37.317	40.829	40.308	39.983	NaN	37.031
	40.83	37.431	42.054	40.045	40.446	40.955	40.344	40.81	41.719	40.848	35.545	40.373	36.097	36.631	37.342	37.204	34.405	40.838	40.731	37.581	31.46	40.461
	40.403	39.364	42.708	40.619	40.579	42.648	40.283	38.192	42.441	39.987	37.396	39.871	34.676	37.05	37.145	35.173	38.511	40.693	39.973	38.241	NaN	38.714
	40.931	38.557	41.6	39.281	41.178	41.711	38.933	40.648	42.146	40.645	37.436	40.088	37.531	38.3	35.924	NaN	38.148	41.063	40.251	40.587	33.352	40.379
	40.197	37.699	41.131	39.093	39.932	40.767	38.958	39.712	41.966	40.46	36.139	39.197	36.905	35.401	36.398	36.205	37.063	41.283	40.869	40.5	NaN	38.947
	40.386	38.56	41.925	38.768	40.464	41.626	39.809	40.759	NaN	40.391	38.488	40.77	33.623	35.508	38.417	37.545	37.925	40.695	40.872	40.895	NaN	39.042
	39.996	38.594	41.973	38.34	41.235	41.03	40.05	39.145	41.498	39.31	36.742	40.041	NaN	35.987	36.362	38.25	36.861	41.542	39.664	38.784	NaN	38.626
	38.011	36.587	41.965	39.557	39.44	41.594	40.452	40.58	42.25	40.114	37.114	40.283	32.463	37.222	32.83	37.828	35.727	41.579	40.452	38.529	32.097	36.999
	39.971	39.426	41.734	39.647	40.784	41.92	40.202	41.095	42.614	40.17	32.2	39.61	34.061	36.056	33.401	36.258	38.977	41.404	39.831	38.473	NaN	39.42
	40.526	38.562	42.194	40.641	41.15	41.588	39.712	41.203	41.945	41.097	36.812	40.109	38.132	38.387	37.71	34.538	35.931	41.28	40.97	40.832	37.461	38.911
	41.253	39.327	41.338	39.026	39.666	42.475	39.199	40.906	41.573	40.552	37.114	40.007	34.493	36.985	36.895	35.203	36.672	40.974	40.929	41.306	34.869	39.193
	40.165	39.191	42.12	39.754	40.339	41.251	38.761	40.952	42.833	39.916	36.627	40.396	35.291	37.356	37.035	38.372	38.304	41.089	41.257	38.042	NaN	40.638
	40.416	39.008	40.818	39.828	40.809	41.132	40.098	40.262	41.201	40.382	37.521	40.711	NaN	36.73	37.058	38.31	37.276	40.879	40.763	40.457	NaN	37.019
	39.551	37.909	40.498	41.451	40.791	41.54	40.121	40.984	41.787	40.944	35.429	40.5	35.825	35.925	38.072	35.931	36.352	41.571	40.37	40.259	32.139	40.453
	38.211	39.701	42.241	38.782	41.209	41.998	40.244	40.649	42.492	39.513	36.18	39.276	33.503	38.287	33.066	35.532	38.785	40.539	41.093	38.957	32.412	39.53
	38.352	39.392	40.488	41.301	41.004	41.462	39.488	40.989	42.554	40.391	NaN	40.228	36.367	37.485	36.586	33.85	38.319	40.48	40.379	39.868	37.474	40.288
	40.728	39.516	41.011	39.629	40.667	41.436	40.238	40.339	41.569	40.625	37.807	41.04	36.538	37.584	38.538	35.993	37.802	41.336	40.569	40.223	NaN	39.452
	40.085	40.094	41.971	41.084	41.083	41.685	39.619	40.861	41.957	40.036	34.855	40.339	34.63	36.638	36.712	35.626	37.164	40.606	40.4	39.014	33.389	39.075
	40.111	37.977	42.159	40.576	40.044	41.471	39.813	41.778	41.764	40.717	35.766	41.105	37.676	38.113	37.161	38.538	38.108	40.947	40.683	38.809	NaN	38.373
	39.242	39.615	42.261	41.235	41.105	41.908	39.77	41.39	42.662	41.039	37.111	39.75	32.814	36.163	37.077	36.476	36.745	41.107	40.497	39.696	NaN	40.457
	37.939	36.694	40.762	39.86	40.502	42.176	39.361	38.852	42.541	40.082	33.971	40.987	NaN	37.245	35.814	33.83	36.721	41.114	40.538	40.683	NaN	39.517
	39.901	38.556	42.006	38.726	40.214	41.991	39.737	41.028	NaN	40.546	35.467	40.778	33.838	37.062	35.556	36.838	38.745	41.079	40.128	40.645	33.022	37.139
	40.731	39.394	40.151	40.111	39.927	41.609	38.482	41.025	NaN	40.016	35.223	41.124	36.986	38.309	37.483	32.424	38.818	40.656	40.392	39.69	32.066	39.632
	39.533	37.908	41.782	40.356	40.806	41.495	39.918	39.815	42.112	40.295	37.06	39.681	38.197	37.783	37.264	36.968	36.622	41.379	39.848	41.15	NaN	39.062
	39.792	38.529	41.844	38.898	40.398	42.012	39.991	40.743	42.32	40.723	34.973	40.61	38.386	36.755	35.372	35.722	35.986	41.312	39.886	40.257	NaN	40.743
	38.684	40.068	41.956	39.837	40.558	41.795	39.304	40.35	41.494	40.028	35.636	40.099	33.567	37.95	36.34	34.844	37.265	41.218	40.486	40.762	NaN	39.113
	40.667	37.379	41.519	40.484	40.222	41.748	40.146	40.398	42.601	40.857	38.015	39.874	35.993	37.52	36.267	37.858	38.975	39.796	41.357	39.946	NaN	36.938
	40.17	37.758	41.969	40.886	40.735	41.926	39.637	40.959	42.977	39.926	NaN	40.434	37.519	37.315	38.534	35.541	36.957	41.797	40.396	36.189	NaN	38.621
	39.573	37.638	42.169	40.759	40.226	40.744	39.705	40.776	42.414	39.457	36.548	40.1	31.719	37.683	NaN	38.043	36.055	41.314	40.282	38.85	NaN	37.91
	38.89	37.901	41.006	39.242	40.86	41.242	40.357	40.118	43.038	40.788	37.179	39.975	37.642	35.679	38.85	36.574	38.581	41.547	41.093	39.692	NaN	39.917
	38.324	39.716	41.62	39.464	40.842	41.51	40.076	40.146	42.606	40.75	37.37	41.162	37.051	37.874	38.474	38.141	38.403	40.909	40.932	38.715	32.853	38.209
	39.193	39.073	41.95	40.883	39.518	41.724	38.545	40.411	41.065	40.989	38.671	40.071	37.314	36.638	34.987	34.934	35.949	40.053	39.462	38.761	NaN	40.035
	40.962	38.527	41.275	39.939	40.657	41.382	38.844	39.672	42.437	40.385	36.516	39.522	36.511	38.193	37.083	36.607	36.523	41.559	40.253	39.6	NaN	38.324
	39.378	39.1	41.774	40.197	40.218	40.972	40.069	40.542	41.931	40.355	36.673	40.577	31.591	37.868	33.349	36.781	34.629	41.325	40.747	40.595	36.748	39.582
	39.912	39.707	41.075	40.148	40.855	41.694	40.103	40.933	42.788	40.776	38.343	41.084	NaN	37.438	36.45	35.32	38.433	40.679	40.591	39.973	NaN	37.048
	40.296	39.131	41.677	39.81	40.56	41.262	40.126	40.455	40.526	39.996	32.065	41.297	34.614	37.596	35.604	33.881	37.254	41.12	39.248	39.077	31.725	39.47
	39.406	38.214	42.364	39.942	40.429	42.163	40.501	41.489	42.568	39.755	34.841	40.02	34.286	37.068	35.739	38.348	38.444	41.304	40.535	39.112	33.302	39.218
	38.996	37.811	41.158	39.655	40.389	41.342	39.93	41.053	42.423	40.672	36.975	40.236	37.866	38.071	34.466	36.915	37.156	41.283	40.22	39.591	NaN	40.583
	40.231	37.182	41.341	39.795	40.341	41.567	39.353	40.604	42.139	40.88	34.154	40.309	35.057	37.438	37.948	34.192	37.378	41.817	39.87	39.794	35.94	36.553
	39.419	38.935	42.218	40.281	40.031	41.037	40.185	39.886	42.403	40.811	38.553	40.649	33.72	38.173	36.48	37.936	35.021	40.965	41.528	39.778	NaN	38.769
	38.613	39.649	42.129	40.012	40.096	41.388	40.182	40.438	42.334	40.73	36.318	40.928	37.727	37.628	36.079	37.733	36.718	42.086	41.095	38.443	38.715	39.572
	40.318	38.924	41.708	40.888	40.935	40.964	40.471	39.293	41.995	40.69	37.147	39.853	37.524	38.68	36.676	34.974	38.034	40.695	40.467	39.363	36.161	39.524
	39.727	39.7	42.098	38.738	40.719	41.613	39.941	40.433	41.962	40.079	37.741	40.704	35.465	36.98	35.54	33.624	38.489	39.638	39.889	40.67	NaN	40.076
	37.824	38.689	41.704	39.587	39.992	41.522	40.296	39.226	42.118	41.378	37.798	40.955	37.363	36.425	37.234	37.298	34.774	40.792	40.243	37.142	NaN	40.342
	39.897	38.533	41.351	38.369	40.678	41.476	39.705	39.128	42.21	39.073	36.264	40.777	34.664	37.378	33.948	38.402	35.332	41.586	39.972	39.881	36.482	38.434
	40.441	37.881	41.902	40.647	39.928	41.938	40.933	39.25	42.868	39.665	35.851	41.099	35.89	37.375	36.008	34.302	36.561	41.067	39.552	39.289	33.068	39.27
	39.981	38.806	42.235	41.212	40.76	41.847	40.027	40.766	41.579	40.975	37.064	40.677	33.686	37.181	35.939	37.669	38.606	41.496	39.963	39.366	35.053	39.232
	41.126	38.709	40.756	39.472	41.348	41.85	40.533	40.811	42.433	39.606	38.219	40.211	35.725	37.012	35.933	37.667	37.32	41.606	39.736	40.617	NaN	38.626
	40.578	38.02	41.929	40.296	40.8	41.836	40.578	41.275	42.631	40.584	35.998	40.445	34.337	37.561	38.285	38.909	38.702	41.02	39.094	39.058	NaN	39.369
	39.793	37.666	41.541	39.916	39.858	40.712	38.778	40.392	42.822	41.082	36.146	40.274	32.104	36.862	37.099	34.941	37.621	41.18	40.118	40.002	32.551	39.904
	40.907	38.954	41.587	39.838	40.876	41.64	40.052	40.054	42.713	39.394	36.371	40.627	35.494	37.942	35.675	37.068	37.99	41.105	40.811	40.533	NaN	39.722
	38.63	37.316	41.747	40.586	40.187	42.117	39.498	40.061	42.036	40.008	33.013	40.06	35.28	37.786	35.832	34.086	37.673	41.702	39.862	39.844	37.224	40.339
	40.606	38.035	41.005	41.201	40.649	40.778	39.001	41.523	42.468	40.403	37.769	40.56	37.294	36.941	37.476	37.714	39.431	40.157	40.955	40.536	NaN	38.683
	40.365	37.557	41.186	40.479	40.603	41.812	40.091	40.888	42.086	40.674	35.135	39.892	35.021	37.545	37.928	37.08	37.372	41.605	39.598	39.266	NaN	39.71
	39.793	35.54	42.036	40.243	40.898	41.848	40.192	40.089	42.781	40.682	37.301	40.177	37.572	36.751	37.089	37.448	38.583	40.446	39.606	39.239	34.745	39.348
	38.784	39.249	40.636	40.472	40.894	41.213	38.888	41.336	41.81	40.455	35.443	39.823	37.812	37.621	35.011	38.124	35.171	41.233	39.785	39.666	32.627	39.525
	40.083	36.728	41.804	39.689	40.283	41.705	40.224	41.388	42.79	39.713	36.525	40.769	35.179	37.247	37.521	36.56	38.647	40.683	39.681	39.429	NaN	38.813
	39.539	39.401	41.472	41.19	39.856	41.483	39.615	39.965	41.815	39.281	33.569	40.156	35.153	37.827	38.354	38.201	37.442	40.657	41.018	39.048	NaN	38.646
	39.374	38.769	41.931	40.743	41.198	42.25	40.319	40.948	42.71	40.161	34.825	40.236	33.07	37.382	38.199	38.152	35.672	41.122	41.377	39.897	NaN	40.409
	40.944	38.84	41.235	39.965	40.183	41.148	40.219	38.523	42.579	39.74	34.413	40.465	NaN	37.218	39.043	35.253	38.238	41.29	40.258	40.503	35.404	38.913
	39.115	38.02	41.874	40.748	39.602	42.028	39.758	40.679	42.712	40.665	35.345	39.88	35.259	37.967	34.501	36.795	38.599	40.76	39.938	40.62	33.204	39.287
	40.024	39.086	41.848	39.169	40.058	41.585	39.776	40.403	41.871	40.368	38.801	39.178	36.204	37.887	37.047	37.485	38.307	41.56	39.655	40.967	36.138	38.666
	40.949	38.706	42.126	39.43	40.613	41.44	39.552	39.92	42.896	40.939	37.794	40.588	31.367	37.571	37.937	34.473	38.277	41.583	41.027	41.113	36.763	39.783
	39.099	39.415	41.469	40.019	40.639	41.582	39.003	40.972	42.114	38.909	37.403	40.648	37.016	37.49	35.797	36.092	37.898	40.975	41.237	37.419	NaN	40.508
	41.191	38.366	40.864	39.833	40.997	41.128	38.858	40.486	43.1	40.376	37.791	40.635	NaN	38.336	36.031	37.037	NaN	40.389	41.09	40.793	35.69	38.281
	39.609	38.615	41.477	40.598	40.923	42.07	40.377	40.073	41.615	40.26	36.098	40.356	38.292	37.923	38.167	37.223	35.54	40.828	39.84	40.557	35.78	38.948
	40.14	37.589	41.811	38.913	40.94	41.717	39.528	41.283	42.615	39.919	37.481	40.378	NaN	36.765	38.699	37.035	36.293	40.962	40.327	39.239	35.04	39.806
	38.262	38.831	42.051	41.143	40.408	42.043	40.719	40.338	42.487	40.599	34.773	40.412	37.765	38.433	35.856	36.643	37.054	40.822	39.809	39.141	NaN	36.119
	37.718	39.071	40.729	39.281	41.819	41.824	39.328	41.541	42.419	40.366	36.105	40.173	36.158	36.367	32.088	35.332	36.758	40.832	41.102	40.253	36.254	39.53
	39.364	38.365	42.661	38.638	39.942	41.861	39.824	40.815	42.267	40.349	32.351	39.726	33.856	37.279	37.416	36.038	37.011	41.241	40.102	39.864	33.122	39.507
	41.216	38.821	41.707	38.313	40.85	42.412	38.36	40.389	42.448	40.34	37.539	39.747	35.754	37.435	36.478	36.359	38.066	41.497	41.719	40.175	NaN	39.779
	41.077	38.361	41.82	39.291	40.036	41.804	40.06	40.241	42.465	39.953	34.424	40.471	35.269	37.695	36.257	31.267	37.287	40.937	40.497	39.022	34.461	37.096
	40.3	38.46	41.747	40.465	39.575	42.227	39.114	40.941	42.745	40.332	39.368	40.093	36.625	38.42	NaN	37.002	38.741	40.436	40.983	39.867	33.077	39.448
	40.228	39.136	41.802	38.869	41.151	41.581	40.334	40.4	42.164	40.893	38.232	39.69	34.152	38.354	35.758	35.685	36.662	40.97	40.51	38.242	NaN	39.61
	39.586	37.992	40.947	41.113	40.239	41.148	39.328	40.438	42.65	40.04	37.705	40.151	NaN	37.871	34.234	37.137	37.135	40.515	40.464	39.926	NaN	40.007
	36.931	40.263	42.195	38.194	40.465	41.603	40.692	40.46	41.817	39.231	37.609	40.356	35.985	37.987	36.662	31.086	34.793	41.207	40.521	39.144	NaN	39.591
	40.982	39.692	41.316	39.377	40.298	41.942	38.853	39.634	42.255	40.56	38.252	39.972	37.715	37.768	34.106	35.78	NaN	41.268	40.211	40.436	NaN	38.166
	40.668	38.027	42.703	39.455	40.54	42.238	39.16	40.597	NaN	41.168	NaN	40.395	36.478	37.699	35.946	35.956	38.183	40.978	40.347	38.908	NaN	40.017
	40.016	39.904	41.366	40.499	40.543	42.157	40.658	40.288	41.84	39.219	36.91	39.41	36.587	36.045	35.563	35.586	37.087	40.835	41.138	40.412	35.021	39.332
	40.209	39.534	41.285	40.117	40.153	41.158	40.085	40.839	42.004	40.004	37.451	40.006	37.143	38.42	36.95	34.649	38.486	40.72	40.185	38.554	NaN	39.87
	38.081	38.698	41.424	39.627	40.653	40.846	40.404	41.261	42.087	40.14	34.21	40.547	37.847	38.559	36.972	37.247	37.813	41.212	40.288	37.405	32.397	39.373
	40.489	38.136	41.864	40.577	40.742	41.146	40.286	39.775	NaN	40.514	34.451	40.633	37.374	37.226	37.753	36.209	37.425	40.77	40.226	41.132	NaN	38.907
	39.293	39.55	41.261	38.055	40.958	41.666	39.279	40.639	41.889	40.473	37.536	40.157	34.69	37.288	37.551	37.472	36.536	41.294	40.607	38.673	31.601	39.168
	40.287	37.849	41.251	40.261	40.171	41.367	40.297	40.466	42.43	40.694	NaN	40.019	34.138	36.949	37.289	37.908	38.501	41.397	40.746	39.789	32.041	38.555
	39.777	39.213	41.514	40.699	40.701	41.444	40.321	39.803	43.036	40.146	38.366	40.453	33.801	37.921	38.084	34.939	37.697	41.158	39.782	38.853	35.083	39.015
	39.888	39.913	41.963	40.894	40.126	41.833	39.213	41.211	42.642	39.876	36.349	40.69	37.616	36.598	36.252	36.708	37.028	40.707	40.562	40.038	34.461	39.096
	39.631	37.201	41.437	41.836	40.882	42.154	39.095	40.442	42.517	39.372	NaN	40.396	33.825	38.18	37.878	37.699	36.876	41.089	40.086	39.649	36.479	40.8
	40.693	38.011	41.94	39.749	39.651	41.256	40.341	40.78	42.233	40.438	36.53	40.04	33.815	38.389	37.839	36.999	38.639	40.078	40.765	40.41	33.301	38.82
	39.88	39.082	41.423	39.986	40.438	41.6	39.616	40.216	41.37	40.66	37.395	41.396	37.572	36.774	36.9	38.4	35.177	41.431	40.904	39.377	32.082	39.585
	41.468	38.273	41.899	40.526	41.221	41.609	39.636	38.66	42.212	39.422	37.858	39.94	35.916	36.816	36.789	36.946	36.389	40.629	39.797	38.272	NaN	39.759
	39.888	38.937	41.781	40.226	40.903	41.585	39.474	40.822	42.595	40.891	37.682	39.421	37.369	38.073	38.13	35.876	35.421	40.197	39.72	39.056	NaN	37.91
	40.155	37.543	41.79	40.107	40.866	40.863	39.373	37.711	42.8	39.107	35.86	40.01	33.135	37.531	34.27	34.913	36.502	39.827	40.739	40.41	NaN	39.491
	40.01	37.011	42.239	40.324	40.757	41.962	39.686	39.38	41.569	40.431	33.74	41.158	36.284	38.447	37.363	37.542	38.253	41.778	40.119	40.296	NaN	39.902
	40.994	38.281	42.566	39.877	40.545	41.211	40.014	39.433	42.618	39.932	36.853	41.381	37.101	37.84	37.566	36.059	37.765	39.843	39.942	40.316	31.895	40.33
	40.589	39.388	41.766	39.857	40.435	42.572	39.503	40.113	42.593	40.247	35.181	39.842	NaN	37.319	37.193	37.335	38.337	41.616	40.085	39.49	35.204	38.254
	41.427	38.526	40.22	40.519	39.906	41.115	40.347	41.333	41.734	41.141	32.602	40.187	33.83	37.593	34.201	37.795	38.123	40.794	40.643	39.801	35.23	39.923
	38.651	38.913	41.909	41.255	40.781	40.581	39.778	39.477	42.716	40.15	34.307	40.258	NaN	38.671	34.609	36.206	38.566	41.369	40.546	39.644	NaN	37.973
	35.708	38.625	41.396	40.312	39.218	41.334	39.185	39.919	42.381	39.177	31.733	39.864	37.183	37.996	35.12	36.663	38.4	40.228	41.187	39.418	NaN	40.001
	39.464	37.595	40.901	38.989	40.28	41.613	38.578	40.654	41.77	40.292	36.009	40.315	35.008	37.11	37.205	35.481	38.172	40.572	40.042	39.012	NaN	37.817
	38.838	38.987	41.684	39.602	40.968	41.487	40.311	41.195	42.558	40.656	36.019	40.251	33.792	37.77	38.105	36.204	34.293	40.975	41.083	40.531	31.88	39.939
	39.252	35.032	41.599	39.618	40.382	41.393	39.461	39.991	39.494	40.77	33.562	40.223	34.777	37.672	36.003	37.806	32.939	40.251	40.588	39.805	NaN	40.083
	39.343	39.699	41.338	39.691	41.435	41.641	39.095	40.702	41.989	40.06	36.525	40.273	33.992	38.015	38.177	37.131	33.74	41.813	40.272	40.389	NaN	38.935
	38.354	37.971	41.716	41.541	40.199	41.582	40.639	39.937	40.466	40.814	37.017	39.809	36.248	36.915	37.013	35.279	36.051	40.872	40.111	40.029	NaN	38.952
	38.14	39.678	41.343	40.839	40.501	41.445	39.364	40.504	42.722	40.472	38.966	40.054	34.572	35.829	35.574	38.067	37.807	41.46	41.326	40.31	NaN	39.297
	39.658	38.212	41.722	40.54	40.456	41.417	39.371	39.613	42.589	40.49	36.46	39.995	33.43	36.613	38.265	36.238	37.669	40.649	39.75	39.722	NaN	39.481
	40.149	38.626	41.29	40.281	39.735	41.23	38.82	40.615	41.141	40.537	36.754	41.503	34.587	36.555	35.837	37.663	38.505	41.15	40.331	40.555	33.387	38.432
	40.106	39.185	41.205	40.012	39.912	41.606	39.794	40.521	41.955	39.652	33.871	39.174	35.233	36.364	35.955	35.882	37.979	41.294	40.514	39.134	NaN	38.941
	39.763	33.752	42.147	40.424	40.215	41.812	40.026	41.255	NaN	40.135	38.48	40.271	32.594	37.259	35.066	36.502	36.821	41.218	40.761	40.901	NaN	38.388
	41.01	38.579	42.318	40.897	40.824	41.662	39.214	40.14	42.605	39.308	36.226	40.72	35.441	37.209	36.911	35.207	39.374	41.112	40.487	39.163	NaN	39.349
	40.161	39.215	41.913	39.473	40.834	42.572	39.666	40.722	42.356	39.354	34.961	40.503	36.622	37.6	37.308	37.883	38.332	40.919	40.29	40.854	NaN	39.533
	38.818	37.966	41.19	41.254	38.636	41.76	39.355	39.5	42.815	40.679	34.706	40.672	NaN	36.571	38.249	35.591	37.994	40.975	39.456	39.337	34.462	38.827
	41.093	37.018	41.333	40.258	40.994	41.332	39.03	40.854	41.588	39.166	36.573	40.303	37.117	36.959	36.637	35.323	38.38	41.171	40.693	39.317	NaN	40.83
	40.365	37.373	40.523	38.977	40.768	41.219	37.993	40.348	42.043	40.429	38.573	40.566	36.135	38.207	36.154	37.432	33.888	41.247	39.859	38.795	NaN	38.832
	38.947	38.16	41.635	41.384	40.105	41.402	40.391	39.58	42.749	39.79	36.482	40.816	35.903	37.455	36.657	34.141	37.161	39.911	40.498	39.483	NaN	40.205
	37.128	38.357	42.318	40.395	40.869	41.93	40.252	40.568	41.493	40.025	33.805	40.531	NaN	38.269	36.195	37.695	35.821	41.548	40.303	38.898	35.347	39.277
	38.212	39.987	41.86	39.675	40.854	41.725	39.41	39.07	42.492	39.923	35.319	40.616	33.54	36.952	35.785	36.704	38.251	40.304	41.419	39.424	NaN	39.961
	39.84	39.283	41.141	39.437	40.129	41.857	40.43	39.988	42.736	39.297	36.071	40.337	35.055	37.893	37.118	36.983	38.111	41.53	40.448	38.866	NaN	39.252
	40.905	39.211	41.426	39.66	39.53	40.583	39.761	39.927	42.272	38.803	37.132	40.386	36.325	37.235	35.776	36.499	38.67	40.798	40.232	40.336	33.014	40.01
	40.206	37.889	41.355	40.962	39.883	42.081	39.52	41.272	42.779	39.488	37.591	40.123	31.06	37.549	38.157	37.342	36.979	41.275	40.728	40.339	36.77	39.189
	41.656	38.468	41.911	39.837	38.91	41.678	39.891	40.755	42.438	40.57	NaN	40.091	31.22	37.349	35.715	38.06	36.493	41.539	40.534	40.702	NaN	38.927
	40.805	37.581	41.768	40.212	40.595	41.794	39.689	40.275	42.331	38.637	37.719	40.72	35.219	37.376	33.636	37.58	36.913	41.297	40.461	38.438	NaN	39.418
	37.816	37.416	42.029	40.159	39.625	41.277	40.208	39.683	42.504	39.588	37.987	40.415	37.046	37.496	35.69	38	38.882	41.285	40.515	38.682	NaN	37.798
	39.465	39.546	41.396	39.103	41.951	42.385	39.537	40.991	42.162	39.041	37.501	40.667	34.088	36.21	37.434	38.752	37.979	41.064	39.98	39.907	35.503	38.729
	40.622	38.743	41.374	39.741	40.181	41.056	39.065	40.963	NaN	40.097	36.831	40.339	31.185	37.294	37.339	37.081	37.92	41.259	40.589	38.415	NaN	37.701
	39.654	39.198	41.826	39.16	41.505	41.687	39.953	40.805	NaN	38.454	32.053	40.24	36.281	36.804	35.43	37.239	36.818	41.288	40.452	39.925	NaN	39.013
	37.831	40.433	41.334	40.402	40.996	42.304	39.75	39.622	42.654	41.392	37.08	40.029	37.108	35.881	37.094	36.654	35.128	40.229	40.61	39.721	NaN	39.087
	40.796	39.002	40.935	40.923	40.405	41.025	39.602	41.323	41.86	38.898	36.456	39.595	33.69	37.93	36.403	36.764	37.746	41.921	41.303	40.921	NaN	38.595
	40.216	38.636	41.136	38.685	40.487	41.681	40.471	39.898	42.526	40.688	32.338	40.165	36.458	36.519	35.648	37.022	34.309	41.292	39.455	38.519	NaN	40.668
	41.062	38.521	41.623	36.462	41.015	42.09	40.064	40.637	42.565	38.865	38.256	41.219	38.518	35.46	33.11	36.324	38.604	41.228	40.584	40.171	NaN	39.403
	40.838	38.237	41.108	37.81	40.398	41.321	39.971	40.465	42.106	40.106	37.646	40.104	35.458	37.875	37.912	37.566	36.824	41.102	40.577	40.061	32.79	38.088
	39.171	39.701	42.202	38.629	41.236	41.694	40.017	41.268	42.734	39.756	37.051	40.169	37.201	37.404	35.458	36.425	37.82	40.596	40.358	38.783	NaN	39.02
	40.977	39.234	41.589	40.597	39.979	40.871	40.396	40.118	41.235	41.022	34.938	40.792	37.302	37.792	36.915	38.214	37.891	41.682	40.594	39.425	34.682	40.009
	37.638	38.744	41.259	40.581	41.591	41.471	39.495	39.318	NaN	40.452	36.154	41.044	36.099	35.556	38.298	35.48	38.979	42.038	40.046	40.232	NaN	38.856
	39.549	37.994	41.464	40.247	40.196	42.047	39.209	40.469	41.74	40.69	35.397	40.586	35.799	37.313	36.67	37.948	38.101	40.397	40.906	38.718	NaN	39.862
	38.465	38.679	40.559	40.526	40.233	41.592	40.09	40.986	42.836	40.845	34.903	40.379	35.704	38.933	35.232	38.19	35.664	40.764	40.557	39.168	NaN	36.704
	37.948	39.743	41.45	39.432	40.741	41.78	39.624	40.678	41.852	39.781	36.562	40.528	35.976	36.764	34.469	35.062	36.618	41.358	40.646	41.073	NaN	39.839
	39.556	37.92	41.897	39.749	40.58	41.417	40.905	39.856	42.662	39.912	35.148	40.51	36.845	37.965	34.849	37.876	38.252	40.779	41.07	38.784	NaN	37.738
	37.573	38.244	41.617	40.32	40.867	40.858	39.718	40.71	NaN	40.472	35.581	40.331	36.707	37.743	36.536	36.975	37.468	41.237	40.496	38.088	34.777	38.502
	40.669	36.916	42.283	40.556	40.586	41.357	39.721	40.244	42.154	41.001	38.279	40.448	NaN	36.85	34.258	37.15	33.775	40.858	40.578	39.832	33.562	37.574
	39.568	38.013	41.767	39.401	40.618	41.876	40.042	38.953	42.879	40.809	38.1	39.967	36.598	38.333	31.06	35.925	38.652	41.661	40.152	39.042	32.152	38.313
	39.643	38.388	41.719	41.21	40.422	41.403	40.024	39.665	42.448	40.158	33.584	40.41	36.324	38.051	38.052	36.219	38.844	41.224	39.945	38.975	36.861	39.583
	38.343	38.477	41.986	40.553	40.468	41.372	39.268	40.994	42.38	40.528	38.013	40.27	33.006	38.091	37.098	36.789	37.971	41.087	41.324	40.253	NaN	39.667
	37.994	39.842	41.815	39.016	40.167	41.666	38.835	40.147	42.435	40.39	37.779	39.779	35.163	37.358	31.956	35.391	37.881	41.662	40.274	39.996	NaN	38.588
	39.605	39.629	41.751	40.888	39.782	41.162	40.659	39.424	41.982	40.368	36.212	39.626	36.228	36.512	37.269	34.885	38.205	41.698	40.392	40.316	NaN	39.863
	41.038	38.984	40.84	39.764	40.485	41.367	40.405	40.414	42.299	40.353	NaN	40.279	37.429	36.768	33.547	35.114	38.196	40.728	41.243	39.405	36.838	36.618
	38.613	38.341	41.342	39.189	40.339	41.767	39.339	40.477	42.179	39.853	35.681	41.105	NaN	37.513	37.154	36.405	38.43	41.627	40.005	40.176	35.506	39.766
	41.196	39.196	41.595	39.06	40.559	41.627	39.465	40.469	42.325	39.663	37.062	41.158	37.451	37.461	37.448	36.242	38.651	41.811	40.314	40.646	NaN	38.66
	39.061	37.94	41.517	40.271	40.33	42.329	39.974	40.749	42.376	40.313	NaN	40.546	37.118	37.968	37.95	37.011	38.48	41.319	41.179	40.863	33.002	39.186
	40.58	38.95	41.834	40.675	39.669	41.508	40.025	40.026	42.691	40.1	38.077	41	34.215	38.749	37.041	37.728	37.379	41.758	40.041	39.97	33.314	39.404
	39.861	39.694	41.572	40.102	39.847	42.074	39.417	41.34	42.883	40.323	33.361	40.458	35.749	38.038	35.395	36.609	38.463	41.096	39.486	38.898	NaN	38.541
	39.37	36.986	41.292	40.942	39.842	41.012	38.06	39.202	42.245	39.78	35.741	41.028	33.914	38.259	36.547	33.254	38.383	41.005	40.658	40.932	34.02	39.747
	39.179	38.469	42.197	39.899	40.746	41.404	40.254	40.631	42.672	39.96	37.248	39.814	37.175	36.779	37.514	35.835	35.522	40.915	39.87	39.759	36.313	37.721
	39.968	38.247	41.99	40.914	41.208	41.107	40.052	39.055	41.973	39.115	38.546	40.608	35.945	38.38	34.73	36.741	38.309	41.24	40.579	40.123	34.515	38.385
	40.846	39.419	41.15	40.032	40.996	42.243	39.247	40.05	41.615	40.974	37.795	40.474	33.978	38.052	37.496	NaN	38.142	40.766	41.315	35.178	NaN	35.343
	39.013	39.87	41.938	39.484	41.215	41.667	39.987	40.112	42.135	40.438	37.286	40.313	35.676	36.883	34.863	35.114	38.844	40.546	40.543	37.585	NaN	38.279
	40.526	39.583	41.888	39.478	41.127	41.875	40.248	41.377	42.959	39.846	35.799	40.258	34.428	37.625	36.111	35.088	36.535	41.602	39.936	39.771	34.253	38.283
	39.765	40.071	41.121	38.869	41.104	41.345	40.059	40.104	42.544	40.332	35.917	40.422	37.145	38.366	33.612	35.873	37.853	41.305	40.521	38.697	NaN	40.063
	38.548	38.185	42.115	39.915	41.18	41.94	40.481	40.76	41.871	40.701	35.265	40.6	36.778	37.794	35.31	35.899	35.816	40.54	40.842	38.758	34.982	39.511
	38.959	38.566	42.091	41.181	40.628	41.775	39.742	40.658	42.376	39.491	36.137	39.929	36.581	37.958	36.265	36.978	37.525	41.388	40.492	39.393	31.324	37.376
	40.86	39.097	40.644	40.486	41.049	41.372	39.573	40.45	42.698	38.838	37.694	40.006	33.908	37.359	NaN	38.807	38.369	40.644	39.493	39.888	NaN	38.885
	39.58	38.185	41.971	39.02	40.258	41.502	40.223	40.514	41.201	40.373	37.957	39.681	35.396	38.259	33.488	37.236	36.278	41.484	41.159	40.797	34.518	39.107
	40.967	39.852	41.379	39.433	39.841	41.356	39.744	41.181	42.816	39.73	35.482	40.005	36.645	37.924	35.663	38.527	36.272	41.279	40.077	40.047	36.794	39.458
	39.446	37.135	41.633	39.239	40.396	41.438	39.857	39.302	41.785	40.917	36.513	40.407	36.668	38.351	32.957	38.692	NaN	41.858	40.417	40.712	NaN	40.1
	40.948	37.703	41.992	40.318	39.754	41.301	38.526	39.765	42.761	39.287	37.424	39.927	34.892	37.862	38.695	37.056	36.642	41.223	39.543	40.156	NaN	39.324
	39.182	38.581	41.099	40.356	39.869	40.836	39.178	40.048	42.346	40.807	33.753	40.428	34.123	37.561	37.23	38.057	37.09	39.566	40.859	38.628	NaN	40.095
	37.745	39.498	41.087	40.38	41.02	41.337	40.741	40.445	41.816	39.967	37.306	40.731	37.392	37.671	37.892	38.056	36.394	41.013	40.806	38.564	NaN	37.794
	40.088	37.952	41.532	39.105	40.439	41.91	40.037	39.812	42.402	39.804	37.679	41.202	36.936	37.62	38.34	37.532	35.079	41.301	40.989	38.467	35.289	38.448
	41.022	39.362	41.786	41.05	40.818	41.417	40.41	40.863	41.554	39.887	36.13	41.288	36.107	36.125	37.467	38.082	37.42	39.978	40.941	40.447	33.774	40.152
	38.333	39.649	41.552	40.312	40.596	41.375	39.963	39.78	42.662	39.559	34.062	40.26	32.399	37.219	34.841	37.243	36.721	40.841	41.342	39.251	36.426	39.339
	39.973	38.051	41.704	40.617	40.376	42.654	40.534	39.623	42.668	40.861	37.724	40.063	35.713	38.266	36.675	35.698	35.345	41.428	40.71	39.904	NaN	37.3
	37.851	37.691	41.513	40.842	40.011	42.011	40.976	40.796	42.141	40.742	36.601	39.564	35.936	38.155	35.485	36.709	36.106	41.218	40.476	37.575	34.204	38.237
	40.553	40.048	41.154	39.655	40.517	41.401	39.49	40.525	42.606	39.348	35.677	40.241	34.914	37.246	36.77	35.837	38.423	40.409	39.436	38.747	33.256	39.715
	38.377	36.901	41.992	40.639	41.584	41.485	40.937	39.921	42.468	40.092	36.737	40.563	35.668	37.916	36.613	34.54	36.625	39.711	39.744	38.928	NaN	39.738
	39.198	39.52	41.075	40.509	41.612	41.736	39.749	39.864	42.62	41.113	35.012	40.354	NaN	37.359	37.096	37.149	39.143	41.191	41.094	39.291	34.375	39.455
	39.339	37.982	41.81	39.967	40.162	42.238	39.584	40.722	42.076	40.281	37.94	40.734	36.635	36.91	32.511	37.577	33.261	39.69	40.067	40.297	NaN	38.727
	39.293	39.377	42.003	40.546	40.058	41.691	40.342	40.75	NaN	40.414	37.086	40.727	32.659	37.71	36.755	36.464	37.353	40.063	40.309	40.59	35.985	39.228
	38.218	39.653	42.303	40.857	40.972	42.173	39.799	40.346	41.024	40.152	36.411	40.707	34.868	36.394	34.171	35.168	37.818	40.927	40.83	39.526	36.152	40.385
	39.839	37.97	42.134	40.8	40.909	42.033	39.284	40.347	42.509	40.179	37.665	41.224	34.979	36.471	37.651	36.816	38.615	40.449	40.823	39.479	33.585	39.206
	40.064	37.168	41.222	38.151	40.072	41.654	40.07	40.581	42.115	40.524	33.793	40.133	35.124	37.977	36.722	37.136	37.83	41.771	40.577	39.564	NaN	38.857
	40.206	38.962	42.502	41.179	39.868	41.147	40.693	40.825	42.506	40.687	36.097	40.214	34.909	36.991	34.699	39.132	38.144	41.094	40.414	40.605	NaN	36.807
	40.749	38.654	41.049	40.255	40.574	41.701	39.105	40.774	42.368	38.683	36.944	40.14	35.692	38.571	35.921	NaN	35.818	41.318	40.447	41.307	34.596	38.653
	40.237	36.19	40.744	40.816	40.335	41.552	38.365	40.63	43.034	40.415	36.205	41.226	37.268	38.414	35.108	37.2	38.322	41.407	39.978	39.938	34.006	38.778
	40.514	38.733	41.691	41.273	40.436	41.055	40.379	39.135	42.63	39.544	35.924	41.492	37.946	37.608	36.568	36.331	38.522	41.082	40.116	38.875	NaN	39.717
	38.421	38.515	40.678	40.696	41.111	41.306	40.482	39.086	42.743	40.233	35.907	39.996	35.984	37.458	36.696	36.236	35.335	41.058	40.277	40.09	NaN	39.397
	39.883	38.743	41.832	41.416	39.071	41.754	39.465	41.238	41.723	40.454	33.586	39.942	35.059	36.337	36.398	35.542	37.486	41.313	41.074	40.319	37.423	39.721
	36.885	37.751	41.643	38.393	40.634	41.622	40.536	41.399	42.739	40.533	36.278	39.78	36.385	37.137	37.882	35.928	36.826	41.109	39.978	40.419	NaN	40.542
	39.211	38.56	42.171	40.608	41.019	41.347	40.526	39.979	42.548	40.819	34.815	41.375	34.901	38.521	36.139	33.611	36.938	41.338	40.582	40.326	NaN	39.712
	41.237	36.95	41.673	39.997	40.589	41.338	39.458	41.395	41.77	40.083	37.812	40.703	38.117	36.746	37.23	37.935	38.535	41.302	40.674	38.49	NaN	39.814
	41.083	39.463	41.204	39.366	40.652	42.082	39.325	39.922	42.984	39.721	NaN	39.766	37.785	37.197	34.53	34.551	36.86	41.162	40.542	40.177	31.956	38.578
	39.387	40.152	41.923	40.48	39.822	41.345	38.48	39.476	41.796	40.567	37.339	39.519	31.085	37.149	37.875	37.169	35.953	41.108	40.533	39.44	NaN	38.925
	40.572	39.343	41.57	39.468	40.98	41.454	39.415	40.394	42.824	41.104	36.715	40.359	35.409	38.228	34.549	34.806	35.032	41.055	40.707	40.028	NaN	38.443
	39.456	39.465	42.295	40.195	39.725	41.699	39.696	41.303	42.843	40.881	37.941	40.852	32.535	38.483	35.141	36.095	35.501	41.646	39.86	40.036	NaN	39.838
	38.769	38.638	40.819	40.883	40.107	41.223	39.847	40.909	42.338	39.171	35.423	40.831	35.201	37.945	37.263	32.838	36.282	41.853	40.517	40.069	NaN	39.553
	39.058	39.016	42.167	40.758	40.266	42.209	40.041	40.456	42.263	39.691	37.753	40.569	37.945	37.627	33.793	37.233	35.963	41.165	40.213	38.644	37.65	39.349
	40.389	39.811	40.92	39.224	40.563	41.038	40.086	40.364	42.723	40.465	35.736	39.661	38.026	37.933	37.339	35.821	39.175	41.181	39.332	39.426	33.088	39.744
	39.84	39.058	41.121	40.751	40.871	42.344	39.228	41.047	42.619	39.631	36.694	40.475	36.119	38.154	35.547	33.067	39.214	40.582	41.408	41.143	37.434	40.632
	40.789	38.078	41.346	40.034	40.374	41.298	40.279	41.141	42.009	39.649	37.053	39.207	35.554	38.256	36.52	37.321	37.927	41.619	40.855	40.466	NaN	40.188
	41.116	38.143	42.165	39.34	41.339	41.648	40.521	39.452	42.504	40.922	38.255	41.556	34.526	37.998	37.136	35.073	37.503	40.092	40.016	38.291	NaN	40.886
	40.083	37.088	42.44	40.384	40.767	41.284	38.901	40.573	42.729	39.21	37.462	39.844	38.041	35.684	37.452	38.67	36.454	40.967	40.082	37.121	35.411	36.811
	39.131	39.962	42.274	41.215	40.82	41.732	40.561	40.888	42.385	40.997	32.1	40.106	34.597	36.431	35.408	33.7	37.902	41.286	40.361	40.819	34.812	38.48
	40.703	37.666	41.021	40.817	41.316	41.205	40.484	40.708	41.762	40.534	32.883	40.77	34.186	36.479	35.524	37.506	38.611	41.169	39.69	40.51	32.99	39.791
	40.594	38.748	41.516	39.822	40.053	41.772	40.354	41.38	41.347	40.052	36.941	40.317	38.323	37.449	37.469	33.546	36.626	40.741	40.845	40.627	35.562	38.25
	41.11	38.675	41.96	39.151	40.647	40.77	40.178	39.845	42.732	40.329	NaN	40.857	36.253	37.694	37.34	35.981	36.716	40.607	39.105	40.153	34.176	38.871
	40.436	40.134	40.812	41.463	40.978	41.906	40.071	39.367	42.432	40.064	35.944	40.404	36.003	37.422	36.772	35.575	38.35	40.906	40.565	39.064	NaN	38.181
	37.315	36.897	41.092	39.04	40.59	40.821	40.774	40.155	42.201	40.573	34.782	40.392	NaN	37.892	35.891	NaN	37.856	41.119	39.957	40.274	NaN	39.448
	39.536	39.572	41.723	39.023	40.124	41.831	39.551	40.484	42.18	40.342	34.466	40.349	34.351	37.77	37.659	35.595	36.423	41.077	40.828	39.003	36.7	39.564
	41.202	37.927	41.923	42.028	40.867	41.693	39.237	40.894	42.917	39.376	37.899	40.069	37.691	37.079	36.192	37.514	37.481	41.511	40.99	39.78	NaN	38.691
	39.273	38.647	40.264	40.09	41.171	41.012	39.673	39.673	42.153	40.151	36.932	39.77	36.284	36.363	36.123	37.018	36.057	40.947	40.642	39.743	33.948	39.069
	41.349	39.228	41.023	41.064	40.322	41.489	39.572	39.88	42.049	40.533	38.906	40.51	36.665	37.962	34.57	37.013	35.148	42.485	40.687	40.324	33.802	40.569
	40.907	36.805	42.119	40.835	40.068	41.83	40.308	39.549	42.811	39.409	34.927	40.661	36.572	38.141	37.625	36.703	37.441	41.23	40.296	39.96	33.778	39.314
	40.06	38.065	40.969	38.429	39.684	41.139	39.315	40.162	42.742	40.183	38.022	40.904	31.457	37.868	37.879	36.754	31.011	40.415	40.127	38.695	NaN	39.728
	40.27	39.485	41.118	40.357	41.055	41.494	39.535	40.995	42.593	39.813	36.18	40.169	37.72	38.195	35.219	36.37	38.249	41.649	40.79	40.177	NaN	39.679
	41.422	37.445	41.598	37.703	40.715	41.372	40.223	39.067	42.025	40.559	37.676	39.734	33.633	37.64	35.148	36.27	37.621	40.489	40.468	37.901	NaN	39.976
	40.622	39.39	41.674	41.394	39.981	41.771	39.675	40.86	42.01	40.19	36.131	40.131	36.903	37.002	38.433	37.66	36.683	41.828	41.003	39.411	32.754	39.725
	37.935	38.559	42.225	40.274	39.817	41.83	39.864	39.329	42.061	40.638	36.942	40.31	35.433	37.944	35.914	36.966	36.69	41.335	38.565	40.075	35.638	38.937
	40.681	39.277	41.905	39.209	39.918	41.43	40.554	40.933	43.06	39.569	37.229	40.402	35.269	37.744	36.398	36.646	35.605	41.286	40.774	40.361	32.67	39.607
	40.555	39.081	41.128	40.659	40.261	40.928	39.524	38.936	41.751	40.424	35.168	40.638	36.338	38.274	37.24	37.667	39.096	41.422	40.089	40.005	32.64	39.179
	40.365	36.561	42.153	40.535	40.588	41.497	40.556	40.597	42.949	40.358	34.171	39.874	36.536	38.527	35.225	35.417	39.245	41.536	40.814	38.083	NaN	37.66
	37.748	39.12	41.169	37.954	39.975	42.125	39.283	39.018	42.702	39.487	36.487	40.307	37.505	36.197	38.59	38.746	37.669	40.286	41.159	39.88	36.014	38.675
	39.933	37.478	42.374	39.797	39.633	41.629	40.034	39.432	42.671	40.436	37.916	40.128	36.677	37.467	37.73	38.164	36.513	41.056	40.734	40.277	NaN	38.326
	40.673	39.6	41.752	40.341	40.985	41.65	40.351	40.586	42.319	39.969	37.087	39.923	33.634	37.047	37.326	36.245	36.911	40.642	40.154	40.219	NaN	39.574
	39.576	37.968	42.428	39.709	39.769	41.404	40.673	41.455	42.65	39.739	36.062	40.686	37.936	38.538	NaN	37.045	37.483	41.287	40.186	40.384	NaN	38.738
	40.727	37.022	41.312	40.234	40.647	41.759	40.276	40.333	42.614	40.257	37.409	40.284	NaN	38.441	38.432	36.187	36.251	41.415	40.393	36.322	NaN	37.374
	39.927	39.561	42.181	39.734	40.506	40.939	39.943	41.028	NaN	39.909	36.728	40.429	36.903	36.742	37.647	36.608	37.828	40.747	40.956	38.924	NaN	39.324
	38.993	38.29	42.355	38.999	40.324	42.155	39.872	39.221	42.094	39.912	34.234	40.893	34.999	36.771	38.091	36.933	37.459	41.262	41.203	40.279	NaN	38.792
	40.55	38.178	41.934	40.584	40.861	41.779	39.076	40.46	42.293	40.705	37.436	40.855	36.568	36.203	35.266	37.454	39.056	41.062	40.545	39.317	NaN	39.122
	41.38	38.642	42.032	40.264	40.658	42.467	39.368	40.195	42.336	40.284	32.358	40.003	33.282	36.859	38.913	36.063	35.764	41.142	40.002	39.88	36.161	39.27
	40.967	39.66	41.497	39.719	40.65	42.335	39.677	40.35	42.891	40.932	36.988	40.476	37.927	38.186	38.147	37.599	37.252	40.412	40.241	38.425	34.157	40.166
	39.692	39.128	41.159	40.658	41.516	41.841	39.636	40.807	NaN	40.491	37.39	40.863	37.434	35.926	36.534	37.023	36.565	41.117	39.797	40.312	35.502	40.201
	37.987	38.12	42.251	39.631	40.555	42.315	39.598	40.032	42.48	40.748	NaN	41.064	38.812	37.58	38.153	37.458	35.734	41.628	40.713	39.598	36.462	37.736
	37.628	39.917	42.543	39.654	39.98	42.364	39.856	40.883	42.423	40.016	38.094	41.166	37.322	36.973	37.096	37.639	38.922	41.12	39.934	38.163	NaN	39.648
	38.97	40.256	42.14	38.85	41.066	42.406	39.984	40.658	42.581	40.768	36.837	40.37	37.749	36.391	36.537	35.985	34.696	41.304	40.903	40.071	NaN	39.467
	36.83	39.257	41.609	39.799	40.88	42.1	39.796	40.22	42.296	40.292	35.935	40.284	33.887	37.226	35.534	35.782	39.017	41.317	40.935	39.16	NaN	40.181
	40.715	39.791	42.109	40.579	40.397	41.314	39.535	39.204	42.37	40.129	37.121	40.266	35.46	38.087	37.107	35.114	38.746	41.569	40.384	37.307	33.138	38.713
	40.861	38.388	42.13	39.521	40.088	41.346	39.833	40.122	42.959	39.812	32.356	40.259	34.61	36.772	36.881	37.29	36.421	41.347	41.669	39.262	NaN	39.658
	40.885	38.347	41.554	40.478	40.7	41.505	39.353	41.755	42.251	39.508	37.093	40.071	36.093	37.144	35.453	34.433	37.331	40.607	40.428	41.105	NaN	39.33
	39.599	38.204	41.908	40.868	40.068	41.569	39.739	40.459	41.854	40.525	36.617	40.452	36.007	38.055	37.769	35.913	36.661	41.555	40.469	37.579	NaN	39.722
	39.13	37.84	41.576	38.35	40.567	42.196	40.904	39.707	42.322	40.372	37.795	40.857	33.555	38.127	35.905	34.535	38.671	40.977	40.247	39.598	NaN	39.82
	41.198	38.278	41.771	39.747	41.361	41.8	39.245	40.855	42.408	40.301	38.225	40.445	NaN	37.703	33.481	38.097	36.508	41.38	39.033	40.634	NaN	40.045
	41.306	39.613	41.377	40.672	40.842	40.83	39.783	40.85	42.416	40.612	37.455	39.928	34.72	38.195	34.501	34.999	38.403	41.215	40.765	39.535	35.53	38.934
	39.095	38.949	41.603	39.732	40.643	41.449	39.915	40.254	42.349	40.41	34.802	40.731	33.2	37.093	37.996	37.826	36.009	41.627	40.361	40.273	NaN	38.627
	39.726	37.953	41.584	39.311	39.762	41.33	39.69	39.963	42.673	40.333	36.839	39.42	36.777	38.14	38.299	34.082	38.023	41.883	40.788	40.908	NaN	38.97
	39.785	38.461	41.406	39.176	41.128	41.827	39.995	41.308	42.013	39.659	35.843	40.371	36.499	37.873	36.178	38.372	37.918	41.379	41.273	40.499	NaN	39.876
	39.919	38.95	41.039	40.144	41.086	40.887	39.456	40.625	42.697	41.034	37.978	40.259	37.891	37.166	37.259	34.503	37.109	40.027	40.124	39.889	NaN	38.431
	41.27	36.079	40.194	40.12	40.964	41.026	40.054	40.726	42.5	40.916	35.008	41.007	36.889	37.032	37.1	36.636	38.623	40.321	40.478	39.249	NaN	39.176
	39.217	38.602	40.911	39.93	41.076	41.614	39.674	40.452	41.928	40.673	32.085	40.2	37.368	37.114	36.733	37.927	38.562	40.63	40.485	40.069	NaN	38.43
	41.143	37.481	41.55	39.842	41.136	42.815	40.031	40.207	42.474	39.461	37.861	39.689	37.156	37.437	35.089	36.801	37.153	41.008	40.4	39.699	36.446	39.627
	40.126	38.77	41.412	39.477	40.61	41.861	39.377	40.872	NaN	39.988	37.166	40.185	33.734	37.807	33.756	38.073	37.369	41.31	40.885	41.2	37.922	37.84
	39.208	38.555	40.681	39.882	40.025	41.241	40.271	38.406	40.922	39.319	38.214	40.441	37.556	38.333	37.025	36.459	34.561	40.777	41.18	39.528	33.814	39.043
	38.606	39.926	41.501	40.436	40.65	41.932	39.135	40.44	42.562	40.608	37.007	39.981	36.115	37.789	35.847	37.305	38.282	41.743	40.945	38.631	32.983	36.442
	39.853	34.576	41.146	40.023	40.574	42.052	40.582	40.767	41.852	41.396	37.156	40.845	36.83	38.289	37.98	37.479	38.967	40.719	40.256	40.208	33.781	39.172
	40.588	38.774	41.736	40.057	40.675	41.722	38.462	40.29	42.187	40.165	37.794	40.418	36.165	37.022	35.273	38.284	37.515	41.066	40.645	40.017	34.069	39.493
	39.075	38.367	42.015	40.41	40.326	40.237	40.457	40.653	42.489	40.01	37.144	40.639	37.267	37.712	37.668	35.744	39.022	40.734	40.751	39.691	NaN	38.408
	37.132	39.237	41.918	38.836	39.887	41.428	39.636	39.27	40.989	39.772	37.887	40.615	37.232	36.966	38.468	37.949	38.674	41.292	40.669	39.733	NaN	39.149
	39.861	38.25	42.495	41.094	39.968	41.18	39.562	40.326	42.335	40.833	34.492	39.957	35.709	38.173	33.68	38	38.101	41.04	41.415	38.198	33.509	38.037
	39.444	39.163	42.002	39.777	41.187	41.547	39.824	40.33	42.091	40.795	38.528	40.437	35.649	37.428	38.289	38.07	37.874	40.251	40.854	39.614	NaN	39.441
	39.603	38.767	41.323	37.984	40.558	42.36	40.508	40.523	42.826	40.499	39.121	40.572	37.021	36.915	37.043	36.823	36.117	39.852	40.188	39.789	NaN	38.831
	39.202	38.17	41.766	37.964	40.35	41.586	40.434	40.439	42.334	39.157	32.06	39.749	36.412	37.104	33.277	36.979	37.876	41.624	40.846	40.98	NaN	39.864
	40.753	39.914	42.108	40.871	39.493	40.807	39.237	40.462	42.04	41.002	33.94	41.114	37.389	38.319	36.542	37.001	37.004	40.651	40.88	39.653	NaN	39.691
	39.902	37.692	42.1	41.135	39.808	41.457	40.277	39.39	41.947	40.113	37.31	40.354	36.515	37.256	38.074	35.002	37.288	40.56	40.864	36.546	34.649	38.384
	39.802	37.16	41.743	40.227	39.926	40.993	40.452	41.057	42.782	40.175	39.495	40.206	34.049	35.918	34.425	38.617	37.59	41.286	40.242	39.926	NaN	39.745
	40.965	39.114	41.729	39.964	40.819	41.952	39.372	40.228	42.852	39.883	NaN	40.563	32.164	37.548	37.291	38.473	38.702	41.469	40.896	40.429	33.995	39.379
	40.658	39.16	42.35	39.882	41.578	41.544	39.896	40.046	42.479	41.244	37.465	40.555	36.854	38.065	36.287	35.798	37.894	40.503	40.463	40.322	37.593	39.667
	40.832	38.008	43.043	38.579	40.689	41.027	40.294	39.652	41.573	39.327	33.174	40.429	36.533	37.143	35.718	37.215	35.923	39.996	40.246	38.96	35.98	39.437
	39.301	38.851	41.159	40.515	40.909	41.599	39.225	40.405	42.447	40.542	37.638	40.61	NaN	37.423	35.343	33.873	35.944	39.298	40.848	40.487	NaN	39.171
	36.808	37.212	40.748	40.005	40.474	40.901	39.237	41.214	41.148	40.717	NaN	40.453	35.079	37.664	36.683	37.921	36.976	41.132	40.868	40.12	34.742	40.618
	40.298	39.022	41.593	39.665	41.012	41.524	39.908	41.067	42.631	40.944	37.413	40.045	32.408	38.221	34.61	35.563	38.661	40.476	40.481	38.441	NaN	39.574
	40.766	36.756	42.092	38.754	40.03	41.886	40.019	40.758	NaN	40.742	37.228	41.193	33.817	37.682	37.393	36.221	37.879	42.049	40.497	40.113	36.081	40.291
	37.748	39.515	41.977	38.719	41.03	40.784	40.515	40.335	42.608	40.469	36.624	40.428	31.244	34.69	37.577	36.183	35.288	41.462	40.805	40.146	NaN	39.589
	40.642	37.94	42.102	41.257	40.856	40.805	39.345	38.303	42.438	40.697	36.989	40.238	35.227	37.102	37.638	36.719	35.377	41.344	40.08	39.596	NaN	39.113
	40.885	39.851	40.587	37.998	39.558	41.534	39.492	40.51	42.619	39.409	34.733	40.573	33.181	37.828	38.77	36.318	36.183	41.397	40.486	40.727	35.432	40.258
	40.135	38.58	41.832	40.848	40.938	41.968	39.682	38.964	42.109	40.511	33.936	39.469	35.426	38.3	34.283	35.886	36.016	41.246	40.964	39.697	NaN	39.966
	40.362	39.222	41.425	41.237	40.742	41.917	40.262	40.546	41.549	39.453	35.003	40.468	37.248	36.555	35.122	36.553	36.653	41.816	40.291	40.222	NaN	39.085
	40.361	39.844	42.184	41.289	40.716	42.297	40.097	40.91	42.728	40.93	37.657	39.665	37.594	35.912	37.283	37.064	38.175	41.846	40.591	39.226	NaN	39.539
	40.401	38.584	41.721	37.554	40.743	40.971	40.325	40.404	41.965	41.016	37.223	40.785	36.361	37.668	36.067	37.182	35.459	39.72	40.69	40.532	NaN	38.02
	40.268	38.645	41.269	39.79	40.779	42.092	40.36	40.028	42.982	41.212	37.416	40.778	34.732	37.736	35.882	37.72	36.771	41.297	40.133	40.111	32.591	38.008
	41.7	37.807	41.589	40.953	40.722	41.694	40.483	41.24	41.973	40.785	36.96	40.12	35.88	38.878	37.976	37.976	36.207	40.296	39.699	40.364	35.611	37.753
	39.809	39.081	42.044	38.763	40.329	41.81	39.335	38.999	42.922	39.084	36.509	40.336	31.249	36.886	36.43	35.063	37.226	40.768	40.371	40.081	NaN	39.12
	41.048	37.486	41.236	41.283	40.775	41.141	39.764	41.143	42.931	40.861	34.578	40.202	37.424	37.292	37.13	37.043	37.933	41.008	40.511	36.997	NaN	39.491
	40.455	38.939	40.349	39.748	41.118	42.769	39.283	41.35	42.055	40.517	35.664	40.417	33.922	36.227	35.162	37.334	37.749	41.544	40.585	39.785	NaN	39.012
	39.663	39.406	41.145	38.884	40.149	41.806	39.358	40.59	42.57	40.798	36.661	40.505	37.102	37.563	37.831	37.488	38.874	40.706	40.705	40.546	35.376	37.76
	39.545	38.741	42.378	39.25	41.06	41.148	38.59	41.192	42.99	40.511	36.492	40.087	37.565	37.481	37.626	35.195	37.146	40.899	40.322	39.748	NaN	39.908
	39.233	38.767	41.554	38.536	40.366	40.809	39.821	40.19	NaN	41.11	36.184	40.413	37.297	36.964	36.373	37.523	37.978	40.481	40.145	39.282	NaN	38.515
	38.051	37.77	41.755	40.86	39.966	41.659	40.011	41.061	42.625	40.98	36.43	39.847	NaN	38.194	35.308	37.909	37.861	41.126	40.453	40.439	NaN	40.134
	39.248	38.446	42.651	41.528	40.914	41.82	40.068	38.583	42.649	40.689	35.592	39.629	34.12	38.531	38.092	37.64	37.104	41.275	39.912	39.342	NaN	39.723
	38.217	39.618	41.651	40.648	40.148	42.082	40.024	40.789	42.348	40.068	36.903	40.476	37.459	37.914	36.039	36.52	38.715	40.523	40.931	38.652	NaN	39.079
	35.853	39.084	41.884	36.379	39.754	41.516	39.645	40.184	42.813	40.81	37.116	39.721	37.767	38.19	33.168	33.032	36.116	40.221	40.995	39.415	NaN	39.586
	40.536	38.935	41.04	38.483	40.529	40.846	40.738	40.87	42.733	40.07	37.552	40.37	36.524	37.369	37.766	34.184	37.377	40.877	39.548	40.725	NaN	40.164
	39.985	38.317	42.363	39.184	40.515	41.395	38.82	40.192	42.155	39.376	36.184	40.519	37.869	37.494	37.732	36.779	37.98	41.473	40.861	41.475	33.939	37.892
	39.276	39.671	42.068	39.131	41.164	41.35	39.893	41.601	43.093	40.472	37.893	39.667	NaN	37.622	37.437	37.235	36.588	40.458	40.031	40.506	35.512	40.62
	39.604	37.923	41.744	41.247	41.158	41.303	40.137	40.501	41.678	40.756	NaN	40.049	37.236	37.98	34.715	35.439	32.096	41.254	40.597	40.124	NaN	39.9
	39.906	39.252	41.486	40.343	40.94	41.789	40.08	40.479	42.488	41.017	37.592	41.051	35.835	37.052	36.795	37.792	38.046	42.068	40.392	40.326	NaN	39.304
	40.086	38.279	41.565	41.52	40.583	41.641	40.491	40.526	43.015	40.801	37.149	40.554	32.344	38.12	37.183	37.513	35.814	41.783	40.777	37.547	32.916	39.701
	39.044	39.678	41.126	41.141	41.523	41.016	38.967	41.318	42.409	40.27	37.795	39.776	33.114	38.328	35.237	36.549	38.377	41.3	39.673	39.285	31.487	39.535
	39.222	37.939	41.583	40.413	40.468	41.44	40.393	39.851	42.428	40.399	38.425	39.46	37.457	37.45	37.007	32.175	37.911	40.358	40.646	39.198	NaN	38.045
	39.38	39.108	41.601	39.352	39.494	41.757	40.376	39.857	42.37	41.076	37.071	41.207	NaN	37.334	37.322	35.096	38.311	40.921	40.594	37.988	NaN	39.366
	40.979	39.149	40.37	40.494	40.126	42.14	39.428	41.121	42.382	40.522	36.576	40.72	37.976	36.99	30.19	34.802	36.708	41.498	40.99	38.701	37.956	39.398
	40.436	38.327	40.33	40.503	40.887	42.552	40.518	40.772	42.846	39.35	36.938	40.25	37.634	37.04	37.37	34.748	34.898	41.182	40.651	39.948	35.382	39.436
	39.049	38.991	41.76	40.376	39.821	41.481	40.222	41.034	42.908	39.888	36.968	39.434	36.363	37.411	36.197	36.395	34.436	41.921	40.575	40.68	NaN	38.902
	40.065	39.06	42.012	39.951	40.766	41.467	40.486	39.797	42.593	40.204	NaN	41.058	NaN	37.338	37.437	35.881	35.523	41.498	40.162	39.908	NaN	39.117
	37.268	39.496	41.588	39.553	40.715	42.241	39.398	41.033	42.368	40.777	31.726	41.322	37.164	38.429	36.168	34.236	36.64	40.706	41.536	39.888	NaN	39.341
	39.245	38.089	42.174	40.72	40.152	40.921	40.075	40.019	41.901	40.191	37.416	40.28	37.775	38.311	38.65	35.404	36.571	41.111	40.075	40.242	36.95	38.805
	40.837	39.6	41.082	40.19	40.155	42.075	40.054	40.331	41.704	41.187	36.69	40.566	35.995	37.603	37.008	36.736	35.41	41.072	41.299	39.101	33.856	39.854
	40.547	39.277	41.823	39	40.176	41.547	38.347	40.496	42.691	40.227	36.62	40.52	NaN	37.831	37.868	34.835	38.199	41.642	40.299	37.246	NaN	39.958
	40.762	37.918	41.296	40.934	40.039	41.448	40.646	40.193	41.75	41.008	39.052	39.834	34.144	37.513	35.024	36.215	34.947	41.457	40.715	38.509	NaN	37.586
	39.819	38.056	41.409	41.138	39.525	41.299	39.948	40.305	42.338	40.182	36.155	39.585	36.352	37.522	37.588	36.623	39.29	40.326	40.197	38.814	33.63	38.918
	38.142	36.58	42.332	40.347	39.778	42.037	40.008	40.13	42.501	39.262	33.746	39.412	36.964	38.344	37.942	36.21	35.913	40.746	39.669	40.287	NaN	38.94
	37.272	39.495	41.309	40.51	41.22	42.427	40.128	40.228	41.978	40.23	33.57	40.933	37.598	37.953	NaN	37.097	37.299	41.571	41.386	40.653	NaN	38.115
	41.884	38.619	41.642	39.847	39.831	41.55	40.673	40.555	41.451	40.33	34.508	40.091	33.911	37.577	38.102	34.146	36.644	41.516	40.807	37.812	NaN	38.313
	41.424	36.212	42.147	39.208	39.907	42.031	40.099	40.17	39.809	41.015	36.132	40.517	31.185	36.495	36.455	35.989	34.861	41.939	40.113	39.901	37.285	39.918
	39.491	39.696	41.362	40.14	40.574	41.716	40.104	40.945	41.743	39.405	37.509	40.587	37.241	37.158	37.45	37.788	36.699	39.953	40.826	39.88	34.311	36.623
	41.232	39.287	41.676	39.958	40.8	40.86	39.9	39.949	41.972	39.61	38.807	41.276	36.031	37.303	36.383	36.696	34.395	41.502	40.897	39.041	33.067	39.735
	38.959	39.724	41.664	40.234	40.455	41.502	38.849	39.654	41.726	40.266	35.279	40.475	36.554	37.364	37.533	37.503	38.055	40.997	40.102	39.025	33.299	37.829
	35.538	38.995	41.791	40.418	41.247	41.226	38.946	39.447	42.06	40.33	35.711	40.746	36.351	37.535	36.969	38.138	35.235	41.108	40.139	40.297	NaN	39.429
	40.329	39.725	41.907	39.69	40.786	41.853	40.053	41.064	41.456	40.084	34.643	40.889	34.204	37.311	34.116	34.682	34.559	40.671	40.913	40.211	34.272	40.252
	36.925	39.34	40.524	40.657	40.12	41.201	40.367	40.638	NaN	40.994	36.837	39.566	34.354	38.275	35.865	37.322	36.403	40.876	40.254	39.413	32.846	40.289
	38.741	39.948	41.845	40.713	40.391	41.55	40.353	40.546	42.452	41.116	36.273	40.588	36.535	38.768	34.508	37.165	37.315	40.981	40.343	39.83	35.708	38.775
	40.097	37.971	41.386	39.465	40.231	41.91	39.852	40.971	42.026	39.262	37.34	40.888	35.431	37.205	36.336	32.379	38.392	41.757	40.321	41.453	NaN	39.64
	38.147	38.973	41.865	40.349	40.472	41.349	39.431	40.705	42.546	40.984	36.341	39.184	NaN	36.604	37.226	36.66	33.586	40.741	39.364	40.583	NaN	39.176
	38.098	40.063	41.795	40.099	39.56	41.61	39.382	41.505	41.169	40.558	37.113	40.91	37.057	38.258	36.883	37.178	36.017	41.394	41.022	39.974	35.384	39.991
	37.798	39.822	42.055	39.262	40.416	40.686	40.902	39.709	42.155	39.576	36.15	40.379	33.937	37.787	37.705	32.947	35.103	40.954	40.629	39.434	35.953	38.58
	39.011	38.099	42.285	40.605	40.143	41.795	38.172	39.575	42.527	39.919	37.297	40.234	35.251	37.543	37.775	35.297	36.118	40.916	40.545	39.366	34.161	39.323
	40.817	35.95	40.538	38.882	40.572	42.173	39.36	40.097	40.697	40.375	33.813	40.322	35.786	36.724	37.445	34.384	36.76	40.621	40.956	39.813	NaN	39.277
	40.477	39.209	41.975	38.807	40.725	41.73	39.474	40.185	42.711	40.596	38.682	40.112	34.669	37.64	36.918	38.245	34.547	41.292	39.566	41.362	36.997	39.301
	40.523	39.315	41.645	38.234	39.987	41.359	40.061	39.428	42.917	40.62	37.063	41.361	33.912	38.496	37.436	37.133	38.594	40.7	41.024	39.43	33.391	39.766
	40.778	40.003	41.324	39.844	40.3	42.064	39.731	39.934	42.973	39.685	33.992	40.603	37.556	37.349	37.347	38.335	34.017	41.48	41.179	39.538	34.425	39.142
	36.341	38.712	41.582	39.84	40.587	40.814	39.745	40.382	41.845	40.136	35.374	40.193	36.683	37.303	37.54	38.008	36.882	41.884	40.197	39.686	NaN	37.755
	39.971	36.472	41.596	40.075	40.791	41.945	39.49	40.086	42.027	39.567	35.101	39.635	35.727	37.951	36.769	37.72	37.972	41.297	40.199	39.505	34.918	38.394
	41.159	38.936	41.766	40.357	41.234	40.812	39.765	38.769	42.027	40.258	34.306	40.835	36.196	37.528	37.745	35.694	35.177	39.536	40.43	38.809	NaN	38.028
	36.945	38.817	41.926	39.911	40.187	41.61	39.8	40.57	40.757	40.032	34.995	40.782	36.131	38.524	37.376	33.172	38.106	41.104	40.762	40.347	NaN	39.352
	39.316	39.423	40.476	40.178	39.993	40.906	39.703	40.746	42.695	40.328	35.679	40.391	36.456	37.212	36.2	38.154	33.376	41.194	40.034	39.589	33.872	39.097
	40.369	38.776	42.304	40.61	41.041	41.808	40.526	41.159	42.945	40.228	36.249	39.976	35.149	36.362	37.849	37.223	36.607	40.213	40.869	40.001	35.688	39.588
	38.943	38.991	42.02	39.229	39.161	41.46	40.466	40.997	42.676	40.681	36.701	40.598	36.529	37.51	33.333	37.861	36.357	41.992	39.449	40.089	34.969	39.328
	39.989	38.981	41.232	40.898	40.685	42.12	40.581	40.955	NaN	40.501	35.056	40.132	37.831	37.294	35.71	33.467	37.274	40.475	39.967	39.805	NaN	39.62
	40.321	36.939	42.051	41.023	41.416	41.743	40.198	40.066	42.895	40.21	36.281	40.783	37.426	37.837	34.738	36.364	34.751	40.972	40.821	39.096	33.589	40.027
	37.346	38.67	41.739	40.525	40.812	41.503	39.995	40.594	42.418	40.749	38.448	40.654	36.659	36.621	37.833	37.615	38.398	41.017	40.369	40.655	NaN	40.114
	38.536	38.874	41.803	40.209	40.501	41.632	40.154	37.95	42.167	39.618	32.823	41.329	38.101	37.8	34.913	35.701	35.863	41.175	40.589	36.679	NaN	39.735
	38.484	37.8	41.856	39.85	41.003	42.335	39.169	41.039	42.002	40.107	35.319	40.632	NaN	37.36	38.415	34.481	37.662	41.348	40.523	41.357	NaN	39.78
	40.072	39.731	41.989	40.883	40.344	41.867	38.842	40.773	41.977	41.524	34.426	39.918	37.688	37.541	37.167	36.474	38.918	41.134	39.743	40.506	NaN	38.903
	39.601	36.477	41.843	40.229	41.002	42.186	39.07	40.545	42.981	40.647	35.145	39.841	33.933	37.542	38.269	36.455	37.807	40.579	40.723	40.261	NaN	38.21
	40.182	37.649	41.93	40.434	40.077	41.143	39.971	39.861	42.419	38.58	37.749	39.628	34.235	36.965	38.551	34.373	37.712	41.02	40.444	38.176	NaN	38.727
	37.034	38.146	40.956	39.034	40.825	41.052	40.014	38.546	42.343	40.025	38.196	40.245	36.85	37.668	31.351	34.062	38.32	40.733	40.049	40.548	NaN	39.089
	40.02	38.455	42.243	40.706	40.733	41.984	39.87	41.338	42.709	39.476	34.017	40.608	31.834	37.563	35.269	36.419	38.622	41.814	40.055	39.682	36.356	40.043
	39.814	37.296	40.8	40.063	40.699	42.329	38.859	39.671	43.174	39.641	38.573	40.716	NaN	38.091	37.082	38.399	33.711	40.622	40.737	39.655	NaN	38.523
	40.6	37.257	41.438	38.808	40.439	41.476	39.609	40.112	42.247	40.224	35.875	39.944	34.703	37.549	36.256	36.48	38.945	41.515	40.599	39.781	NaN	39.863
	39.386	38.457	41.217	39.25	40.059	42.017	40.307	41.12	42.583	40.956	36.717	40.818	36.102	37.592	33.948	37.206	34.957	41.502	39.581	39.129	NaN	40.829
	38.894	38.769	41.217	39.771	39.659	42.561	38.283	41.609	42.398	40.428	34.297	40.231	NaN	37.526	36.049	38.132	37.771	41.315	39.984	40.227	NaN	39.074
	37.234	39.931	41.985	40.501	40.542	41.429	40.038	40.463	43.113	40.017	39.708	40.663	37.705	36.719	38.296	36.334	38.025	41.369	40.187	37.814	35.643	38.791
	40.493	38.64	41.798	40.115	40.926	41.964	39.442	40.913	42.643	40.716	36.217	40.714	37.04	37.992	37.438	36.876	38.142	40.988	40.551	37.77	NaN	38.843
	40.28	37.631	41.327	40.413	40.426	41.655	39.924	40.853	42.448	40.353	36.607	41.006	35.95	38.015	37.291	37.396	34.073	41.521	40.76	40.35	NaN	39.678
	39.999	39.96	42.095	38.729	41.206	42.385	39.774	39.786	41.778	40.134	35.983	40.532	34.054	38.028	34.028	37.762	37.749	41.812	39.704	39.973	NaN	38.939
	39.46	39.627	41.828	39.662	40.711	42.251	40.394	40.129	42.849	40.399	37.441	40.136	36.877	38.331	37.993	37.489	36.663	41.955	41.176	38.438	NaN	38.762
	36.786	38.184	41.204	41.457	40.381	42.011	38.91	38.881	42.855	40.818	35.779	40.028	37.088	36.902	37.871	35.137	36.996	41.129	39.724	40.288	NaN	39.193
	39.594	37.515	41.814	38.548	40.262	41.606	40.485	40.068	42.859	39.94	37.067	40.481	34.431	36.382	36.658	34.165	38.183	40.135	40.44	39.116	34.211	39.664
	39.145	39.058	41.978	39.12	41.121	42.185	40.363	41.168	42.582	39.055	38.112	41.122	34.813	37.264	36.602	37.328	37.016	41.12	40.47	40.735	NaN	37.096
	41.09	36.324	41.381	39.207	40.27	41.93	40.265	41.371	41.613	39.94	37.293	40.538	36.988	38.541	34.04	34.442	36.808	40.743	40.298	39.498	NaN	39.919
	39.123	39.438	41.571	38.688	40.602	41.872	39.753	39.953	42.86	39.958	35.498	40.899	37.756	37.183	35.277	36.537	36.189	41.686	40.949	39.881	33.782	39.529
	38.616	39.275	41.622	40.131	40.537	41.943	40.65	39.65	41.639	40.72	37.533	39.854	36.28	37.684	35.2	36.717	36.75	40.518	40.87	39.879	33.753	40.148
	39.663	37.826	42.467	39.752	40.425	41.877	40.435	40.921	42.037	40.643	36.856	39.644	36.797	37.967	33.861	37.639	37.641	40.943	40.207	38.766	33.632	39.537
	39.555	39.303	41.617	40.276	40.317	41.747	39.865	40.655	42.573	39.985	34.365	40.365	35.904	36.049	38.414	36.069	35.104	41.886	40.946	38.623	NaN	37.515
	37.527	37.538	41.673	40.825	40.706	41.876	40.319	39.929	42.853	40.181	31.756	39.983	34.946	37.273	36.688	37.296	35.168	41.784	40.837	39.965	NaN	39.478
	39.742	38.788	41.015	39.936	40.947	41.935	39.374	40.255	42.326	39.879	35.496	40.771	37.719	38.121	36.427	37.685	37.218	41.415	39.992	40.339	33.495	35.58
	40.025	39.457	42.13	40.592	40.026	42.236	40.312	39.576	41.969	40.154	37.907	41.079	36.845	36.678	35.81	37.275	37.808	41.327	38.523	40.833	32.113	39.792
	37.931	39.977	42.081	40.35	40.61	41.075	37.918	40.682	42.324	40.077	35.529	40.126	35.997	38.121	37.495	37.533	38.141	41.306	40.737	39.693	NaN	37.631
	39.663	38.049	40.663	39.678	40.695	41.443	40.566	39.858	42.284	40.387	36.231	41.08	37.288	36.757	37.616	35.092	37.838	41.132	41.271	40.235	NaN	39.982
	39.679	39.104	41.583	40.045	40.494	41.626	40.064	40.041	42.153	40.02	34.913	40.494	34.938	37.364	36.847	37.251	37.929	41.576	40.663	35.598	34.317	39.128
	41.427	38.522	40.974	40.878	40.031	41.267	40.234	39.696	42.624	38.808	36.365	40.285	37.03	37.971	30.916	37.109	37.957	41.737	40.706	39.313	35.642	39.314
	39.239	39.279	42.108	40.343	40.648	41.808	40.607	41.176	42.973	41.026	36.893	40.832	37.164	37.057	36.653	33.793	35.084	40.684	39.925	40.026	34.457	39.992
	40.246	37.6	40.649	40.067	40.218	42.061	39.656	39.335	42.473	40.896	36.73	40.111	35.065	38.375	NaN	32.393	34.662	41.684	40.744	40.93	NaN	38.855
	39.851	39.457	41.861	40.006	39.636	41.273	39.914	40.35	42.698	40.653	34.5	40.075	32.363	37.525	37.56	37.688	35.032	41.737	41.188	39.025	NaN	40.249
	39.973	39.052	41.782	40.956	41.187	41.832	39.851	40.09	42.401	39.29	36.909	39.408	37.483	36.96	37.61	37.619	38.203	41.077	40.47	40.47	37.21	38.944
	40.016	38.754	40.934	40.983	40.39	41.694	38.685	40.58	42.148	40.028	34.422	40.103	31.645	38.412	37.374	34.212	36.007	42.269	40.58	40.098	34.401	39.892
	39.78	39.779	41.297	39.085	40.987	41.133	40.002	41.392	42.276	39.755	35.382	39.677	NaN	37.435	36.947	37.298	38.777	41.197	40.375	40.852	34.89	38.512
	40.428	38.152	41.425	39.584	40.569	42.275	39.835	40.347	42.488	40.539	37.481	40.124	36.802	37.887	35.854	37.062	36.448	40.975	39.967	41.001	NaN	38.526
	39.611	36.865	41.959	40.155	40.978	41.857	40.583	39.538	42.803	39.953	35.415	40.578	32.949	38.028	37.304	35.465	37.604	40.65	40.849	39.134	35.475	40.489
	38.818	37.228	42.697	41.011	40.12	41.292	40.427	40.743	43.082	40.552	38.891	40.317	38.016	37.788	37.393	36.525	37.397	41.29	41.327	40.397	NaN	38.835
	40.152	39.001	41.412	40.257	40.52	41.147	39.295	40.057	NaN	39.864	36.965	40.322	36.131	37.814	35.142	36.806	37.748	41.149	39.949	38.623	37.622	39.018
	41.554	38.506	41.581	40.241	40.782	41.758	40.239	40.654	42.244	39.444	37.173	40.115	36.94	38.142	36.751	38.06	38.716	41.014	40.936	39.868	NaN	36.024
	38.02	38.513	42.051	40.215	40.367	41.07	40.473	40.715	NaN	39.201	38.216	39.788	34.998	36.717	35.534	36.014	36.234	41.492	40.663	40.06	35.703	38.969
	38.817	37.917	41.846	40.841	40.14	41.584	39.302	40.303	42.355	40.127	37.765	39.182	NaN	36.901	36.572	36.318	34.574	41.766	40.322	39.85	NaN	40.145
	37.911	38.123	41.078	38.524	40.987	42.329	39.1	40.875	42.022	40.454	34.118	40.322	34.308	38.419	36.89	35.737	37.922	41.629	40.212	40.664	NaN	39.886
	40.117	36.912	41.617	40.166	40.371	41.518	39.34	40.79	NaN	40.19	35.216	39.758	NaN	36.897	35.373	34.846	NaN	40.423	40.425	39.907	34.388	38.357
	40.446	38.923	42.082	39.748	41.007	41.68	39.786	40.856	42.596	40.298	36.75	40.561	34.918	38.903	36.743	37.613	36.161	39.795	40.107	38.077	34.586	39.072
	38.4	38.909	41.89	40.744	40.943	41.173	40.417	40.605	41.809	40.683	35.042	39.798	36.059	37.107	36.811	38.496	36.502	40.985	40.731	40.44	34.67	39.144
	40.778	38.552	41.892	37.631	39.97	41.673	40.47	38.806	42.364	40.763	34.146	40.062	34.803	37.841	35.9	32.923	35.44	40.82	39.858	40.774	34.361	39.431
	38.438	38.174	41.243	40.931	40.882	41.535	40.08	41.019	42.169	40.734	38.547	40.487	35.901	36.544	35.561	36.534	36.897	41.14	40.095	40.59	NaN	38.38
	39.31	39.774	42.421	38.382	40.354	41.076	38.207	39.444	42.409	39.244	36.919	40.871	37.171	38.066	36.239	34.728	34.653	40.851	40.201	36.887	35.656	39.658
	38.104	39.288	42.252	40.502	40.279	40.784	39.554	39.692	42.019	40.237	36.764	39.709	35.259	37.588	36.65	38.338	36.526	40.361	40.396	37.283	NaN	38.63
	40.472	39.342	41.232	39.896	40.094	41.146	40.253	41.538	42.494	41.06	36.864	39.358	36.87	37.832	35.842	37.576	38.374	41.283	40.161	40.762	NaN	38.686
	40.508	37.259	41	40.332	40.782	41.692	40.571	40.37	42.373	40.789	37.32	39.552	35.157	38.005	33.529	34.932	37.836	41.481	39.981	37.47	NaN	39.133
	38.614	38.692	41.941	40.286	40.469	41.642	39.613	40.689	42.533	40.566	38.707	40.466	34.653	38.124	37.635	36.391	38.162	42.003	40.122	38.503	34.697	39.427
	39.501	38.227	41.866	40.275	40.337	41.374	40.222	40.125	42.327	40.445	37.363	41.121	36.304	37.269	36.825	36.276	37.726	40.977	40.404	39.893	NaN	39.143
	41.058	38.004	42.012	39.425	39.243	41.533	39.784	41.021	42.543	40.56	38.102	40.459	35.432	37.123	36.041	37.371	37.132	41.838	41.114	40.063	35.311	38.652
	40.353	38.131	41.291	41.234	40.577	41.246	40.726	39.264	42.088	41.145	35.7	39.546	37.594	36.594	37.932	37.174	36.262	41.235	40.915	39.557	NaN	40.268
	40.047	39.562	41.524	39.968	41.028	41.552	40.469	40.057	42.101	40.405	36.301	39.931	35.862	37.809	37.726	37.025	34.402	39.988	39.842	39.246	NaN	39.578
	39.192	38.116	42.103	40.642	40.569	41.48	39.018	39.129	42.755	40.721	36.764	40.392	35.017	38.117	37.086	34.932	37.644	40.826	39.978	40.618	NaN	40.119
	41.086	37.868	42.226	41.181	40.755	41.915	39.683	41.298	42.018	39.364	38.305	41.072	32.953	37.467	36.309	37.617	38.125	42.224	40.164	39.094	NaN	39.572
	40.994	38.55	42.165	40.6	40.749	41.825	39.581	41.215	42.416	40.589	32.708	38.837	37.188	38.468	38.328	38.503	37.704	40.877	41.15	38.471	NaN	39.2
	37.854	38.95	41.558	40.152	41.035	41.268	38.923	41.079	41.908	41.23	36.104	40.165	35.091	38.199	38.091	38.769	35.701	41.111	39.716	38.468	33.948	39.288
	40.255	38.652	42.414	40.232	40.321	40.98	39.413	38.683	42.653	40.79	37.132	40.915	36.413	37	33.502	37.086	37.694	40.649	40.632	38.551	32.468	39.068
	40.221	38.644	41.755	40.68	39.735	40.866	39.727	41.362	42.853	40.963	38.305	40.685	37.198	36.647	34.926	37.336	38.101	40.84	41.055	40.695	NaN	38.736
	40.394	39.858	42.159	40.272	40.572	40.953	39.525	38.177	42.435	38.775	36.816	39.766	34.966	37.203	36.666	37.99	37.212	40.995	40.475	40.005	33.73	38.263
	38.945	38.592	42.306	40.198	40.574	41.472	40.667	41.009	41.982	40.293	32.989	40.34	34.515	35.132	33.883	33.858	38.125	40.654	39.689	40.533	37.836	38.898
	39.149	39.287	41.056	38.706	40.833	41.248	40.548	40.068	42.425	41.024	35.5	39.712	35.603	36.97	37.838	33.797	38.689	40.983	39.5	41.049	NaN	40.2
	40.554	40.074	41.411	40.82	40.811	40.799	40.614	40.178	41.605	40.871	36.162	40.071	35.157	37.958	35.886	37.018	36.844	40.845	41.16	39.695	NaN	40.041
	40.417	38.634	40.847	40.788	40.839	41.161	40.164	41.037	42.686	40.171	37.106	38.844	36.676	37.462	34.579	37.536	37.817	41.36	40.939	38.616	NaN	40.331
	40.137	38.97	41.643	39.251	40.709	41.805	40.47	40.946	42.306	40.851	35.091	41.208	35.329	37.179	38.303	37.676	36.988	41.273	40.694	39.822	NaN	39.263
	40.286	37.642	40.656	40.012	40.138	41.278	40.59	39.677	42.07	40.213	36.483	40.45	36.692	37.279	35.686	36.937	38.117	40.943	40.069	39.835	31.47	38.742
	40.536	39.257	42.063	39.545	40.037	42.149	40.414	41.414	41.477	40.261	35.859	40.111	37.115	37.32	36.611	36.972	37.922	40.546	41.298	40.372	NaN	39.236
	39.521	39.768	42.057	39.608	40.178	41.98	39.649	40.692	42.473	39.827	38.422	40.119	NaN	36.452	36.447	35.682	37.898	41.204	40.918	39.094	36.764	38.292
	40.487	38.824	40.878	41.548	39.888	41.353	39.101	40.857	42.678	39.405	36.892	39.644	NaN	37.813	32.765	35.904	37.454	41.02	41.111	40.865	NaN	39.25
	40.109	38.895	42.145	40.172	40.064	41.546	39.46	40.304	42.754	39.847	37.042	39.493	35.562	37.673	38.113	36.78	38.861	40.367	40.191	39.569	NaN	39.344
	39.52	37.109	42.013	39.047	39.716	41.633	39.859	38.814	41.498	40.858	33.881	39.392	NaN	36.657	37.445	37.699	38.063	41.862	41.342	39.885	36.213	37.977
	39.743	37.705	42.149	39.825	40.454	40.803	40.198	39.472	42.835	39.785	34.497	41.254	34.206	36.575	38.434	37.104	36.229	40.206	40.315	39.268	NaN	39.351
	39.56	39.034	41.538	38.919	40.375	41.275	39.799	38.19	41.996	39.944	34.5	40.847	36.157	37.752	35.422	35.75	37.125	41.407	40.218	39.771	NaN	39.741
	39.801	39.375	41.502	40.57	39.784	41.457	40.308	39.97	42.744	40.752	37.248	40.917	35.726	37.504	38.293	37.845	36.786	40.934	40.888	39.627	NaN	40.836
	40.731	38.232	40.557	40.482	40.237	42.297	40.054	40.22	41.8	39.343	36.888	40.743	37.654	37.752	36.409	34.994	37.48	40.674	40.776	38.732	NaN	39.446
	39.978	38.54	41.81	39.197	40.636	41.745	39.224	41.22	42.355	40.596	37.297	40.375	38.033	38.538	31.502	35.318	35.979	41.472	40.788	37.159	36.137	39.446
	40.81	38.764	42.199	40.883	40.202	41.219	40.629	40.933	42.252	40.063	32.223	39.977	36.342	37.889	35.267	35.326	36.051	40.558	40.337	41.188	31.552	38.973
	40.151	37.816	42.343	40.377	40.403	41.734	39.988	40.311	42.334	39.277	36.931	40.51	36.239	38.26	36.318	32.446	38.417	41.362	40.27	39.078	NaN	39.234
	35.693	40.102	42.087	40.61	40.236	41.483	40.879	41.202	42.623	40.115	37.659	40.337	33.395	38.015	38.504	35.516	38.428	40.543	40.292	39.482	NaN	37.455
	36.38	40.234	42.376	40.153	41.41	40.857	39.785	40	NaN	41.069	37.11	41.077	35.763	36.735	36.219	36.1	38.712	41.62	40.399	40.052	NaN	38.507
	39.49	36.333	41.374	40.544	40.613	41.688	38.861	40.104	42.998	40.603	34.575	40.185	36.73	37.615	35.337	38.766	36.048	41.091	40.878	38.865	32.66	38.127
	40.757	39.271	41.974	40.448	39.873	41.644	40.092	39.605	40.479	40.76	37.044	41.066	35.008	38.238	37.72	38.092	34.639	41.474	40.385	39.788	NaN	38.396
	39.894	39.47	41.604	39.684	41.212	41.289	40.18	41.444	41.955	40.069	34.706	41.228	34.736	37.331	36.449	32.481	38.786	41.225	40.313	37.321	NaN	39.818
	38.487	39.399	41.237	40.683	39.442	41.827	39.375	39.803	42.158	39.733	37.454	39.948	32.783	38.113	34.469	35.973	37.888	41.503	40.559	38.368	NaN	39.26
	41.28	39.793	40.918	40.654	40.553	41.295	40.268	40.778	41.88	39.518	35.907	40.05	33.496	38.329	35.82	37.815	36.093	40.16	40.855	38.595	NaN	38.282
	40.711	39.183	41.646	40.973	40.551	42.445	39.996	40.935	42.935	40.325	38.752	41.046	32.359	36.935	36.736	36.625	38.466	40.495	40.917	39.815	37.793	38.563
	39.639	39.173	41.671	39.705	40.308	41.799	40.272	39.446	42.296	40.822	33.942	40.449	37.565	38.047	32.245	37.796	35.514	41.012	40.025	37.145	33.476	39.319
	40.354	37.378	41.42	39.382	40.76	42.228	39.952	41.246	41.816	40.46	33.292	40.863	34.901	36.086	37.041	38.859	35.527	42.139	40.497	39.196	NaN	39.618
	39.243	39.882	41.566	39.939	39.032	41.598	39.008	39.979	42.423	39.929	32.901	40.145	38.382	37.17	37.023	36.63	37.069	40.581	40.13	41	NaN	39.965
	40.398	38.135	42.159	39.273	40.448	41.84	39.727	39.778	42.131	41.11	37.91	40.255	36.813	38.882	37.987	38.9	35.207	41.258	41.23	39.033	NaN	39.334
	38.474	39.24	41.891	40.921	40.623	41.131	39.936	40.565	41.818	40.686	NaN	40.302	NaN	37.433	37.267	37.219	38.077	41.184	40.995	37.897	35.052	39.265
	38.895	39.46	41.877	40.248	40.21	42.036	40.086	41.618	42.667	40.282	37.877	39.586	33.29	38.317	38.69	38.31	34.723	41.322	39.928	36.606	NaN	39.776
	39.609	39.374	41.827	39.269	40.076	41.448	40.195	40.828	41.94	40.731	35.345	40.535	36.904	38.036	31.941	34.055	38.078	40.786	40.419	40.929	36.62	39.088
	39.937	37.344	41.979	40.034	41.386	41.837	40.633	41.248	42.263	38.795	35.757	40.33	36.491	37.483	36.487	37.536	38.873	41.086	41.298	39.658	NaN	38.566
	38.554	37.13	42.16	38.001	41.159	41.383	39.486	41.454	43.048	40.557	37.848	40.555	37.757	37.973	37.756	37	37.27	40.866	41.019	38.834	NaN	38.674
	40.756	39.113	41.832	41.05	41.151	41.226	39.048	39.961	42.674	40.729	37.485	40.495	37.138	36.938	35.158	36.29	38.292	40.603	40.045	39.171	NaN	39.988
	39.882	39.238	42.254	39.371	40.869	41.906	40.316	40.827	41.602	41.003	35.384	41.279	35.713	37.43	36.755	36.978	36.384	41.191	40.011	40.185	NaN	38.264
	39.841	38.848	42.228	39.662	39.578	41.264	40.478	40.653	41.239	39.862	35.111	40.482	36.922	37.289	38.176	38.174	NaN	40.376	40.038	39.34	NaN	39.477
	40.915	40.072	42.774	38.785	40.59	41.216	40.301	39.684	41.009	38.998	33.339	40.709	33.286	36.067	38.122	37.751	39.092	40.2	40.881	34.488	NaN	40.527
	37.766	38.703	42.183	40.357	40.855	41.279	40.377	41.262	41.5	40.668	37.071	39.845	38.013	37.714	37.047	37.372	37.994	40.277	41.335	40.284	NaN	38.883
	40.61	37.661	42.118	41.003	41.32	41.997	40.517	41.301	42.672	40.563	37.646	40.264	32.916	36.289	35.514	32.547	36.428	41.576	39.696	40.292	36.582	40.785
	40.204	37.168	42.489	38.986	40.575	41.882	40.262	40.843	42.787	39.731	35.256	39.7	36.102	37.285	37.193	36.404	38.344	41.122	40.875	40.276	33.347	39.553
	38.891	38.329	42.099	39.009	39.746	41.158	39.838	39.866	42.62	40.468	35.287	40.758	34.602	37.503	35.705	38.115	38.837	41.477	40.352	39.625	NaN	38.372
	40.153	39.798	42.336	40.662	39.609	42.008	39.163	41.048	42.489	40.193	37.575	40.143	35.703	38.634	33.432	36.569	38.192	40.069	40.977	40.244	NaN	38.297
	38.02	36.681	41.325	40.859	41.216	41.689	39.973	40.095	42.934	40.221	34.238	40.199	36.582	37.74	37.395	38.398	37.06	40.11	39.957	39.51	NaN	39.057
	39.16	38.39	42.091	40.072	39.914	41.531	38.869	41.522	42.313	39.996	37.464	40.784	36.861	37.709	35.608	36.854	35.53	40.793	40.736	39.806	NaN	39.252
	38.22	37.457	42.134	40.665	40.045	41.73	39.58	41.032	42.463	40.578	36.936	41.143	36.743	37.476	36.694	38.414	36.364	40.824	40.602	39.718	35.834	37.921
	39.688	37.264	41.465	40.684	39.843	42.08	39.937	39.345	42.83	40.39	38.092	40.066	33.476	38.084	35.821	38.175	35.527	41.923	40.412	39.178	NaN	39.588
	38.512	37.163	41.465	40.399	40.816	41.343	39.242	39.222	42.409	40.734	37.306	40.388	33.324	37.48	37.27	36.845	38.999	41.722	40.345	39.821	NaN	40.112
	39.039	39.518	42.277	40.165	39.389	42.334	40.007	39.527	41.527	40.625	36.646	39.795	31.216	37.222	37.217	36.945	38.726	40.63	40.233	38.477	NaN	38.635
	40.778	38.996	41.11	40.742	40.924	41.048	40.188	40.674	42.52	39.988	35.572	41.188	36.615	38.467	36.609	36.776	36.564	40.91	40.001	40.305	34.923	39.492
	36.419	37.191	41.692	40.606	40.875	40.935	39.621	41.365	42.357	40.596	36.677	40.546	33.767	36.465	37.893	35.894	37.817	41.332	39.946	38.718	NaN	38.499
	40.783	38.149	41.509	39.057	40.479	41.486	40.631	40.863	40.918	39.57	38.077	40.492	NaN	36.64	35.176	35.161	35.772	41.092	40.765	39.97	37.229	38.83
	39.369	38.424	41.393	40.316	41.206	40.681	39.621	40.927	NaN	39.759	37.621	41.144	NaN	36.366	37.862	35.228	37.989	41.578	38.398	38.967	NaN	39.733
	41.001	39.366	41.174	40.826	40.749	41.751	38.174	39.33	42.232	40.015	36.106	41.08	35.116	38.055	34.864	35.201	37.809	40.904	40.128	41.181	NaN	38.691
	40.143	39.396	41.192	38.681	40.834	41.695	40.406	39.375	42.03	40.642	37.085	40.699	37.607	38.346	34.077	37.008	37.705	40.457	41.386	39.942	31.664	39.526
	41.057	38.229	41.51	40.214	40.986	42.3	39.642	40.298	40.791	39.926	36.782	40.495	36.147	36.811	34.189	36.447	38.177	41.698	40.309	39.789	NaN	39.095
	40.392	39.011	42.3	39.497	39.085	41.744	39.872	39.446	42.057	40.434	NaN	39.729	37.329	38.596	38.112	37.181	36.859	42.257	40.648	37.347	32.166	38.637
	40.589	38.083	41.783	39.397	38.749	41.213	38.928	41.438	42.586	40.052	37.617	40.027	35.845	37.423	37.613	37.212	35.974	41.767	40.21	38.667	NaN	38.697
	39.202	39.106	41.79	38.769	40.651	41.787	39.075	40.053	42.807	40.549	33.65	39.994	37.659	37.87	37.63	38.304	33.704	41.257	40.442	40.017	NaN	37.909
	36.163	36.916	42.035	40.579	40.112	41.53	39.739	41.186	42.539	40.384	38.157	39.322	33.922	38.047	32.225	36.645	34.223	40.613	40.519	40.96	35.503	38.175
	38.366	36.901	42.08	41.562	40.494	41.45	38.825	40.336	42.503	40.407	35.221	40.496	33.658	37.627	36.114	36.227	36.256	40.814	40.294	38.639	33.368	39.936
	40.613	36.205	42.178	40.928	40.088	41.151	40.168	40.587	42.587	39.169	38.278	39.718	36.8	36.346	34.808	36.816	38.095	41.358	40.49	41.294	35.438	39.606
	38.907	38.358	42.093	39.749	40.088	41.455	39.657	40.688	42.926	41.506	36.541	40.373	37.494	37.852	36.942	38.073	NaN	41.655	40.444	40.304	NaN	39.447
	40.092	39.056	41.958	41.025	40.002	41.634	39.74	41.555	42.987	40.749	36.063	40.091	34.124	37.452	36.907	37.273	37.348	40.043	40.177	38.959	NaN	39.657
	37.062	37.416	40.775	39.345	40.011	41.418	39.996	39.589	42.639	41.043	36.519	40.86	35.194	38.071	36.405	34.567	37.754	41.721	40.53	39.084	34.874	39.589
	41.12	37.19	41.188	39.263	40.481	41.763	39.454	40.088	42.658	39.859	36.159	40.934	35.464	37.368	37.746	38.372	39.009	41.839	40.911	40.772	NaN	39.375
	39.327	38.729	41.591	39.162	40.688	41.679	40.546	40.132	42.052	39.473	37.831	41.177	36.267	36.486	37.417	37.197	37.88	41.647	41.187	40.881	NaN	40.111
	38.98	38.198	41.797	40.795	40.765	41.39	39.44	40.602	42.503	40.43	38.444	40.388	37.41	37.75	37.214	36.662	35.478	41.245	40.787	39.943	NaN	39.851
	40.014	37.741	41.853	40.137	41.302	42.167	39.947	40.109	42.377	39.727	37.245	40.446	NaN	37.996	37.529	34.096	36.39	41.622	40.18	40.657	35.079	39.19
	39.568	40.625	41.763	40.667	40.817	41.746	38.733	40.389	42.095	40.589	35.625	40.756	NaN	34.887	37.461	35.61	38.814	41.373	40.972	38.656	NaN	39.645
	37.403	38.663	41.384	39.536	39.987	41.374	38.763	41.362	42.845	39.286	35.238	40.073	33.373	37.979	36.695	35.398	36.211	40.34	40.907	39.457	33.256	39.638
	40.926	39.283	41.864	39.705	39.654	41.409	39.734	40.53	42.169	40.542	35.333	41.319	35.976	36.567	35.387	34.276	36.172	41.7	40.715	38.951	NaN	39.025
	40.074	40.099	42.105	39.918	41.084	41.694	40.186	40.154	NaN	39.65	NaN	39.768	37.188	36.539	37.294	36.666	37.427	41.428	39.452	40.1	NaN	39.486
	40.764	38.942	42.608	39.962	41.062	41.83	39.287	40.875	42.731	39.767	36.656	40.498	35.957	37.941	35.672	36.986	38.517	41.525	40.384	40.496	NaN	40.24
	39.943	37.227	41.707	38.471	40.641	41.982	39.803	38.675	42.027	40.598	37.296	40.212	33.194	37.064	36.094	36.34	36.286	40.269	39.879	39.374	36.582	39.332
	39.513	38.064	41.939	39.159	41.264	41.693	40.073	40.412	42.451	41.097	35.866	40.608	36.122	37.783	37.397	34.489	36.509	40.789	39.325	40.41	NaN	36.757
	40.209	39.665	41.798	40.652	41.161	41.994	39.804	40.651	41.854	39.681	36.602	40.109	NaN	37.031	37.418	37.223	35.577	40.566	40.681	39.546	NaN	39.396
	39.938	38.286	40.663	40.162	39.893	40.918	40.27	39.292	42.467	39.491	37.174	40.287	37.65	37.708	34.835	35.133	36.329	41.41	40.23	39.352	35.357	39.595
	39.901	38.813	41.136	39.867	39.938	41.435	39.739	41.083	42.985	40.247	36.948	41.016	33.983	37.765	37.151	38.243	38.131	40.521	41.686	40.465	NaN	39.438
	38.76	38.385	41.358	41.002	40.902	41.578	39.099	40.469	41.546	40.482	37.369	40.355	35.758	38.09	34.145	37.618	37.715	40.345	41.005	39.469	NaN	38.297
	38.308	36.304	41.812	40.388	40.472	41.465	39.554	40.725	41.614	40.363	34.999	40.546	35.055	37.889	36.875	36.811	33.937	40.903	40.721	40.184	35.957	38.692
	41.119	38.275	40.668	38.802	40.332	42.246	40.464	39.984	42.996	40.455	38.04	40.951	34.63	37.347	35.64	35.629	37.337	41.231	40.126	40.734	NaN	39.092
	40.143	36.711	41.268	41.098	40.792	41.224	39.615	39.982	42.557	40.621	36.375	41.11	32.616	36.193	33.495	35.925	37.807	40.331	40.535	40.113	NaN	39.705
	38.039	39.452	42.487	40.942	40.88	42.011	39.082	40.053	42.769	40.258	36.792	40.676	33.604	37.965	34.657	37.347	36.119	41.31	40.573	36.413	NaN	38.963
	38.888	38.261	41.879	40.588	39.908	42.016	40.57	39.727	42.194	39.661	36.621	40.697	38.01	36.945	36.172	34.12	38.122	40.553	39.362	38.612	33.163	39.631
	38.895	38.329	42.498	40.968	40.075	41.499	40.196	39.276	42.688	41.22	34.945	40.479	33.708	38.548	38.164	35.871	37.34	40.666	39.974	38.63	NaN	40.092
	40.207	37.816	41.667	39.255	40.542	41.883	39.479	38.965	42.576	40.429	38.526	40.653	32.938	36.936	35.797	36.774	35.64	41.097	40.627	38.522	NaN	39.554
	41.37	40.201	41.922	40.451	40.46	41.117	39.829	40.315	41.595	40.17	37.771	41.069	36.665	37.891	38.23	35.961	36.414	41.015	40.796	41.255	NaN	40.413
	37.133	38.664	41.893	39.3	40.925	41.167	39.075	40.606	42.737	40.335	36.887	39.729	36.59	37.39	37.415	34.303	37.615	41.111	39.797	39.452	36.075	39.198
	38.944	39.352	41.865	40.069	39.492	41.545	38.629	40.002	NaN	39.87	35.355	40.381	37.975	37.412	35.439	37.107	35.232	41.176	41.052	41.043	33.281	37.458
	40.73	39.149	40.872	39.52	40.701	41.703	40.683	40.636	41.822	40.605	36.355	39.711	35.704	37.09	36.76	36.462	35.207	40.066	41.544	38.941	35.129	39.406
	40.213	37.17	41.957	39.152	41.626	41.885	39.959	40.498	41.931	40.315	37.539	40.63	33.118	36.633	36.719	34.144	38.567	40.859	40.763	41.197	NaN	39.526
	40.809	39.794	40.995	41.057	40.08	41.142	40.281	39.361	41.661	39.663	37.811	40.147	37.44	37.584	35.828	37.462	38.187	41.397	40.637	40.885	NaN	40.202
	40.377	37.914	42.217	37.901	39.468	41.049	39.979	38.626	42.772	39.749	36.719	40.359	36.673	37.614	35.337	37.249	38.986	42.087	40.134	38.996	NaN	40.019
	40.013	39.076	41.3	41.028	39.619	41.403	39.89	40.747	42.458	40.551	38.339	39.916	34.404	37.713	31.894	38.023	37.819	40.337	40.29	38.873	NaN	40.085
	39.937	38.063	41.999	38.802	40.944	41.621	39.453	40.813	42.064	40.489	36.545	40.113	37.147	37.153	35.606	36.365	37.12	40.603	40.971	40.359	32.085	37.733
	40.423	38.988	41.371	38.103	39.691	42.01	39.833	40.418	42.706	40.427	36.367	39.574	36.691	38.195	37.653	37.825	37.933	41.455	41.164	39.829	NaN	38.225
	38.841	39.253	41.706	39.921	39.982	41.557	39.684	41.067	42.636	39.05	35.686	40.848	35.375	37.301	37.396	35.806	38.876	40.975	40.79	38.811	35.542	40.52
	40.174	39.249	41.795	40.364	40.488	41.586	40.487	40.984	42.489	40.186	37.186	40.648	35.043	37.721	35.265	36.807	37.654	41.592	40.468	40.186	NaN	38.003
	40.753	38.988	41.28	40.277	39.834	41.999	39.538	40.407	42.238	40.215	35.464	40.43	36.391	37.183	37.236	37.823	36.257	40.035	40.244	39.323	NaN	40.023
	39.96	37.869	41.86	40.39	40.467	41.677	40.276	40.873	42.198	40.471	35.164	40.332	34.997	37.416	37.909	37.318	37.239	41.908	39.616	39.219	NaN	39.738
	36.633	40.543	41.388	39.986	40.116	41.09	40.148	40.114	42.429	39.829	37.089	40.549	36.082	38.134	36.543	34.466	35.475	40.607	40.764	41.408	NaN	38.262
	40.876	39.919	42.065	40.254	40.524	41.522	39.462	40.893	42.6	40.483	34.239	40.598	37.964	38.562	36.939	36.196	38.402	40.896	40.196	38.238	31.966	39.339
	38.685	39.196	41.828	39.129	39.771	41.704	39.558	40.403	42.252	40.244	37.114	40.88	33.553	37.823	32.619	36.595	37.662	40.997	41.022	38.253	32.275	36.408
	39.297	38.08	40.871	37.763	40.356	42.214	40.161	40.41	41.055	40.951	38.707	40.406	35.645	37.903	38.174	36.851	37.31	41.141	40.318	39.379	NaN	40.315
	36.694	38.713	42.008	39.229	40.215	41.656	40.172	40.147	42.348	40.963	37.311	40.144	36.544	38.182	37.158	36.415	38.644	40.691	39.952	40.605	33.961	38.938
	39.351	38.807	41.719	38.099	40.679	41.716	38.145	40.979	42.497	40.604	37.034	40.495	35.077	36.253	36.604	36.864	37.45	41.086	40.3	39.309	32.732	39.272
	40.427	38.389	41.653	40.819	40.538	41.205	39.737	40.659	42.862	40.347	37.498	40.742	34.323	36.581	37.649	37.423	37.905	40.852	39.989	40.569	NaN	39.877
	39.22	39.26	41.343	39.313	41.127	42.275	40.052	39.844	41.9	39.542	35.115	39.829	37.861	36.188	36.961	31.766	34.433	41.102	41.105	38.106	NaN	39.6
	38.363	37.875	42.273	39.971	41.235	41.829	40.523	40.732	42.751	40.209	36.728	41.024	36.186	37.316	35.731	36.992	38.338	40.786	40.866	39.094	34.433	38.704
	38.483	36.377	42.189	40.465	41.167	41.597	39.975	40.363	42.931	39.943	36.164	40.586	34.81	36.396	36.345	37.254	35.447	41.182	39.07	40.65	NaN	39.731
	40.808	37.361	41.964	41.193	40.753	41.108	40.187	40.386	42.879	40.165	37.387	40.795	37.044	38.138	36.992	34.06	38.894	41.162	41.065	38.704	31.405	38.756
	40.292	38.971	41.585	40.955	40.563	42.115	39.28	40.025	42.286	40.711	35.871	40.482	32.743	38.076	34.772	36.372	35.094	41.426	39.897	38.07	33.225	39.92
	38.181	37.838	41.232	39.417	39.865	41.138	39.052	40.107	NaN	39.393	35.219	40.385	36.046	37.977	34.234	36.681	38.611	41.791	41.025	40.342	NaN	38.585
	37.431	39.214	42.365	38.922	40.684	42.13	39.932	41.623	NaN	40.881	36.16	40.19	34.75	38.152	36.648	38.001	36.7	40.571	40.09	40.102	NaN	38.95
	38.47	39.006	41.071	40.826	39.244	41.823	40.442	40.507	41.72	41.008	34.434	39.709	32.73	38.016	37.797	36.143	33.381	41.679	40.294	38.219	NaN	39.681
	38.82	39.507	41.999	40.46	40.402	41.573	40.123	41.215	42.263	39.596	35.163	40.569	34.605	37.494	38.006	33.919	34.172	42.021	39.972	39.821	NaN	39.223
	40.321	35.894	41.413	39.417	40.752	40.929	40.015	40.125	42.27	39.131	34.256	40.218	34.983	37.898	36.888	35.881	35.955	40.783	39.85	38.178	33.281	38.811
	38.604	38.851	41.637	40.085	39.616	40.894	40.055	41.117	42.836	39.6	36.923	39.782	36.03	37.973	37.455	36.631	NaN	40.976	40.666	38.937	36.539	37.188
	41.512	37.36	41.634	39.156	39.692	41.934	39.838	40.33	42.454	40.485	35.182	41.066	NaN	36.059	34.541	37.729	37.354	41.749	40.64	38.346	33.985	38.289
	40.644	39.081	42.346	40.583	40.272	41.403	40.424	40.807	42.308	40.053	36.368	40.411	31.422	38.272	35.721	37.087	35.001	41.483	41.173	36.568	NaN	40.632
	38.885	37.935	41.095	39.781	39.884	41.911	39.748	41.035	42.719	39.965	37.348	40.326	37.374	36.896	38.424	35.811	37.615	41.335	40.67	41.027	NaN	40.439
	39.992	39.214	41.241	41.648	40.682	41.992	39.423	40.765	42.122	40.962	35.444	40.087	35.402	36.041	36.774	34.938	37.947	40.987	40.421	39.488	NaN	40.384
	37.572	39.451	41.927	41.048	41.03	41.353	39.859	41.564	41.775	40.773	33.291	40.432	32.892	36.717	34.316	36.346	37.412	41.495	39.917	39.549	NaN	40.427
	40.586	39.002	41.771	40.058	40.951	41.706	39.973	40.934	41.869	40.882	36.035	41.019	34.478	38.056	37.704	38.224	37.704	40.947	40.053	38.887	NaN	38.644
	41.523	37.024	41.369	41.068	40.956	41.37	39.18	40.902	42.866	40.186	36.125	39.753	36.92	36.76	36.213	37.812	38.63	40.924	40.777	39.793	NaN	38.669
	39.252	38.901	40.948	40.039	40.309	41.19	40.203	40.282	41.76	40.642	37.848	40.569	34.273	36.724	37.64	33.59	34.336	41.029	40.468	34.277	NaN	39.143
	39.309	38.598	41.101	41.266	41	41.533	39.963	40.871	42.574	39.986	36.981	40.312	35.802	37.763	35.959	34.676	38.418	40.761	41.329	40.277	32.184	39.331
	40.219	40.051	41.709	39.672	41.138	41.303	39.306	40.387	42.353	40.236	36.714	39.814	33.086	36.617	31.703	36.967	37.933	41.4	39.998	40.473	NaN	39.258
	40.751	39.684	42.259	39.659	40.113	41.975	39.93	40.724	42.929	39.364	39.026	39.464	33.385	38.096	37.801	34.698	37.96	40.837	40.566	39.438	33.797	39.332
	39.908	39.46	40.507	38.134	41.774	41.344	39.05	39.793	41.749	40.594	38.871	41.416	36.748	37.533	37.747	37.68	37.86	40.65	40.63	37.834	NaN	40.366
	40.894	39.477	41.629	38.522	40.181	41.222	39.82	39.986	42.973	39.723	35.822	41.108	36.671	38.468	38.176	37.81	37.322	41.119	40.93	38.425	NaN	39.823
	40.977	38.623	41.92	40.743	40.893	41.785	38.848	38.811	42.136	40.314	37.554	40.485	36.742	37.488	37.035	37.979	38.248	41.03	41.226	38.437	34.948	38.104
	40.676	39.334	42.518	39.431	40.563	41.551	39.634	40.222	41.395	40.247	37.983	39.673	35.505	38.488	34.072	36.229	36.63	41.265	39.171	39.388	NaN	39.589
	38.695	38.9	41.754	38.747	41.659	42.119	40.275	39.205	42.12	40.656	37.442	40.535	33.339	36.9	37.224	37.903	38.234	41.35	41.339	40.277	NaN	39.49
	40.314	37.133	41.98	39.885	40.943	41.77	39.722	41.362	42.76	40.793	34.496	40.59	36.931	37.178	36.78	37.632	38.559	41.479	39.927	38.53	35.128	38.755
	41.278	36.777	42.277	39.258	40.625	41.36	40.846	40.701	42.623	39.332	36.951	40.808	36.405	37.489	35.467	36.527	38.484	40.512	40.915	38.965	36.035	39.952
	39.204	38.813	41.378	40.585	40.968	41.327	39.393	41.209	42.007	39.035	37.708	40.515	38.355	37.634	32.528	32.653	36.47	40.363	40.981	40.282	NaN	39.204
	40.038	38.659	40.846	40.354	40.058	41.525	40.547	40.804	42.348	40.31	33.93	39.937	37.536	36.028	35.638	37.056	38.076	41.632	40.967	34.709	31.779	39.531
	40.219	37.506	40.957	41.215	40.22	41.868	40.347	38.633	42.68	40.316	36.393	40.545	35.988	36.461	35.942	35.201	36.015	41.075	41.262	40.854	32.034	38.666
	39.988	39.625	41.289	40.134	40.348	41.957	39.761	39.899	42.251	40.198	35.803	40.751	35.034	38.317	36.777	36.932	33.565	40.186	40.314	40.178	NaN	39.485
	38.15	37.967	42.165	40.346	40.489	41.435	38.977	40.819	NaN	41.432	36.833	40.829	37.388	37.108	38.499	32.228	34.878	41.345	40.605	39.4	35.338	39.534
	40.306	38.536	41.229	41.652	39.858	41.169	40.498	41.41	42.723	40.89	37.201	39.847	36.153	37.549	36.051	38.433	38.137	40.645	39.278	39.487	NaN	40.083
	37.399	38.244	41.618	40.304	40.973	40.991	39.797	41.071	42.929	40.72	36.237	39.991	37.544	36.413	34.07	35.632	35.994	40.399	40.727	40.15	NaN	39.106
	40.977	39.296	41.462	40.045	40.742	41.883	39.817	40.058	42.585	40.118	36.572	41.243	34.429	37.333	37.767	34.943	36.949	40.535	40.706	38.404	32.481	39.941
	38.471	38.175	42.316	40.015	40.461	41.57	39.963	39.696	42.444	41.192	39.424	41.178	37.062	36.176	36.006	37.923	39.186	41.918	40.89	38.837	32.758	37.993
	40.15	38.968	41.547	40.876	40.996	41.883	40.078	41.341	42.216	40.256	35.578	40.181	32.798	37.405	36.466	37.516	38.092	41.644	40.841	39.211	NaN	40.248
	37.614	39.653	40.992	39.278	40.505	41.624	39.189	40.405	42.855	40.581	35.072	39.455	35.682	38.744	33.619	37.362	37.707	41.423	41.012	37.881	32.446	38.852
	38.872	37.678	41.28	40.019	39.924	41.115	39.46	40.01	42.487	40.696	35.649	41.006	36.577	37.123	35.958	38.066	35.403	41.664	39.354	40.539	NaN	38.73
	37.91	38.718	41.928	37.632	40.746	41.378	40.903	40.631	42.582	40.208	36.319	40.719	37.849	36.637	36.608	37.639	36.22	41.08	41.232	40.489	33.713	39.477
	40.128	37.097	40.936	39.575	40.746	41.656	39.809	41.422	42.426	39.475	34.609	40.494	37.63	37.879	34.905	36.393	38.076	41.491	40.784	38.106	34.142	38.91
	40.631	39.435	41.544	41.689	40.922	42.188	39.323	39.625	43.042	39.82	38.097	40.282	37.306	38.187	36.293	37.459	36.847	40.803	41.075	39.67	NaN	39.575
	40.811	38.769	40.904	40.023	41.188	41.253	39.229	40.25	43.115	39.942	36.499	39.65	33.987	36.29	35.866	35.005	37.91	41.427	40.767	39.707	NaN	40.125
	40.933	38.754	40.149	40.877	39.999	41.813	38.736	41.233	42.144	40.032	36.467	39.899	34.346	38.473	38.292	38.269	36.761	41.273	41.05	37.299	NaN	38.931
	41.138	38.882	41.449	40.514	40.436	40.986	39.562	40.919	42.452	39.319	39.605	39.796	36.441	36.739	36.356	37.476	37.259	41.209	40.419	39.042	36.698	37.728
	39.274	37.063	41.379	40.708	40.381	42.383	40.402	41.88	42.167	41.174	37.735	40.847	33.927	37.377	34.077	37.852	34.4	41.378	40.834	40.282	NaN	38.872
	40.579	37.651	42.045	40.401	40.853	41.233	39.842	39.238	42.545	41.188	37.88	39.903	34.745	37.037	36.235	35.267	38.564	41.025	40.415	38.992	NaN	39.392
	39.267	37.676	41.323	37.641	41.033	41.542	39.611	41.332	42.29	40.282	36.886	40.639	36.494	37.791	NaN	38.489	37.928	41.125	40.725	40.165	NaN	39.342
	40.203	39.447	42.312	39.162	41.253	41.638	39.603	40.574	42.201	40.384	NaN	40.519	32.283	37.356	35.707	33.376	38.638	40.852	40.464	37.871	37.441	39.157
	39.207	39.626	41.902	40.123	40.023	42.092	40.336	40.984	42.465	39.766	35.618	39.557	36.657	37.14	38.24	37.252	37.685	41.135	41.109	39.646	31.513	39.658
	39.429	38.29	41.989	40.987	39.727	41.589	38.59	40.946	42.132	39.965	38.023	40.167	36.464	37.085	35.579	38.443	31.447	41.299	40.375	39.992	34.836	39.964
	41.386	38.343	41.8	39.338	40.3	42.224	40.847	39.468	41.692	39.879	38.932	41.226	32.666	36.777	38.239	37.321	39.456	41.083	40.944	40.681	32.901	40.322
	38.24	38.063	40.792	41.633	40.582	41.743	40.438	40.589	42.118	39.909	34.579	40.324	36.807	38.276	37.053	35.001	37.676	40.526	39.097	37.994	34.528	39.018
	38.511	38.169	40.52	38.879	39.74	41.738	40.35	40.466	42.176	39.844	31.517	41.645	36.812	38.162	38.066	35.658	38.494	41.348	40.607	39.908	NaN	33.823
	39.825	39.384	41.691	41.151	40.224	41.213	39.574	41.059	41.147	40.283	39.002	41.068	38.212	37.759	36.876	35.05	37.65	41.593	40.735	40.372	NaN	39.784
	41.053	38.299	42.522	39.716	40.587	41.816	40.349	40.636	42.303	39.623	36.966	40.357	36.079	36.987	37.15	35.934	37.344	41.099	40.722	39.64	NaN	39.851
	38.405	38.518	41.659	39.667	40.632	41.158	40.296	39.623	42.792	39.708	35.579	40.968	34.166	37.489	37.206	33.141	37.597	41.316	40.184	38.595	37.739	40.751
	39.48	38.914	41.768	40.409	40.516	41.32	40.338	39.552	42.406	39.45	38.607	39.981	34.742	37.866	35.246	36.749	37.318	41.222	40.504	39.969	32.37	38.631
	39.845	36.508	42.331	39.091	41.319	40.872	39.753	39.574	42.926	39.638	34.342	40.562	37.195	36.785	37.706	NaN	37.003	41.221	39.969	39.98	33.41	37.505
	37.567	39.185	41.8	40.819	40.222	41.712	39.627	40.593	42.428	38.632	37.584	40.123	36.021	37.368	36.519	36.524	36.93	41.526	40.921	40.099	33.386	37.948
	39.588	38.451	41.836	40.675	40.49	41.72	40.078	40.728	42.273	40.626	35.211	40.124	37.631	37.748	37.776	36.826	37.107	41.553	40.784	39.323	34.443	39.429
	40.653	38.977	41.209	40.87	40.837	41.315	40.681	41.012	42.891	39.29	34.612	39.745	36.783	38.29	35.431	36.781	37.784	40.892	40.183	38.34	NaN	36.691
	39.503	38.887	41.493	39.589	41.424	41.694	40.202	40.514	42.104	39.899	33.776	39.712	36.521	38.624	36.38	34.428	38.172	41.239	39.559	39.141	NaN	39.986
	40.141	39.422	41.879	39.408	40.326	40.86	39.535	40.013	42.873	41.253	34.708	39.982	33.985	37.45	36.173	32.75	36.758	41.014	39.98	39.82	NaN	39.167
	38.257	39.079	41.286	38.512	40.284	41.75	39.77	39.442	42.594	39.803	37.798	40.064	37.619	38	36.498	37.356	37.749	40.686	39.908	39.357	31.762	39.628
	39.41	37.607	41.716	40.345	40.977	41.946	38.691	40.658	41.124	39.995	37.372	40.102	38.127	37.385	37.89	38.454	38.949	41.422	38.584	36.385	36.209	39.447
	41.627	39.15	40.857	39.787	39.939	42.167	40.607	40.57	41.826	40.131	35.386	39.952	34.376	38.32	37.158	35.262	37.053	40.859	40.216	39.471	NaN	38.79
	38.583	37.446	41.321	39.023	40.795	41.345	39.312	39.629	NaN	41.148	37.334	40.648	37.424	37.29	32.633	38.329	36.802	41.409	40.057	40.279	NaN	39.592
	38.879	36.416	41.741	40.075	40.995	41.721	40.464	41.446	42.796	39.564	36.844	40.528	35.495	38.366	37.382	38.087	38.714	41.42	40.817	38.868	NaN	40.132
	40.547	37.706	42.205	39.168	41.253	41.85	39.85	41.038	42.45	40.399	37.617	40.157	34.196	37.634	35.935	36.998	38.198	40.908	41.285	40.937	NaN	39.849
	39.853	38.231	41.363	39.872	40.416	41.144	39.843	41.132	42.704	38.838	36.966	41.148	32.937	38.308	36.449	37.846	37.263	40.015	39.808	39.848	NaN	39.457
	40.688	39.789	40.4	38.826	40.945	41.873	39.93	41.134	42.432	40.535	37.017	40.166	36.435	37.647	36.828	35.827	38.441	41.142	40.203	40.79	NaN	38.972
	41.469	39.757	42.011	41.097	40.125	41.963	39.719	40.97	42.334	39.581	34.836	40.883	35.38	37.714	36.495	37.687	37.935	40.884	39.671	40.126	NaN	39.138
	40.663	37.578	41.63	41.41	40.777	41.81	39.721	39.996	41.561	40.635	37.04	40.348	36.506	36.178	36.878	37.86	38.308	41.057	41.168	40.316	NaN	39.895
	40.211	36.879	41.971	38.726	40.242	41.363	39.358	41.313	42.096	40.711	36.663	40.402	37.488	37.62	35.933	38.46	36.03	40.629	40.84	39.062	35.792	38.537
	37.881	39.593	42.125	40.14	40.322	41.119	40.05	40.772	42.164	39.44	35.508	40.637	35.112	38.027	36.033	37.421	36.362	39.596	40.807	40.003	NaN	39.239
	37.638	38.291	41.997	39.214	40.108	40.642	39.239	39.533	42.437	40.414	NaN	39.408	36.623	38.172	36.353	33.416	36.426	41.374	40.909	39.643	33.893	39.829
	37.771	39.87	41.24	40.289	40.537	41.637	40.256	41.027	41.646	40.282	37.018	40.045	37.315	37.613	31.178	36.891	38.628	41.203	40.884	38.415	33.533	38.799
	38.659	39.073	42.622	40.373	40.58	41.846	40.3	40.845	41.561	40.758	37.044	40.199	31.456	37.834	37.349	32.463	37.718	41.816	40.442	40.306	33.822	39.018
	39.68	38.3	41.585	38.179	39.873	41.66	39.281	39.231	41.571	40.078	35.356	40.658	35.079	37.324	35.68	37.266	38.357	41.187	40.33	38.789	35.909	39.73
	40.847	40.168	41.672	40.02	40.094	40.71	40.224	40.049	42.166	40.592	36.169	41.112	36.406	37.991	37.228	36.454	34.645	41.249	40.743	39.787	36.126	39.741
	36.415	36.734	41.944	39.489	40.706	41.321	40.319	40.919	43.059	40.163	37.837	39.848	33.161	36.812	35.688	NaN	38.227	41.322	40.207	39.987	34.083	38.93
	40.454	38.64	41.367	38.421	40.473	41.181	39.677	40.19	42.861	40.997	36.638	39.794	36.347	37.98	35.824	33.754	37.748	41.575	40.832	39.302	NaN	37.911
	39.342	38.941	41.85	40.176	40.639	41.54	39.893	41.03	42.526	39.475	34.376	40.829	33.057	38.043	37.521	37.081	38.203	41.657	40.979	39.382	NaN	40.057
	38.454	36.792	41.808	40.316	41.018	41.753	40.898	39.771	NaN	39.615	36.58	40.773	37.033	37.263	38.202	36.461	37.774	40.666	40.458	41.395	36.535	39.92
	39.645	38.519	42.094	39.506	40.343	41.218	40.15	39.026	42.986	40.971	33.115	40.413	34.383	38.194	35.371	36.727	37.18	41.909	41.436	40.296	NaN	38.221
	40.739	38.814	41.56	39.201	40.877	42.177	39.722	40.683	42.936	39.273	33.465	40.673	35.133	37.967	36.544	36.425	35.761	41.119	40.362	38.693	NaN	39.476
	40.627	40.125	42.103	40.46	41.176	42.209	39.513	40.347	42.512	40.683	36.349	40.531	NaN	38.007	37.844	33.527	38.972	40.134	40.166	39.144	34.82	38.957
	40.352	38.139	41.836	39.412	40.391	41.788	40.48	41.764	42.2	40.231	37.195	39.924	32.487	37.777	36.907	36.955	36.374	41.652	40.336	37.548	NaN	39.939
	38.541	38.273	41.449	38.453	38.82	41.73	39.463	39.841	42.58	41.178	36.64	39.666	36.374	37.569	30.32	35.823	37.213	41.286	40.258	39.347	34.447	37.666
	36.869	39.045	42.229	38.897	40.371	41.179	39.023	40.369	42.73	40.817	34.964	40.241	37.343	38.187	36.098	36.279	37.792	41.062	40.015	40.552	36.108	38.946
	39.602	35.712	41.209	40.866	41.284	41.571	39.832	40.957	42.327	40.267	37.028	39.838	36.092	37.833	36.082	35.081	36.824	41.559	40.719	38.195	34.321	39.629
	40.855	37.749	42.061	39.559	41.442	41.507	39.49	41.025	42.823	40.141	36.734	40.003	37.193	37.293	35.62	35.125	37.05	41.038	41.221	39.48	NaN	39.431
	40.235	39.219	41.233	39.318	41.263	41.555	40.278	40.039	41.837	39.17	35.91	39.825	36.58	37.678	34.706	38.647	38.099	41.441	39.997	39.485	NaN	39.71
	38.965	39.66	42.009	40.33	40.12	41.993	39.935	39.362	41.722	40.912	37.855	40.377	35.128	37.266	37.001	33.544	36.678	41.184	40.247	40.647	NaN	38.384
	38.622	38.369	42.588	40.941	40.278	41.093	40.034	40.782	41.615	39.976	36.243	39.83	32.088	38.244	36.4	37.174	38.983	41.359	40.79	40.261	NaN	39.027
	38.96	39.561	42.096	38.882	41.11	41.853	39.067	41.222	41.745	40.58	35.83	41.134	37.28	37.574	35.647	37.542	37.477	41.844	40.994	38.983	31.522	38.502
	40.71	36.71	41.269	40.404	39.848	41.724	39.432	39.84	42.048	40.837	34.69	40.98	37.129	36.881	36.67	37.856	37.113	40.995	41.179	39.177	NaN	39.009
	40.222	38.03	42.261	40.341	40.175	41.687	40.147	41.549	42.976	41.028	38.162	39.797	34.419	36.758	33.89	35.832	37.639	41.674	39.899	40.372	NaN	40.042
	40.403	38.596	41.763	40.875	40.518	41.569	40.182	41.032	42.74	40.023	34.016	40.656	34.29	38.106	32.518	36.973	34.43	41.503	39.125	36.822	36.941	40.28
	38.778	36.352	42.364	39.904	41.029	41.715	39.118	39.942	40.931	40.292	38.265	39.86	35.287	37.681	37.198	37.644	38.229	41.561	40.626	39.151	NaN	39.638
	41.496	40.098	40.393	40.021	40.773	42.118	40.508	40.92	42.477	41.089	36.715	40.561	33.344	37.33	37.408	38.129	35.409	40.465	39.859	40.191	33.925	38.158
	39.987	37.289	42.327	39.806	40.243	41.517	39.815	40.589	42.345	39.403	37.399	40.024	36.966	37.779	38.071	34.55	37.687	40.84	40.477	38.049	NaN	38.336
	39.328	36.67	41.508	40.62	40.835	41.216	40.139	41.159	42.407	40.639	36.921	39.645	35.609	38.12	36.145	35.022	38.39	41.425	40.3	40.376	34.815	39.872
	39.699	38.819	41.984	39.554	40.159	41.99	40.388	39.324	NaN	40.121	34.087	39.758	35.166	37.863	37.629	35.639	NaN	40.422	40.482	40.025	NaN	39.67
	39.954	38.276	39.689	39.504	41.281	41.414	39.574	40.542	42.197	38.556	37.693	41.115	38.815	37.151	36.478	36.893	37.359	40.563	40.379	39.172	32.134	39.997
	41.652	39.315	42.338	41.024	40.555	41.838	39.963	39.556	40.947	40.734	35.995	40.683	36.097	37.279	37.396	37.752	38.55	40.495	40.977	40.148	34.541	38.679
	39.95	37.901	40.964	40.597	40.023	40.859	39.273	39.284	42.689	39.73	37.398	40.709	36.604	35.562	36.892	37.079	38.411	41.062	40.198	37.42	34.201	39.23
	40.068	36.379	41.398	39.988	40.126	41.564	39.534	40.384	42.391	40.553	38.598	39.745	32.001	37.952	38.453	37.475	37.272	41.463	40.83	40.558	37.678	40.355
	41.638	37.961	42.227	40.478	39.965	41.108	39.728	40.75	41.897	40.423	35.183	40.565	34.016	37.505	37.55	36.891	37.824	41.36	40.819	38.94	NaN	39.085
	40.573	38.913	40.264	38.747	40.11	42.176	39.208	40.75	42.495	40.879	36.258	41.258	35.761	38.153	34.989	36.992	37.063	41.21	40.446	41.44	NaN	40.01
	40.306	38.06	40.996	41.067	40.532	41.968	39.186	39.989	42.301	40.83	38.128	40.495	31.474	37.928	37.432	38.069	37.451	40.702	40.635	39.922	NaN	39.558
	38.448	40.35	41.37	40.272	40.815	41.764	39.328	39.428	41.132	40.47	36.758	40.68	37.092	38.161	34.933	34.329	37.727	41.842	40.642	39.934	35.461	39.61
	40.99	36.762	40.166	38.833	40.631	41.272	39.866	39.742	42.412	40.333	38.259	40.117	36.609	36.224	35.029	37.931	34.417	41.976	40.902	40.022	34.785	37.722
	38.616	39.276	41.633	39.972	41.083	41.693	39.269	40.593	42.15	38.82	36.817	40.297	36.137	36.503	37.544	37.255	37.573	41.239	41.032	40.073	NaN	38.684
	41.427	38.499	41.319	39.22	40.145	41.45	40.049	40.111	42.426	40.164	33.554	39.184	NaN	37.988	NaN	35.174	38.893	40.914	39.286	40.162	33.194	39.751
	39.712	39.67	41.025	37.965	41.572	41.571	38.836	39.959	40.514	40.597	35.725	40.297	37.489	37.593	38.055	34.354	37.157	41.198	40.15	38.029	35.824	38.695
	40.182	39.6	42.443	40.798	39.279	40.65	40.221	40.008	NaN	41.102	36.07	40.558	36.947	37.235	38.435	35.663	38.53	41.501	40.495	40.293	NaN	39.871
	39.041	38.727	41.223	40.121	40.119	41.451	40.088	40.252	42.052	40.773	36.48	40.876	36.58	37.844	35.252	38.971	37.206	41.3	39.689	39.973	NaN	39.663
	41.361	39.707	42.566	39.784	40.651	41.574	40.162	40.961	42.186	39.607	36.584	40.709	34.417	38.172	37.452	36.651	37.578	42.027	39.997	37.528	NaN	39.266
	40.67	39.062	41.706	40.476	41.21	41.441	40.264	41.421	42.69	40.025	36.729	40.574	36.086	37.812	37.681	37.105	32.398	39.672	40.539	40.578	34.619	38.976
	39.879	39.19	41.556	39.308	41.291	41.302	40.895	40.316	42.39	39.452	33.481	40.337	35.546	37.523	36.065	34.249	38.61	41.772	40.688	40.403	NaN	40.113
	40.918	38.612	42.003	40.786	41.344	42.338	40.543	39.964	41.735	40.256	34.768	40.83	37.617	37.117	37.16	36.614	39.204	40.933	40.799	39.034	NaN	38.574
	41.219	39.273	40.663	40.204	39.796	41.403	39.715	39.974	41.697	39.377	33.511	40.814	35.929	37.007	37.698	36.869	33.617	41.374	40.714	36.353	NaN	40.515
	35.984	39.401	40.753	39.652	40.153	41.771	39.55	38.654	42.579	39.496	32.513	41.576	32.172	38.093	37.716	38.391	37.441	41.3	41.132	38.829	NaN	40.443
	39.598	39.358	41.857	39.794	40.553	41.653	40.125	38.93	42.727	40.831	36.121	40.421	35.07	37.558	34.998	33.904	38.103	40.654	41.012	39.947	36.711	38.642
	40.465	39.069	41.731	39.835	40.895	41.507	39.719	41.562	42.706	39.64	36.885	39.773	37.548	38.064	37.772	38.291	38.375	41.038	40.232	39.288	32.369	40.53
	41.559	39.337	41.454	40.58	41.11	41.568	39.854	41.785	42.812	40.453	37.233	40.716	34.907	38.347	34.912	37.044	33.571	41.018	41.527	39.978	NaN	39.784
	37.974	38.814	42.429	40.377	41.077	41.561	38.101	40.131	43.066	40.404	37.182	40.322	35.433	36.457	35.182	36.158	37.916	41.361	40.284	40.037	36.308	38.405
	40.178	39.993	42.184	39.589	38.908	40.939	40.278	39.356	42.328	40.747	36.84	40.01	36.194	36.528	35.836	36.011	38.496	41.28	39.197	37.541	35.499	39.671
	38.78	36.659	41.189	40.014	40.39	41.831	39.683	39.358	42.525	40.469	35.929	40.016	37.578	37.055	35.802	34.92	39.079	40.633	40.049	39.897	NaN	39.421
	40.925	39.094	41.247	40.618	40.668	42.158	40.148	40.984	42.116	40.245	34.693	40.147	34.058	36.758	36.009	35.479	39.391	41.407	40.85	38.601	35.806	39.219
	40.724	38.321	41.963	40.282	40.594	41.943	39.93	38.837	NaN	40.741	33.984	39.884	36.904	36.728	35.536	37.179	37.816	40.927	40.238	40.507	NaN	39.833
	40.455	37.943	41.278	40.637	41.084	41.606	38.376	39.41	39.83	39.887	34.582	41.08	37.691	36.56	37.11	37.98	35.982	41.522	40.54	41.067	NaN	38.362
	39.846	39.678	41.678	38.906	39.768	41.231	39.404	39.827	42.974	40.486	36.785	40.345	34.421	37.145	35.53	36.135	37.715	40.857	40.496	38.857	NaN	37.811
	40.504	37.542	41.324	38.285	40.456	41.436	38.84	40.535	42.354	39.972	34.231	40.155	36.813	36.928	37.915	38.275	33.368	40.47	40.56	39.685	NaN	37.923
	38.769	38.169	42.161	41.088	39.746	41.105	40.011	41.084	41.876	40.574	38.125	39.946	37.113	38.066	37.598	37.013	38.947	41.075	41.008	37.834	NaN	40.273
	40.479	39.793	41.573	39.443	39.691	41.876	40.119	40.023	42.257	40.793	37.272	40.146	34.752	37.762	33.555	36.653	37.779	40.905	40.305	NaN	NaN	40.027
	39.599	38.296	41.99	39.91	38.354	41.935	38.535	38.416	42.027	41.511	35.257	40.884	35.94	37.884	33.41	37.728	37.167	41.02	40.486	39.639	NaN	38.359
	40.595	38.324	41.057	40.561	40.459	41.967	39.36	39.526	42.004	40.286	33.282	41.364	37.195	38.431	35.141	36.909	37.718	40.622	41.61	40.241	NaN	39.369
	39.847	38.535	41.433	40.514	40.317	41.45	40.317	40.902	41.592	40.274	37.798	39.73	38.59	37.493	35.162	37.955	38.54	41.152	40.497	35.64	NaN	39.941
	39.18	38.032	41.917	39.109	39.511	41.5	39.666	41.333	41.99	40.339	34.977	40.27	35.605	37.884	31.792	35.155	36.827	41.519	40.824	40.008	34.743	39.508
	40.673	39.574	42.181	39.785	41.37	42.09	39.467	40.744	42.126	40.985	35.952	40.333	35.939	36.99	36.537	35.628	37.307	41.61	40.458	38.87	NaN	40.002
	39.799	39.292	42.032	37.589	40.459	41.079	40.554	40.087	42.761	40.426	37.591	39.637	34.268	36.154	38.906	35.514	38.561	41.096	41.099	40.755	NaN	39.547
	39.976	38.229	41.768	38.93	40.95	41.617	39.573	40.613	42.624	39.402	37.023	39.892	32.54	36.723	35.145	36.04	34.236	41.618	40.648	41.138	NaN	39.566
	40.716	37.991	40.471	40.447	39.736	41.156	40.27	39.841	41.893	40.203	32.1	41.278	37.355	38.181	35.891	34.536	36.368	41.788	40.347	39.597	35.532	40.001
	39.805	38.827	41.886	39.412	41.535	41.292	39.838	40.201	42.439	40.407	37.671	40.752	36.426	36.193	36.615	33.294	34.353	41.58	40.29	39.519	34.147	40.071
	36.841	36.994	41.87	40.306	41.358	41.446	39.519	41.395	42.594	40.837	34.648	40.72	36.119	36.756	36.155	35.018	36.424	40.997	40.005	38.748	NaN	40.137
	39.259	38.817	42.363	38.628	40.867	41.78	39.576	40.252	NaN	40.535	33.745	39.311	NaN	38.035	36.546	30.959	37.274	40.531	40.491	39.593	NaN	39.688
	38.67	39.071	42.088	40.795	41.144	41.75	39.243	41.161	42.609	40.529	35.291	40.125	37.738	38.478	36.649	34.898	36.24	41.875	40.439	37.763	NaN	39.283
	40.529	39.531	40.615	39.4	40.812	42.111	39.031	40.81	42.674	39.514	37.598	39.849	33.574	37.42	36.877	34.998	37.26	41.218	39.997	39.538	NaN	39.553
	40.024	37.81	41.98	40.234	40.78	41.266	40.778	40.405	42.055	39.927	36.301	38.907	35.446	36.29	37.881	35.087	35.4	41.828	40.654	40.148	32.487	40.172
	38.336	38.309	41.346	39.419	40.617	41.65	39.613	40.649	NaN	38.718	37.517	41.055	31.665	38.418	36.238	37.208	37.495	41.518	40.362	39.66	NaN	37.82
	40.553	39.511	40.888	39.609	40.171	41.45	39.801	40.012	42.908	40.033	NaN	39.187	37.622	38.207	35.77	35.955	36.51	40.648	40.05	40.448	NaN	39.543
	38.351	39.498	41.055	38.644	41.195	41.907	40.255	39.625	42.266	40.28	31.92	40.321	36.613	37.377	35.901	35.48	36.136	41.226	40.226	39.655	NaN	39.874
	39.099	39.76	42.163	39.969	39.962	41.414	39.936	40.042	42.927	40.229	35.761	39.674	35.166	37.533	34.565	35.89	38.161	40.383	40.783	40.501	35.728	39.671
	39.571	37.026	41.294	39.919	40.078	41.831	39.907	39.481	42.063	39.105	35.031	39.97	35.405	36.381	36.199	37.81	39.16	40.275	40.554	38.932	33.976	38.278
	39.522	36.802	40.868	40.518	40.332	41.809	40.133	41.606	42.369	40.155	36.932	41.123	37.643	36.957	38.147	38.478	35.356	41.781	40.623	38.87	32.245	40.228
	39.257	39.023	41.432	39.852	41.035	41.667	40.992	40.179	42.313	39.769	36.525	40.245	37.372	36.759	35.033	33.249	38.448	41.057	40.568	39.803	NaN	39.48
	38.317	38.702	41.83	39.681	40.764	41.826	40.222	40.599	41.247	40.32	35.959	40.249	36.45	37.165	33.764	33.821	38.984	40.889	40.952	39.546	NaN	39.093
	39.366	36.901	42.122	40.145	41.02	42.127	39.814	39.469	42.34	40.472	37.614	39.8	33.195	37.795	36.191	37.086	37.311	40.426	40.728	38.179	36.192	39.252
	39.679	38.061	40.76	40.478	40.804	40.971	39.924	39.64	NaN	39.933	37.422	40.228	32.165	38.042	38.602	36.779	36.283	41.432	40.392	39.281	34.295	39.989
	40.243	38.214	40.451	40.125	40.658	42.289	39.487	40.269	41.684	39.814	37.628	41.279	36.603	37.28	36.221	35.343	39.65	40.543	40.357	40.962	NaN	38.652
	40.366	39.542	42.351	41.102	40.533	40.802	38.267	40.995	42.735	39.171	37.998	40.932	36.02	37.28	34.338	37.064	38.105	39.949	40.498	40.189	NaN	39.725
	40.75	38.376	42.241	40.132	40.355	42.022	40.467	41.443	42.826	40.608	35.945	40.079	37.943	37.464	37.145	34.625	38.813	40.804	39.925	39.734	NaN	39.889
	39.327	36.382	42.283	40.81	40.004	41.346	39.704	39.817	42.145	40.622	34.204	41.292	36.378	36.635	36.633	38.29	37.945	41.662	40.918	39.421	NaN	39.807
	40.842	38.881	41.38	40.603	40.691	40.797	40.288	39.823	43.169	40.039	37.488	40.339	33.608	36.288	35.249	35.209	38.706	41.615	40.843	40.349	NaN	39.444
	39.354	38.452	41.827	38.659	40.096	41.411	40.56	40.536	42.638	38.995	37.734	40.194	31.518	38.094	34.223	37.755	35.068	41.085	41.062	39.585	NaN	39.03
	38.615	37.992	40.987	39.183	40.686	41.639	39.822	38.622	42.674	40.713	38.523	39.283	35.481	38.281	NaN	35.624	38.544	41.517	40.892	39.933	NaN	39.436
	39.85	37.047	41.737	39.325	39.901	40.926	40.197	40.256	42.88	40.212	38.198	40.954	32.737	36.733	37.331	32.244	36.547	40.741	40.714	39.557	NaN	38.947
	38.3	39.691	42.427	39.23	41.292	41.262	40.142	40.453	42.796	40.788	37.989	40.816	35.638	35.519	32.188	38.069	37.572	40.22	39.873	35.643	36.401	39.99
	40.477	39.606	41.713	40.823	41.311	41.577	40.608	41.041	NaN	40.52	35.896	39.442	34.639	37.398	34.448	36.972	38.475	41.4	40.27	38.574	NaN	39.612
	39.244	39.681	42.204	41.121	40.095	42.054	39.874	40.333	43.133	40.602	34.21	41.106	NaN	38.025	37.209	37.166	34.331	41.071	40.481	39.586	NaN	38.582
	39.902	38.783	41.644	39.827	41.109	40.899	39.6	40.387	42.317	39.418	38.339	40.398	34.681	36.768	36.375	37.395	36.8	41.081	39.96	39.718	NaN	40.103
	41.303	38.69	41.685	40.511	39.651	42.415	39.235	39.908	NaN	39.262	38.035	40.433	36.069	38.375	38.167	37.533	36.633	40.897	40.326	37.843	35.615	38.395
	39.402	38.447	41.764	40.061	40.43	41.642	39.179	40.678	43.048	40.407	NaN	40.319	37.708	38.237	35.346	37.837	37.571	39.845	41.204	39.532	33.1	40.061
	41.066	37.523	40.861	39.128	41.46	41.382	39.128	41.285	43.094	39.861	33.049	40.601	35.974	36.987	37.863	34.671	37.221	41.148	39.956	38.805	NaN	37.801
	39.405	38.769	42.188	40.088	40.496	41.467	39.096	40.412	42.484	40.957	34.747	40.567	33.822	37.854	34.669	38.019	38.331	40.105	41.003	39.191	NaN	39.005
	39.856	37.49	41.653	39.498	40.528	41.513	40.501	41.368	43.057	39.546	34.647	39.686	33.424	38.061	37.152	37.513	38.438	39.947	40.768	38.938	31.84	39.117
	41.228	39.527	41.88	39.825	40.446	41.787	39.413	39.122	42.429	39.497	39.294	39.782	34.782	37.607	37.084	33.137	34.733	41.585	40.004	39.289	34.492	37.457
	40.114	35.974	42.379	38.596	41.16	41.439	40.204	40.56	42.493	39.979	34.859	41.013	37.262	38.528	37.799	32.702	36.264	40.278	41.167	40.281	NaN	39.061
	41.569	37.926	40.896	40.423	39.801	42.274	40.733	40.298	NaN	41.507	NaN	40.674	36.803	36.335	38.681	36.107	36.21	41.05	39.74	40.745	NaN	37.201
	40.996	38.989	41.751	39.776	40.204	41.325	39.487	40.789	42.666	39.601	35.144	40.128	37.322	37.256	36.946	38.81	36.354	41.299	39.463	40.567	NaN	37.591
	39.99	38.446	41.216	40.416	40.758	42.313	39.719	40.888	42.481	40.618	39.182	39.712	37.957	36.792	37.794	37.882	37.03	40.94	40.531	38.485	36.086	38.496
	39.993	37.776	41.894	41.307	39.779	40.833	39.134	39.456	NaN	40.987	36.425	39.592	33.932	37.406	35.392	36.291	37.352	41.18	40.376	39.313	NaN	39.353
	39.522	38.886	41.706	41.164	41.167	41.526	39.152	39.967	42.715	40.945	36.356	40.172	36.086	37.281	33.879	36.545	36.578	40.566	40.599	38.977	36.429	40.798
	36.877	39.32	41.779	40.34	40.413	41.648	40.48	39.97	42.21	39.936	NaN	40.93	35.335	37.905	37.149	37.548	37.931	41.709	40.342	40.005	NaN	40.004
	40.98	38.1	42.088	40.156	40.014	40.665	39.598	41.166	42.563	39.757	34.59	39.563	36.784	38.471	36.015	36.437	35.829	41.612	39.787	40.335	33.312	39.038
	40.609	38.316	41.347	40.198	40.737	41.647	39.552	41.482	42.308	40.735	36.873	39.817	NaN	37.858	33.928	38.086	35.149	41.38	40.304	40.323	NaN	40.148
	40.515	40.126	42.26	39.563	40.638	42.047	39.518	39.739	42.254	40.385	37.982	39.738	34.545	37.74	36.524	33.356	36.848	41.275	40.448	40.188	NaN	39.647
	41.071	38.926	40.898	40.444	40.386	42.045	39.187	40.289	42.548	40.258	36.463	40.662	34.288	37.181	35.465	35.781	37.714	42.002	40.807	39.767	NaN	39.265
	40.318	39.269	41.833	41.295	40.584	41.551	39.158	39.371	42.445	40.493	35.587	40.326	32.213	37.569	37.377	34.3	37.244	41.404	40.912	39.731	35.171	38.921
	41.154	38.865	42.297	39.202	40.12	41.906	39.651	41.313	42.827	40.202	37.109	38.861	34.185	36.614	36.322	37.515	37.39	41.145	40.361	39.751	34.729	36.868
	40.167	37.611	41.609	40.44	41.043	41.057	39.771	40.24	42.874	41.164	37.696	39.498	33.061	38.342	34.16	34.279	35.13	41.652	41.359	39.218	36.646	37.518
	40.066	38.926	41.591	40.979	39.038	41.515	40.644	40.702	41.991	40.049	35.107	40.414	36.075	37.997	35.355	34.949	35.565	41.504	40.773	40.08	34.82	38.813
	40.563	38.56	41.692	41.26	40.988	42.137	39.669	41.207	42.749	40.219	34.874	40.181	36.953	37.026	36.525	35.918	34.144	40.886	39.657	40.087	34.466	38.614
	40.115	36.729	41.003	40.065	39.629	41.166	39.288	41.088	42.775	41.05	36.742	40.236	36.418	36.893	33.768	34.592	39.109	40.574	40.966	38.535	NaN	38.778
	39.406	40.335	40.465	40.979	39.745	41.302	39.536	40.723	42.947	39.826	38.599	39.782	35.6	38.242	36.929	34.894	37.156	41.502	40.386	38.775	NaN	39.334
	39.768	39.078	41.127	38.92	40.361	41.108	39.664	39.991	42.49	39.998	36.329	40.201	34.246	37.717	31.866	36.577	37.864	42.031	40.388	40.923	33.915	38.471
	40.897	39.365	41.391	39.829	40.567	42.278	39.996	40.053	42.153	40.705	33.639	40.341	34.042	38.521	38.176	35.752	37.379	41.415	40.307	39.997	NaN	39.095
	38.623	37.422	42.236	40.578	40.29	41.082	39.17	40.031	42.783	40.915	35.496	40.115	33.676	38.422	37.625	34.12	37.736	40.841	39.614	38.766	NaN	39.906
	40.454	37.617	42.223	41.087	40.451	41.576	39.983	40.127	42.804	40.388	36.618	40.204	32.803	37.626	37.692	36.196	36.637	41.23	40.63	40.655	37.354	38.193
	40.662	39.353	41.856	39.249	40.561	41.344	40.401	40.882	42.536	40.693	36.347	40.511	36.261	38.003	37.129	35.672	39.094	40.906	40.418	40.252	NaN	37.854
	39.743	39.528	42.319	40.292	40.698	41.809	38.518	40.623	42.693	40.465	36.858	40.021	36.198	37.5	33.814	37.737	36.996	40.943	39.257	39.996	NaN	37.436
	39.047	39.306	41.815	40.85	40.961	42.053	40.102	40.949	NaN	40.886	35.781	40.685	35.54	37.097	37.678	36.9	35.86	40.886	40.117	39.95	NaN	38.961
	38.932	38.532	41.448	41.027	40.425	42.111	38.948	41.181	41.739	39.921	36.171	39.652	32.905	37.97	35.901	35.829	36.985	40.609	39.959	40.008	NaN	38.724
	40.759	38.096	40.839	41.341	41.206	41.514	39.959	40.476	42.576	41.401	36.58	38.913	35.125	38.17	35.261	37.148	37.709	40.732	40.12	39.625	NaN	37.542
	38.804	38.479	41.956	39.96	40.498	41.867	40.429	41.374	42.649	40.501	35.895	40.508	32.049	38.061	36.132	37.922	36.591	40.254	40.8	39.277	NaN	37.424
	39.218	37.826	41.869	38.845	40.746	42.11	39.667	41.499	41.339	39.871	38.501	39.682	34.49	35.798	37.304	35.264	37.576	40.719	39.539	39.348	NaN	39.27
	41.227	37.864	41.763	39.7	40.05	41.777	39.827	39.416	42.467	39.605	36.851	40.237	NaN	37.637	36.617	37.47	35.869	41.098	40.6	39.334	33.294	39.527
	41.41	39.43	42.078	38.009	41.224	42.028	40.176	40.231	42.826	40.819	36.71	39.935	31.559	37.857	32.076	36.535	37.727	41.143	40.996	39.515	37.241	38.639
	37.199	37.751	41.652	40.72	40.138	42.023	40.23	39.748	42.667	40.017	33.48	39.788	35.406	38.017	36.677	34.563	39.314	41.209	40.332	40.697	31.981	39.091
	40.571	38.059	41.35	39.849	39.612	40.859	40.452	41.037	41.821	40.096	34.797	39.742	35.553	37.643	35.918	32.52	38.1	40.208	40.575	38.951	NaN	39.506
	36.836	39.811	41.998	40.464	41.242	41.275	40.485	39.446	42.554	40.881	36.587	40.429	37.051	38.873	37.775	37.651	36.509	40.954	40.116	38.901	NaN	36.711
	37.911	37.937	42.468	40.572	40.947	42.025	40.061	39.056	42.822	40.548	32.296	40.613	37.12	37.711	36.15	37.439	37.326	40.097	40.179	39.805	NaN	39.973
	40.555	38.839	42.233	39.851	40.739	42.169	39.257	38.779	41.416	39.867	33.222	40.483	37.44	37.488	37.659	36.505	34.446	41.357	40.636	38.283	NaN	39.777
	38.654	39.271	41.763	40.737	39.89	41.169	40.378	38.936	42.209	40.407	35.914	39.955	33.852	38.004	37.594	37.038	37.865	40.341	39.849	40.132	NaN	38.308
	39.827	36.414	41.26	39.908	39.944	41.106	39.804	40.324	42.18	40.383	38.793	40.891	37.689	38.061	36.947	37.182	36.735	41.12	41.094	40.067	35.836	38.052
	40.348	37.722	40.938	37.956	39.657	40.496	39.719	40.468	42.536	40.761	36.949	39.37	35.985	37.718	37.661	31.824	38.573	41.149	40.254	36.739	NaN	39.975
	40.972	39.223	41.841	40.862	40.722	41.436	39.003	38.748	42.521	39.538	37.523	39.536	36.926	37.415	35.46	34.536	35.544	41.303	41.157	38.986	NaN	39.394
	38.462	37.002	41.525	38.269	40.456	41.565	38.888	39.891	42.317	39.916	36.216	40.276	34.263	35.887	38.128	32.722	37.99	40.142	40.567	39.989	NaN	38.659
	38.595	39.576	42.127	39.789	40.128	41.662	40.019	40.036	43.039	40.287	38.152	40.056	33.611	37.195	36.782	38.055	33.914	40.737	40.898	40.764	NaN	38.569
	38.958	37.65	41.791	40.251	41.437	41.448	39.961	39.823	42.448	40.226	35.326	40.77	36.67	36.969	38.723	36.736	37.855	39.707	39.845	39.797	NaN	39.133
	40.87	39.044	41.05	40.977	40.495	41.182	39.554	41.295	42.666	39.693	36.483	39.351	33.342	37.855	34.673	37.982	38.821	41.137	40.358	39.301	NaN	38.015
	40.348	40.016	41.155	39.559	41.523	41.716	38.844	39.924	42.362	40.161	33.951	41.155	37.366	37.608	37.313	36.358	37.124	40.692	40.783	40.247	NaN	39.952
	40.603	39.103	41.25	40.704	41.593	41.106	39.353	40.788	NaN	40.027	36.624	41.08	36.975	37.823	36.581	37.099	38.852	40.947	40.085	38.469	37.18	39.849
	40.192	36.482	40.38	40.115	40.948	41.654	39.177	39.716	42.086	40.46	38.436	40.805	NaN	37.593	36.008	38.109	34.521	41.457	39.637	39.652	NaN	38.555
	39.94	38.172	41.663	40.579	40.416	42.04	40.338	41.352	41.927	40.313	37.097	40.72	36.906	36.986	38.255	35.676	38.303	41.238	41.012	40.328	35.642	37.304
	40.207	37.084	41.385	41.199	39.551	41.764	40.17	39.784	42.003	40.328	33.089	39.923	NaN	37.918	34.162	37.833	35.72	40.905	40.581	40.192	35.417	39.281
	39.782	39.5	42.27	41.472	39.201	41.819	40.884	40.132	42.279	40.312	36.558	40.289	37.041	36.799	32.664	38.75	38.944	40.538	41.107	39.508	31.526	38.864
	39.299	39.295	41.287	40.566	40.794	41.475	39.815	39.982	42.073	40.475	35.549	40.535	35.535	38.125	35.905	37.481	35.854	40.759	41.021	35.684	NaN	40.571
	39.338	39.093	41.734	40.681	40.76	42.131	39.982	38.864	42.499	40.145	36.423	40.861	37.391	37.321	34.56	38.66	38.815	41.405	40.901	39.775	NaN	39.815
	38.035	38.939	41.285	39.798	39.806	41.263	39.618	40.177	42.754	40.262	34.758	40.486	33.54	37.646	34.821	38.686	36.955	41.198	41.289	40.926	NaN	39.923
	40.603	39.844	42.152	40.343	41.047	41.885	40.057	38.358	42.364	40.461	34.747	41.082	34.823	37.991	38.013	38.744	38.788	40.773	40.617	40.305	32.179	39.074
	40.113	39.211	41.125	40.515	40.671	41.837	39.542	39.379	41.434	40.514	37.064	40.376	34.576	37.805	35.721	37.872	38.114	41.728	40.279	41.069	37.104	39.213
	37.731	38.532	42.257	39.663	40.16	41.844	39.996	40.601	42.565	40.913	38.784	39.797	33.828	37.179	37.009	36.737	39.271	41.654	40.678	40.357	NaN	39.602
	39.379	38.894	41.74	38.507	41.263	41.245	38.891	40.95	42.374	41.1	37.14	40.067	37.597	37.048	31.105	35.122	36.411	41.258	39.979	37.707	33.748	38.626
	40.675	38.233	41.91	40.269	40.482	41.772	39.5	40.308	42.776	39.505	36.85	40.139	36.024	37.811	37.404	36.998	33.977	41.187	40.699	39.564	NaN	40.277
	40.389	39.016	41.918	39.673	40.971	41.74	39.9	40.62	42.589	40.295	37.167	40.814	33.108	37.291	37.247	37.097	35.133	39.77	39.782	41.025	NaN	39.875
	39.075	39.521	41.757	39.157	40.863	41.645	39.741	41.013	41.968	41.342	36.144	40.183	34.433	36.99	34.858	37.276	36.157	41.108	40.213	38.778	NaN	39.567
	39.078	37.458	41.551	39.612	40.481	42.099	40.598	40.715	41.718	40.953	35.956	39.956	35.222	37.279	35.609	38.892	37.671	41.122	41.107	38.267	34.023	39.084
	40.063	36.636	40.832	40.576	40.595	40.997	39.518	40.604	42.492	40.693	35.757	39.853	36.099	37.742	37.943	33.797	38.886	40.775	40.561	40.718	NaN	36.826
	38.478	36.776	41.404	40.124	39.527	41.016	39.875	40.876	42.557	41.022	37.834	40.353	32.839	38.14	37.369	35.096	34.614	40.545	40.923	39.211	NaN	39.718
	38.551	37.158	42.058	37.993	41.203	41.181	40.023	39.116	42.521	39.748	38.596	40.7	31.416	37.107	35.353	35.36	36.855	39.545	40.528	39.11	NaN	39.066
	40.113	38.448	41.929	37.759	40.771	41.027	40.257	40.002	42.76	40.467	36.384	39.635	33.763	37.877	37.265	35.83	37.81	40.726	40.753	41.04	34.799	37.364
	40.071	38.907	41.757	38.663	40.31	42.202	39.058	40.941	42.279	41.597	37.389	40.097	37.49	37.241	35.097	37.936	38.725	41.307	40.571	40.739	NaN	39.425
	40.977	37.731	40.443	40.344	41.285	41.552	38.981	41.203	42.65	39.834	36.517	39.832	37.687	37.697	37.107	35.431	37.984	40.973	40.77	38.332	32.846	39.146
	39.142	38.162	41.338	40.594	41.213	41.634	39.739	40.752	41.416	39.298	36.264	40.85	33.879	37.153	36.564	36.746	NaN	41.083	40.124	39.753	NaN	39.268
	40.836	38.992	41.795	40.357	40.564	41.817	40.146	40.364	42.51	40.243	35.959	40.689	36.241	37.051	37.965	34.584	35.938	40.144	40.656	39.396	37.173	38.411
	40.694	39.659	41.186	40.183	40.883	41.708	39.036	38.579	42.417	40.087	35.104	40.182	NaN	37.484	36.541	37.392	37.041	40.183	40.935	38.83	36.816	40.257
	38.901	38.894	42.142	41.064	40.749	41.693	39.895	40.318	NaN	40.528	38.218	39.972	37.448	37.568	36.053	37.231	36.648	40.911	40.239	40.004	36.559	38.781
	39.139	38.634	41.935	40.91	39.553	41.737	39.807	40.26	42.04	40.82	37.303	39.291	38.368	37.101	34.761	37.758	38.943	42.007	40.586	39.457	NaN	39.417
	41.475	39.51	41.368	40.571	41.055	42.062	40.228	40.482	NaN	40.906	37.688	40.11	37.704	37.239	37.749	34.618	37.698	41.746	40.745	40.413	NaN	39.946
	40.286	39.785	40.91	38.748	40.75	41.163	40.283	40.827	42.676	40.129	NaN	40.821	37.485	38.056	31.636	37.945	35.075	40.819	40.593	38.022	NaN	40.521
	39.504	39.257	41.104	40.291	40.489	41.679	40.49	39.813	42.412	40.629	34.741	40.646	37.829	36.906	35.412	37.804	34.277	40.957	40.901	40.747	NaN	39.436
	40.339	39.034	41.888	39.737	40.327	41.925	40.549	41.042	42.672	40.603	33.758	40.46	37.503	35.432	35.148	34.368	37.394	41.106	39.979	40.19	34.568	38.594
	39.186	36.156	42.577	39.488	41.347	42.127	40.144	39.451	42.923	41.17	NaN	40.81	37.889	37.229	38.192	38.102	37.76	41.577	40.081	39.778	NaN	38.975
	40.045	39.825	42.338	39.897	40.012	40.627	39.417	40.899	42.092	40.353	37.614	40.348	35.705	37.33	38.088	36.657	38.694	41.274	40.383	40.667	NaN	39.241
	39.824	39.372	41.009	38.84	40.433	41.282	40.404	39.972	NaN	40.088	36.115	39.979	31.273	37.291	36.685	37.726	38.43	41.425	40.103	37.68	NaN	40.04
	39.295	39.031	41.914	40.465	40.906	41.264	38.231	39.814	42.194	40.34	37.515	40.485	35.908	37.279	37.953	36.23	35.934	40.57	40.441	38.944	34.669	37.998
	40.998	37.049	41.633	39.061	40.848	42.011	39.46	38.58	42.609	40.703	37.117	41.054	37.052	36.429	34.473	35.294	39.334	41.78	40.525	40.071	NaN	39.623
	37.285	37.684	41.496	40.802	40.882	41.986	39.649	40.243	42.844	40.196	36.991	40.779	35.488	36.872	35.978	37.668	39.235	41.65	40.748	39.314	NaN	39.694
	39.595	38.367	41.269	38.667	39.964	41.825	39.91	40.24	42.263	40.025	34.246	40.608	35.424	36.877	36.411	37.768	37.968	40.333	40.429	39.461	NaN	39.284
	39.488	39.468	41.033	38.325	40.808	40.769	40.146	41.005	42.657	40.1	35.192	40.188	33.651	37.988	36.615	36.431	36.21	41.252	40.563	39.481	NaN	39.278
	40.154	38.119	41.853	41.476	40.642	41.79	40.291	40.767	42.581	40.522	36.109	40.885	34.409	37.685	36.445	37.689	37.613	41.166	40.143	38.768	35.217	37.721
	40.071	40.208	42.341	40.165	41.123	41.358	39.928	40.676	42.549	39.154	36.225	40.293	34.803	38.005	35.075	35.813	37.982	40.699	40.814	39.522	32.852	39.883
	41.071	38.464	42.03	37.347	40.378	41.158	38.711	40.229	42.24	39.348	34.688	40.141	35.209	36.82	37.194	34.673	34.559	41.024	39.468	40.861	35.83	38.586
	40.176	39.059	41.652	38.539	41.377	41.782	38.959	41.437	42.209	40.31	35.304	41.043	36.545	37.12	35.585	32.443	37.894	40.845	39.927	38.33	NaN	39.374
	40.039	37.99	42.013	40.933	40.764	41.591	39.593	39.687	42.342	41.215	37.331	41.68	35.18	37.556	37.629	36.132	38.357	41.389	39.797	40.755	NaN	38.468
	38.78	36.857	42.505	38.386	40.249	40.885	39.221	40.869	42.784	40.37	NaN	40.763	37.703	37.6	36.489	33.398	36.527	40.773	40.063	40.753	NaN	38.633
	41.081	38.753	42.011	40.123	41.153	41.743	39.041	41.117	41.94	38.942	36.184	40.403	36.797	36.982	37.289	37.014	38.405	41.845	40.806	39.962	NaN	39.292
	37.805	38.235	41.855	40.52	40.388	42.032	39.062	40.152	NaN	39.819	36.32	40.412	35.499	36.843	33.089	37.853	36.913	42.326	40.062	40.616	34.964	37.993
	39.255	38.74	41.948	40.328	39.831	41.449	38.563	40.574	42.483	41.107	36.938	40.268	36.816	36.607	37.426	37.912	37.33	40.514	39.947	39.518	NaN	39.42
	39.049	38.977	42.016	40.775	40.7	41.462	40.116	41.084	42.198	39.944	38.35	39.742	35.688	36.562	38.736	36.372	33.017	41.554	40.858	35.184	NaN	39.186
	41.172	38.102	41.225	39.244	41.518	41.289	39.035	38.883	42.327	40.263	33.82	39.958	34.03	38.291	35.185	37.282	34.339	41.45	40.728	40.263	NaN	40.513
	35.713	39.475	41.208	39.217	40.202	41.477	39.887	40.73	41.279	40.191	36.585	40.989	NaN	37.492	36.138	36.009	37.945	41.208	40.157	38.769	36.226	39.107
	41.149	38.993	42.108	40.264	40.413	40.91	39.486	40.848	42.937	39.56	36.442	40.742	36.509	38.403	38.528	36.971	37.908	40.788	40.529	39.993	NaN	39.957
	40.581	39.082	41.801	38.871	40.249	40.738	39.926	40.407	42.289	39.291	36.608	39.347	34.599	36.924	36.384	37.464	36.626	40.96	40.304	40.049	NaN	37.708
	38.524	38.759	41.38	40.216	40.783	41.75	40.392	39.993	40.987	39.663	37.016	40.449	36.804	37.185	34.202	38.265	36.438	40.935	40.533	40.561	NaN	38.092
	40.305	39.634	41.205	40.705	40.159	42.001	39.378	40.804	41.583	40.441	35.957	40.373	36.544	37.359	35.847	37.27	37.002	41.456	40.068	40.387	35.957	39.691
	39.74	39.255	39.605	40.487	41.129	41.638	40.173	40.886	42.516	40.559	35.679	40.381	32.172	38.232	36.953	38.519	35.135	40.951	39.731	40.003	NaN	38.21
	39.764	39.347	41.663	37.665	40.547	42.05	39.349	39.784	42.445	40.205	38.421	40.015	37.652	38.032	37.81	38.393	38.285	41.016	40.02	40.282	33.837	39.48
	40.082	39.408	41.296	40.688	39.912	41.715	39.423	40.857	42.028	39.948	35.297	40.368	37.408	36.443	36.447	36.415	38.309	39.759	40.219	39.046	NaN	38.874
	39.182	38.975	42.013	40.331	39.388	41.286	40.479	39.697	42.571	39.583	36.425	40.064	35.187	37.071	37.134	37.562	32.249	40.838	41.098	38.5	NaN	40.235
	37.924	37.591	41.912	41.139	40.585	41.834	39.942	40.426	NaN	40.635	32.785	41.144	36.016	36.61	38.378	36.165	37.394	41.176	40.538	39.849	NaN	39.861
	40.805	37.585	42.089	39.25	40.221	41.4	39.401	40.466	42.767	40.161	35.786	41.345	35.499	37.556	37.31	37.993	35.637	41.073	40.797	38.346	NaN	38.552
	39.705	38.359	41.757	40.614	41.918	41.893	40.221	40.679	41.903	39.98	35.48	40.542	36.861	37.77	36.452	36.611	33.991	41.684	40.378	39.709	NaN	40.085
	40.209	39.534	42.12	39.633	39.626	41.345	40.314	38.138	NaN	39.548	34.587	39.832	36.074	38.035	37.91	35.026	37.167	41.636	40.238	40.024	NaN	39.844
	39.7	37.367	41.669	39.639	40.053	41.699	40.224	41.03	42.106	40.378	36.156	40.818	37.456	37.691	36.327	38.735	37.496	41.545	40.586	39.087	33.595	38.828
	39.095	39.204	41.975	41.016	40.128	41.85	39.167	40.207	42.465	40.456	37.134	40.122	37.551	36.694	34.859	36.829	37.85	41.463	41.095	39.753	NaN	38.903
	39.462	39.54	42.025	41.089	41.271	41.641	38.851	40.645	42.517	39.66	32.027	40.521	31.722	38.013	32.718	37.335	36.646	39.96	41.119	39.524	34.485	38.413
	40.251	37.736	42.011	40.884	40.763	41.045	39.742	39.56	NaN	39.986	37.777	41.056	34.791	37.208	33.98	37.746	38.878	41.181	40.757	38.25	32.959	39.799
	39.828	39.792	42.237	39.272	40.151	41.406	39.534	38.87	40.664	39.642	38.586	40.821	37.939	37.707	38.802	36.103	37.501	40.653	41.088	40.507	NaN	40.134
	40.382	39.051	41.785	40.715	40.37	40.946	39.93	40.062	42.497	40.732	35.661	41.102	32.047	36.143	35.25	34.192	39.254	40.449	40.608	39.624	NaN	39.174
	41.039	38.988	42.369	40.892	40.052	40.87	39.874	38.776	41.662	40.471	36.646	40.176	37.457	38.161	35.954	35.415	36.395	41.839	41.201	37.807	NaN	39.729
	38.804	37.604	41.576	38.285	40.803	41.669	39.432	40.946	42.024	40.639	37.524	40.778	33.816	37.924	38.128	36.964	36.506	41.8	40.783	39.595	NaN	38.311
	39.36	39.183	41.932	39.427	40.611	41.634	39.673	40.246	42.262	40.403	35.069	39.772	NaN	37.653	37.663	37.382	36.041	41.571	41.105	38.9	NaN	40.23
	36.88	38.956	41.339	40.642	40.876	41.536	40.191	40.227	42.584	39.704	36.513	39.054	35.515	37.945	37.576	39.003	37.382	41.187	40.713	40.118	33.455	38.895
	39.212	35.928	41.46	39.991	39.586	41.908	40.026	41.218	42.692	39.756	35.021	40.132	32.419	37.336	37.937	34.759	36.284	41.412	41.128	39.075	NaN	37.352
	40.944	35.66	41.177	40.24	41.718	41.38	40.336	39.518	42.053	40.024	35.799	40.304	35.641	37.697	37.157	37.43	33.864	41.383	40.401	40.45	35.945	39.724
	40.823	36.896	42.468	39.84	40.322	41.642	40.34	41.106	41.741	40.237	31.6	40.221	34.144	36.695	36.68	37.213	37.451	41.099	40.834	39.765	NaN	38.572
	38.576	38.313	41.059	40.204	40.151	41.362	39.686	40.69	42.332	40.634	34.427	40.538	36.64	36.14	37.259	37.052	36.193	40.819	40.529	38.335	34.924	39.987
	41.124	39.486	41.412	39.493	40.222	41.625	39.933	40.714	NaN	39.948	37.203	40.695	36.44	37.263	34.358	36.991	38.939	40.565	41.02	39.851	NaN	40.368
	39.869	38.168	42.312	40.276	41.54	41.173	39.708	39.881	42.209	40.829	34.878	40.253	35.866	37.533	37.544	37.139	37.517	40.872	40.506	38.719	NaN	39.466
	39.271	38.067	41.671	39.293	40.306	41.594	39.079	41.175	42.461	40.436	35.787	41.16	37.427	37.937	36.797	35.933	37.57	41.191	39.643	38.709	32.858	39.562
	41.473	39.868	42.152	40.627	40.709	41.86	39.257	40.639	42.924	41.193	34.291	40.701	37.424	37.346	34.321	38.138	36.594	41.161	40.298	39.874	NaN	38.653
	39.496	38.292	41.32	41.228	41.024	42.068	40.082	41.567	NaN	39.785	37.115	40.092	NaN	38.397	38.198	37.587	38.164	41.431	41.572	39.353	37.051	38.041
	38.852	39.905	41.982	40.623	40.258	41.805	39.018	40.075	42.392	39.674	36.841	40.264	36.622	37.017	37.454	35.709	34.032	40.781	39.396	39.729	37.315	40.153
	41.021	38.872	41.808	39.41	40.744	41.568	39.893	41.106	41.89	41.089	34.134	40.369	NaN	38.041	37.611	36.835	37.665	40.437	40.382	38.809	NaN	40.252
	41.086	39.368	41.174	40.086	40.025	41.711	40.281	40.862	42.26	39.964	39.174	40.934	35.782	37.237	37.902	36.879	35.084	41.383	40.4	40.224	NaN	38.936
	40.311	38.781	41.799	40.097	40.906	42.057	40.605	39.08	NaN	38.307	35.368	39.937	35.862	37.25	36.068	37.475	39.283	41.658	40.289	37.293	NaN	37.924
	38.265	39.169	39.968	39.454	40.065	41.332	40.589	40.856	42.08	40.472	36.455	40.325	36.067	38.521	34.527	36.396	37.73	40.597	40.624	40.028	NaN	38.233
	39.592	39.078	40.827	39.109	40.751	42.107	40.465	39.595	42.169	40.287	35.225	41.052	NaN	36.763	36.854	34.685	38.604	41.802	40.71	40.098	34.613	39.493
	38.823	39.533	41.913	41.294	40.691	41.009	38.713	41.163	42.929	40.308	36.405	40.613	36.168	36.586	35.557	37.883	38.607	41.01	39.983	40.452	NaN	39.519
	37.818	39.583	41.829	40.743	40.538	41.796	40.273	41.518	42.142	39.361	35.075	40.019	36.472	37.103	35.315	36.873	38.868	41	40.307	39.474	NaN	39.316
	39.717	35.903	41.71	40.456	41.002	41.368	39.676	39.182	41.845	40.621	37.293	40.726	NaN	37.178	37.071	38.017	37.815	41.057	40.137	38.949	32.977	38.813
	40.037	37.755	40.764	40.307	40.407	42.14	40.361	38.859	42.501	40.553	34.843	40.358	35.634	38.109	36.44	37.159	38.237	41.486	40.26	40.325	NaN	39.829
	38.973	38.025	41.587	40.014	40.329	41.606	39.482	40.098	42.399	40.805	37.475	40.834	37.438	36.56	37.922	37.29	35.992	40.596	40.068	40.766	NaN	38.366
	40.669	38.599	41.445	40.749	39.561	41.321	38.913	41.255	NaN	40.459	35.505	40.324	35.009	38.3	33.909	38.231	36.591	40.246	39.678	38.067	NaN	38.909
	37.961	37.415	41.038	39.203	40.871	41.611	39.703	39.701	41.915	40.88	34.327	40.564	36.976	37.594	34.921	34.738	36.65	40.694	40.535	40.212	NaN	39.442
	38.36	39.238	40.969	41.039	39.373	42.228	39.802	40.366	42.267	39.642	38.313	40.33	34.612	36.957	37.226	36.752	37.519	40.868	40.603	41.447	NaN	39.964
	40.032	38.553	40.574	39.207	39.915	41.366	40.457	40.432	42.544	40.361	31.688	40.174	31.078	36.935	37.011	35.464	37.463	40.968	40.71	39.512	33.989	39.436
	37.976	38.889	42.21	40.039	40.842	41.199	40.808	40.571	42.22	40.144	37.178	40.292	36.071	38.29	37.382	33.396	37.475	41.303	40.886	40.04	36.537	39.902
	39.291	39.189	41.37	39.569	40.712	41.899	39.108	39.571	42.906	39.843	35.936	40.832	NaN	37.066	38.18	36.745	38.194	40.676	40.137	39.33	NaN	39.631
	37.948	39.562	42.121	38.096	40.722	41.885	39.707	40.405	NaN	40.855	37.761	39.323	37.675	37.754	37.551	38.058	36.153	39.953	40.659	38.542	NaN	39.921
	39.164	39.35	42.686	40.096	40.331	42.194	39.798	40.333	NaN	41.064	36.956	40.747	37.166	36.855	35.325	38.015	39.715	41.812	39.79	39.622	NaN	37.877
	40.696	38.836	41.88	39.419	40.506	41.449	39.672	40.639	42.432	39.244	33.988	39.415	NaN	38.292	36.009	38.714	NaN	40.13	39.759	38.997	NaN	38.548
	37.466	38.663	41.263	40.505	39.888	42.084	40.283	40.63	42.278	40.514	36.072	40.163	35.316	37.126	36.788	36.331	37.543	40.886	40.571	40.064	NaN	39.876
	40.564	39.094	41.482	39.749	39.636	41.128	39.514	40.244	42.699	40.263	34.385	40.606	36.923	38.163	35.671	31.774	38.034	41.277	40.871	40.547	32.142	38.57
	41.224	39.302	41.937	40.726	40.644	41.679	39.886	41.218	42.415	41.172	37.88	40.267	37.086	37.649	37.172	39.066	37.392	41.949	40.53	40.329	36.939	36.42
	39.83	39.428	41.756	40.751	40.307	41.303	40.316	40.942	41.981	40.833	37.584	39.718	36.613	37.287	36.771	35.221	39.037	40.995	40.881	40.145	NaN	38.797
	38.747	38.612	41.016	40.657	40.559	41.111	39.361	40.416	41.96	40.997	35.057	41.371	34.829	37.861	34.826	36.732	37.878	41.005	40.297	39.38	37.192	37.33
	41.059	39.299	40.482	39.885	40.843	41.757	40.45	41.015	42.848	39.845	35.997	40.813	33.783	36.774	33.686	35.823	36.883	40.588	39.808	40.284	NaN	39.577
	39.268	39.351	41.109	40.829	40.845	41.688	39.769	39.784	42.33	40.264	37.278	40.369	35.351	37.84	36.848	NaN	38.607	41.625	39.914	40.19	NaN	38.901
	40.722	37.964	40.327	40.995	39.637	40.811	40.642	40.384	42.69	38.305	36.806	40.34	NaN	37.063	38.992	37.064	35.804	40.461	40.357	39.873	32.559	37.836
	39.189	39.348	40.938	39.315	41.181	41.71	39.923	40.11	42.498	39.871	37.027	41.134	32.672	38.526	36.582	35.352	39.185	41.724	40.835	39.105	NaN	39.747
	37.416	39.143	42.091	40.932	40.677	41.143	39.628	40.842	42.781	40.097	34.776	40.739	35.176	37.431	38.078	36.996	38.581	41.942	40.619	40.376	NaN	38.211
	40.512	38.716	42.1	39.271	41.122	40.886	39.108	39.388	41.946	40.404	36.723	40.324	35.493	37.773	38.127	38.207	36.901	41.799	41.182	38.551	33.536	37.685
	38.544	36.292	41.667	40.249	41.04	41.363	39.556	40.868	42.496	40.73	NaN	40.716	34.699	37.969	32.608	36.842	38.921	40.519	41.432	37.734	NaN	40.011
	39.122	37.756	41.701	39.577	39.978	41.673	40.362	41.223	42.156	39.899	37.57	40.204	36.381	38.492	32.457	35.457	37.004	41.285	40.958	40.053	NaN	39.853
	41.105	36.516	41.88	38.802	40.492	42.034	39.915	40.353	42.13	40.975	35.435	41.291	33.405	36.101	33.113	35.256	38.074	41.211	40.788	39.175	NaN	39.223
	40.654	39.072	40.302	40.856	40.579	41.503	38.931	40.327	42.353	40.565	37.595	40.805	33.597	38.152	38.213	37.086	35.492	41.371	40.103	39.298	33.151	37.657
	38.824	40.463	41.93	40.508	40.527	40.979	39.608	39.478	42.295	40.837	38.345	40.833	35.276	38.659	37.812	37.747	38.112	41.556	40.844	38.601	35.045	40.399
	39.531	37.355	40.909	40.738	40.707	42.128	39.685	41.232	41.809	40.195	NaN	40.989	35.981	37.54	36.392	36.071	37.173	41.321	40.063	39.956	33.747	40.477
	40.95	39.728	42.081	36.892	40.944	42.017	40.13	40.769	41.965	40.035	NaN	40.298	35.346	37.611	34.397	36.586	37.663	40.61	40.716	38.874	36.801	38.89
	40.072	38.437	42.109	40.689	40.857	40.947	38.976	40.7	42.465	40.832	35.728	40.653	35.789	36.159	37.931	36.867	37.681	41.502	39.967	40.43	NaN	39.848
	40.121	38.159	42.014	39.72	39.915	41.88	39.074	39.885	42.768	41.118	36.398	39.913	36.177	36.812	34.721	35.857	36.634	41.315	40.817	40.735	NaN	38.725
	40.35	40.254	42.615	39.522	41.124	41.41	39.625	40.626	42.746	40.508	35.597	40.488	33.912	38.193	34.998	36.708	38.348	41.506	39.26	39.881	32.612	39.057
	40.615	39.415	41.781	39.293	40.262	41.235	39.768	40.937	42.586	41.105	37.236	39.913	31.81	37.8	38.322	37.363	33.789	41.775	40.782	40.578	NaN	39.243
	37.599	36.727	42.054	40.738	40.196	41.631	40.066	39.568	43.119	40.287	36.088	40.47	NaN	38.54	36.478	35.471	38.063	41.629	41.026	40.145	NaN	37.961
	40.371	39.648	41.076	41.126	40.323	41.516	39.144	40.02	42.747	40.72	34.342	40.353	35.705	37.035	36.539	37.359	39.312	40.947	40.507	40.572	NaN	38.005
	40.752	39.048	42.54	38.774	39.635	41.087	40.287	41.13	42.297	40.786	37.827	40.851	NaN	37.639	34.95	32.784	34.446	41.419	40.446	40.685	37.781	37.398
	40.13	37.103	42.026	38.143	40.076	41.591	39.533	40.695	42.339	39.469	NaN	40.801	36.106	37.889	36.694	35.119	36.974	40.119	40.854	40.167	NaN	38.151
	40.748	39.441	41.757	39.862	40.698	41.964	40.209	39.31	42.287	38.724	36.177	40.868	36.894	38.253	37.376	NaN	38.02	40.763	40.434	38.846	NaN	40.123
	39.995	37.907	41.502	39.457	40.964	41.574	39.866	38.661	42.671	39.913	34.633	40.368	36.898	35.865	35.225	37.265	34.067	41.234	39.434	38.858	35.294	38.779
	38.831	39.319	41.387	41.231	40.025	41.724	39.246	40.677	41.956	41.275	38.665	40.885	36.765	37.671	35.987	35.164	35.015	41.011	40.39	39.12	NaN	40.184
	39.53	40.227	41.023	39.88	40.339	41.37	40.032	39.549	43.079	40.216	36.303	40.746	35.965	37.677	37.733	36.696	38.693	40.334	40.916	40.344	NaN	39.882
	39.061	38.698	42.219	39.873	40.345	41.389	39.124	40.301	42.708	40.508	32.097	39.537	36.428	35.937	38.269	36.572	37.751	40.508	40.975	40.752	NaN	39.825
	39.748	37.706	40.517	39.641	40.606	40.957	39.806	40.788	42.535	40.11	34.141	40.286	35.328	37.408	37.536	35.229	37.986	40.453	39.858	40.155	NaN	38.811
	39.815	39.328	41.501	40.289	40.975	41.759	39.176	40.617	42.462	39.693	38.509	40.842	35.759	37.928	34.282	36.514	34.833	42.327	40.94	37.514	NaN	38.429
	37.461	38.185	41.574	39.639	41.051	41.877	39.517	39.776	41.979	39.852	34.939	39.947	36.75	36.512	36.379	34.727	37.869	41.595	38.944	39.179	NaN	38.526
	38.984	40.023	41.953	38.797	40.557	42.34	40.209	40.667	42.379	39.702	37.648	40.419	36.176	37.554	33.725	35.344	31.542	41.471	40.278	40.311	34.637	40.065
	39.792	38.851	41.49	39.4	39.922	41.36	39.966	40.373	41.931	40.745	36.489	41.256	33.509	35.712	36.34	37.655	32.196	41.748	41.242	40.354	39.435	38.781
	39.703	36.064	41.502	39.269	40.268	41.727	40.05	40.725	42.29	40.385	34.672	39.861	36.535	36.999	36.58	37.14	38.35	41.18	40.556	37.412	NaN	39.509
	39.308	39.424	39.598	39.743	41.086	40.954	39.39	40.633	43.007	40.97	35.619	40.767	35.738	37.595	35.946	NaN	34.733	40.898	40.325	40.119	NaN	38.698
	39.358	38.255	41.254	39.252	40.835	40.53	38.852	40.53	42.172	39.837	33.07	40.387	35.342	37.695	35.621	36.468	34.456	41.077	40.679	40.905	NaN	39.04
	39.926	39.973	41.122	40.553	39.637	42.181	39.703	40.275	42.723	40.471	33.454	40.387	37.446	36.712	37.281	37.491	38.492	42.202	40.027	38.525	34.741	38.278
	38.591	38.338	42.025	40.011	39.863	40.731	38.651	40.365	41.495	38.711	38.44	41.025	36.41	36.168	37.092	35.988	37.665	41.346	39.632	40.175	35.82	39.869
	39.973	38.453	42.168	38.904	40.813	41.251	40.219	40.605	42.56	40.37	36.103	40.063	33.564	36.503	37.068	37.776	39.591	41.282	39.772	37.44	NaN	39.073
	40.071	37.248	42.617	39.928	40.745	41.625	40.135	41.334	41.806	38.507	36.916	39.654	35.76	36.909	37.35	36.633	36.892	40.781	40.336	39.44	35.584	39.394
	36.824	39.045	40.402	39.756	39.911	42.055	39.983	40.685	NaN	38.941	36.396	39.724	NaN	37.865	36.533	37.273	35.247	41.701	40.01	39.721	36.673	39.572
	36.918	37.963	41.288	40.715	40.5	41.536	39.348	39.499	42.088	40.378	36.414	40.505	36.869	36.61	37.531	37.088	38.875	41.156	39.727	39.126	NaN	39.227
	40.984	40	41.717	39.667	41.068	42.429	39.931	38.647	NaN	40.879	34.896	40.312	36.456	37.359	36.455	NaN	37.963	41.46	40.735	39.804	NaN	39.309
	39.289	38.348	41.185	39.414	41.052	40.994	39.206	40.918	41.75	39.326	38.864	39.913	33.937	37.395	37.825	36.91	38.378	41.491	40.567	40.863	NaN	37.906
	41.046	39.206	41.314	37.339	40.128	41.634	40.29	40.861	41.491	40.478	35.411	41.127	37.068	37.979	37.12	36.593	38.225	40.318	41.099	39.908	31.434	38.842
	39.115	38.672	41.401	39.981	40.048	41.32	38.803	41.551	NaN	39.456	38.82	40.206	34.073	36.75	32.093	36.094	36.305	41.957	40.079	40.792	36.17	38.833
	40.012	40.272	40.558	39.714	41.028	41.336	40.358	40.412	42.924	39.894	36.62	39.62	36.555	38.415	37.265	37.746	36.047	41.198	40.939	40.165	33.217	39.826
	40.144	39.286	42.129	40.435	40.133	40.756	39.939	40.174	41.125	39.626	35.043	40.39	33.619	38.203	37.45	35.97	37.609	40.803	40.236	39.707	32.273	39.979
	39.657	38.133	41.353	39.716	41.138	42.395	39.411	39.767	41.426	41.026	36.83	40.452	38.048	38.265	38.499	37.581	37.29	41.487	40.9	38.156	36.456	39.197
	39.838	38.568	40.986	40.713	41.022	41.472	40.417	41.6	42.506	40.489	36.052	40.019	NaN	35.516	34.269	35.009	37.468	40.059	40.076	38.759	NaN	39.352
	40.777	39.311	42.199	41.195	41.864	42.195	39.698	40.836	40.859	39.744	37.814	40.617	36.752	37.296	35.946	35.313	NaN	41.555	40.725	40.146	36.099	37.082
	37.95	39.13	41.979	39.832	39.724	41.588	39.843	39.692	42.185	40.511	36.534	40.299	36.761	36.382	37.156	37.702	38.63	41.514	40.505	36.814	NaN	37.818
	40.781	38.826	41.793	40.155	39.657	41.91	39.274	39.637	42.253	41.088	35.194	40.057	35.272	37.255	37.566	34.335	37.311	40.536	40.377	38.081	35.182	38.692
	39.811	39.427	42.575	39.845	40.36	41.304	39.625	40.74	42.384	39.493	36.988	40.029	37.059	37.426	35.824	38.564	37.262	40.579	40.952	38.684	NaN	38.854
	39.32	38.038	41.676	40.894	40.599	42.007	39.769	41.058	41.916	40.302	35.819	40.3	33.287	37.403	34.013	38.789	38.249	40.462	40.341	39.221	NaN	39.847
	40.115	39.461	42.233	39.896	40.195	42.405	40.164	40.05	NaN	40.337	32.312	41.134	32.633	37.617	38.223	36.144	35.848	40.541	40.875	40.295	35.32	38.345
	38.828	39.51	41.774	40.709	39.747	41.176	40.064	39.63	41.836	39.404	37.586	40.445	34.553	36.866	36.798	38.28	36.382	40.641	40.837	38.472	NaN	38.563
	40.279	37.067	41.827	39.475	40.914	41.83	40.42	39.379	42.839	40.611	37.997	40.489	NaN	36.829	35.675	37.557	35.445	41.308	40.83	40.097	NaN	38.803
	41.081	39.443	41.607	37.056	40.212	41.804	39.171	39.617	42.891	40.387	36.257	41.349	35.886	36.799	36.594	38.505	37.712	40.637	40.824	37.766	35.247	40.134
	39.126	38.4	41.456	40.49	40.746	41.853	40.206	41.451	41.452	39.413	34.574	40.952	36.142	36.515	34.723	35.211	36.671	41.314	41.053	41.139	NaN	39.573
	41.686	37.986	42.19	39.318	40.855	41.23	40.225	40.442	42.611	41.179	37.381	39.775	36.673	35.624	37.532	37.281	37.644	41.402	40.491	39.179	NaN	38.98
	40.572	38.219	42.065	40.426	40.378	41.773	39.293	40.429	42.074	39.867	36.192	40.785	33.416	37.056	38.75	35.461	35.519	41.313	40.567	39.005	NaN	38.298
	40.591	38.403	41.128	40.494	40.642	42.034	39.6	40.47	42.503	40.217	33.414	40.303	36.764	37.927	35.981	37.336	38.258	41.351	40.166	37.044	NaN	40.007
	41.397	38.622	41.285	39.806	40.662	41.614	40.645	39.784	42.836	39.844	37.137	40.53	36.119	35.267	37.783	35.537	36.286	39.999	40.38	40.131	34.261	36.88
	40.457	39.218	42.14	38.459	40.712	41.855	40.708	40.689	41.167	40.359	36.63	40.926	37.817	38.047	37.307	35.309	37.672	40.016	41.069	40.23	35.95	39.62
	38.84	38.871	42.103	40.624	40.419	41.726	39.651	40.725	NaN	40.852	38.697	39.711	38.162	37.656	37.434	34.434	38.601	40.684	39.866	38.321	NaN	39.062
	40.909	38.342	42.707	41.222	41.578	41.05	39.32	41.051	41.326	38.48	36.735	40.276	36.096	38.441	34.678	37.189	36.217	41.452	41.09	40.552	NaN	39.116
	39.175	39.548	41.871	38.104	40.823	40.874	39.193	40.498	42.184	40.342	36.835	40.294	33.909	38.199	33.734	38.038	38.199	41.615	40.051	38.764	36.269	36.972
	37.016	39.756	40.816	40.823	40.391	41.798	39.437	40.512	42.063	40.287	37.443	39.031	33.34	37.258	32.818	36.664	37.336	40.695	40.568	40.703	NaN	39.445
	40.029	39.43	42.119	40.874	41.019	40.845	39.369	41.138	41.892	40.38	37.369	40.685	37.237	37.648	36.049	37.759	39.007	41.418	40.579	39.478	NaN	39.997
	40.21	38.955	40.492	40.287	40.678	42.45	39.668	39.251	42.138	40.463	32.134	39.857	35.83	36.61	33.514	34.093	36.593	41.329	40.322	38.236	35.017	38.374
	37.712	37.308	41.098	40.577	40.833	41.482	39.155	40.623	42.685	40.292	37.999	40.993	32.78	36.209	38.349	37.791	38.554	41.116	39.857	38.109	NaN	40.091
	41.383	40.336	41.755	41.18	40.289	40.955	39.616	40.199	42.827	39.397	38.011	40.115	35.621	35.112	37.24	36.449	37.49	40.962	40.144	39.373	33.167	40.045
	38.098	36.287	41.979	40.194	41.006	41.478	39.35	40.469	43.111	40.054	35.172	41.044	32.21	37.579	35.096	36.179	36.704	40.694	40.242	39.675	NaN	39.387
	40.896	39.752	41.595	39.594	40.714	42.11	39.036	41.217	42.113	39.883	34.344	39.616	37	38.181	35.681	36.87	35.479	40.987	39.861	40.607	NaN	39.771
	40.166	38.066	41.425	39.122	40.56	41.323	40.198	41.236	42.515	40.386	35.624	40.72	35.113	37.503	37.857	37.718	36.926	41.908	40.03	38.38	NaN	39.93
	40.268	38.793	41.24	40.614	39.761	41.853	39.352	39.775	42.645	40.986	35.558	40.444	36.381	37.005	37.791	36.755	38.233	41.327	40.556	39.903	NaN	38.797
	37.955	39.632	42.139	40.501	40.574	41.265	39.914	40.75	42.104	39.914	35.618	40.33	36.183	37.831	38.637	34.322	38.249	41.205	40.217	40.686	NaN	38.776
	37.018	37.587	41.785	41.03	40.044	41.523	39.771	41.512	42.352	41.043	39.134	39.342	35.353	35.67	35.482	38.607	39.449	40.395	40.84	37.932	NaN	40.086
	39.59	39.62	42.002	39.149	40.792	41.328	39.469	40.948	41.221	39.505	37.299	40.719	34.655	37.966	36.125	34.995	36.623	41.203	40.262	39.624	NaN	36.287
	38.506	38.581	41.752	40.219	39.072	41.842	40.685	41.262	42.372	40.151	37.708	39.352	33.262	37.738	36.536	38.685	38.02	41.516	40.396	40.375	NaN	39.463
	39.851	36.799	41.12	40.182	40.746	41.332	40	40.783	42.934	40.406	35.597	40.607	34.421	37.505	37.144	38.145	35.622	41.744	40.56	38.375	34.107	38.871
	40.878	38.062	41.262	38.384	40.424	40.882	39.35	40.294	42.684	40.627	34.213	39.968	36.799	37.119	35.104	38.224	37.631	40.559	40.966	39.178	35.498	39.266
	37.732	38.313	40.155	39.957	40.185	41.783	40.096	40.943	43.051	40.521	36.017	39.875	35.626	38.016	NaN	33.916	34.731	41.094	40.155	39.287	35.06	39.754
	38.669	36.909	41.241	38.973	40.201	40.744	40.441	41.354	42.653	39.839	31.966	39.4	36.433	37.958	37.733	37.967	35.788	42.055	40.411	37.656	NaN	38.459
	40.256	38.946	42.406	39.149	39.364	41.971	40.15	39.599	41.38	40.161	36.784	41.378	NaN	35.677	37.656	34.635	35.49	41.449	40.214	40.595	NaN	37.866
	37.527	37.521	41.486	40.355	41.216	41.404	39.521	41.242	NaN	39.614	NaN	39.906	34.266	36.527	32.61	35.196	38.344	41.198	40.572	38.958	NaN	40.083
	39.905	39.157	42.299	38.134	41.144	42.009	40.043	39.074	42.723	40.571	36.806	40.837	36.912	37.372	35.794	37.3	37.423	40.965	39.703	40.541	NaN	39.32
	37.183	39.131	41.437	40.364	40.652	42.291	40.384	39.806	42.725	40.245	37.266	40.127	34.676	37.736	35.242	34.059	37.22	39.968	40.868	39.95	32.292	39.052
	39.349	37.667	41.712	40.827	40.591	41.649	39.666	40.717	42.996	40.127	36.946	39.871	36.681	36.837	37.55	36.491	37.713	41.604	40.977	39.766	32.887	39.101
	37.727	38.661	42.145	40.742	40.271	41.395	38.163	41.165	42.277	39.76	39.261	40.475	NaN	36.817	35.405	35.503	35.738	40.018	40.809	40.238	NaN	40.252
	40.935	38.79	40.991	40.306	40.529	41.548	39.608	40.232	41.909	41.189	36.188	38.884	36.039	37.088	33.46	37.757	38.427	41.08	40.567	38.703	NaN	39.94
	38.116	38.723	41.227	40.599	40.759	42.002	40.291	40.677	42.83	39.951	38.253	40.039	36.059	37.25	33.78	37.704	36.115	41.554	40.87	40.121	NaN	39.704
	39.815	36.108	40.97	40.207	40.267	42.034	38.967	40.094	41.349	40.201	35.661	41.109	37.59	38.101	37.998	37.113	35.963	NaN	39.46	39.337	NaN	38.262
	39.259	37.935	42.45	39.387	38.967	40.959	39.548	39.711	41.985	40.164	36.581	38.723	36.369	37.032	37.983	36.676	38.062	40.279	39.194	40.604	35.603	40.025
	40.095	38.455	40.858	40.386	40.497	41.701	40.049	41.397	42.32	40.179	37.331	40.347	NaN	37.049	32.6	37.975	38.439	40.691	40.932	39.591	NaN	40.464
	41.227	38.478	40.766	40.88	40.66	41.61	40.429	40.603	43.007	38.61	NaN	39.983	34.982	37.641	38.71	37.47	37.747	41.969	40.127	37.488	36.404	39.405
	38.984	39.967	41.605	41.026	39.702	42.133	39.094	41.048	42.962	39.598	36.544	40.169	37.82	37.093	37.032	38.636	37.114	40.958	40.516	38.508	NaN	39.332
	39.595	37.175	42.158	41.343	40.076	41.165	39.007	41.849	41.817	40.259	37.274	40.563	36.606	38.116	34.854	30.948	36.845	41.237	39.836	38.959	NaN	40.19
	40.024	38.286	42.196	40.95	40.624	41.812	40.093	39.158	41.79	40.39	37.987	40.907	33.74	38.249	35.419	37.329	36.027	40.91	40.977	39.805	NaN	37.747
	40.409	36.371	40.661	39.244	40.059	41.472	40.992	41.137	42.623	40.072	32.52	40.263	36.203	37.644	36.264	34.188	36.736	40.857	40.781	38.547	35.877	38.958
	39.662	36.951	41.492	40.368	40.215	41.437	40.105	41.197	42.433	39.908	38.318	39.743	35.751	38.217	37.352	37.553	37.692	41.678	40.622	39.686	NaN	37.856
	39.918	38.617	41.428	39.711	40.026	41.968	38.654	40.865	42.977	40.005	39.143	40.172	37.182	35.072	37.445	32.929	34.413	39.083	40.17	39.547	32.897	38.768
	38.711	38.702	41.648	40.997	41.029	41.779	40.809	41.023	NaN	40.516	36.535	40.879	NaN	37.366	37.877	38.433	35.677	40.112	40.831	39.727	NaN	38.827
	40.268	39.537	42.357	40.541	40.701	41.844	39.855	40.799	42.737	40.696	35.544	40.364	36.911	37.085	35.637	37.442	34.712	41.348	40.145	39.949	NaN	39.157
	39.352	39.587	42.116	38.621	40.224	41.921	39.925	41.043	42.303	40.395	37.576	40.137	36.671	37.089	35.519	36.377	37.325	41.225	40.313	40.757	NaN	39.067
	40.326	38.378	42.154	40.503	40.032	41.199	39.366	40.785	42.253	40.299	33.567	39.965	36.547	38.462	36.576	35.789	38.302	41.228	39.369	40.35	35.535	39.89
	39.449	39.134	41.298	40.027	40.473	41.983	39.591	39.848	41.709	39.792	38.007	41.014	36.533	38.109	37.793	35.879	35.585	41.405	40.746	38.323	34.881	40.126
	38.889	38.541	42.249	39.725	40.824	41.911	39.662	39.981	42.267	39.673	36.736	41.279	33.859	37.089	38.564	NaN	38.413	40.596	40.926	38.728	NaN	39.575
	39.089	40.015	41.099	40.979	40.537	41.442	38.699	40.111	42.392	40.002	38.168	40.699	35.336	37.623	37.607	35.859	33.23	41.391	40.411	39.926	NaN	39.181
	40.313	40.291	41.487	39.796	40.643	41.429	38.998	41.001	41.812	41.03	35.21	40.648	33.438	37.494	36.44	37.793	37.566	41.557	41.29	40.259	NaN	38.76
	39.572	39.021	41.71	39.1	40.105	41.785	39.78	41.108	42.584	40.261	36.815	40.622	31.942	38.641	35.227	38.192	37.956	40.688	40.755	41.071	NaN	38.498
	41.26	39.184	41.265	39.313	40.606	41.223	40.54	39.162	42.094	40.168	34.767	40.237	32.868	38.069	38.598	33.911	37.675	41.256	40.316	37.401	33.799	40.425
	39.577	39.469	41.766	40.07	40.998	42.107	40.257	40.415	42.499	40.496	37.018	40.394	32.476	37.625	35.115	35.309	38.446	41.373	39.568	38.755	NaN	37.257
	38.773	37.605	41.988	41.013	40.892	40.769	40.496	40.728	42.189	39.86	37.94	38.878	38.061	38.078	36.107	37.266	36.719	40.496	40.426	39.792	NaN	39.586
	38.955	38.769	41.783	39.834	41.216	40.684	39.219	38.987	42.611	40.625	32.376	40.388	34.989	37.73	36.948	35.848	36.967	41.455	40.031	39.207	32.616	40.84
	39.299	37.423	42.059	39.684	40.563	42.104	40.977	40.442	42.222	39.421	37.697	40.127	34.222	37.7	38.643	36.96	38.931	40.779	40.597	39.815	NaN	40.15
	41.562	35.739	41.317	40.847	39.711	42.079	40.116	40.924	42.25	40.5	35.533	39.996	37.227	36.713	32.255	35.608	38.16	40.984	40.617	38.326	32.246	38.921
	40.004	39.67	41.692	41.011	39.809	42.138	39.878	40.306	41.096	40.14	34.891	40.332	36.619	36.486	36.938	37.542	35.849	40.641	40.917	40.392	NaN	39.617
	39.571	37.021	41.877	41.09	40.882	42.065	40.637	40.918	42.024	39.831	37.735	40.355	34.756	36.427	34.167	38.543	36.221	41.207	40.224	40.833	NaN	40.379
	39.835	38.933	40.886	37.684	40.925	42.018	39.724	39.053	42.491	39.548	36.847	40.872	33.386	37.885	38.227	35.831	35.453	41.651	40.971	39.203	35.388	40.046
	39.862	38.785	41.664	39.955	40.84	41.338	40.765	40.527	42.63	40.312	35.161	40.135	35.351	37.571	34.873	35.365	38.307	40.559	40.575	39.702	NaN	38.687
	40.799	39.949	40.681	40.284	40.885	41.498	39.906	41.187	42.664	40.947	37.94	40.537	31.323	37.006	34.753	35.258	37.675	41.246	40.773	39.966	NaN	38.992
	39.832	38.685	41.776	40.214	40.855	41.786	39.215	40.554	42.377	39.288	37.703	40.462	37.063	37.018	36.517	37.701	35.959	40.866	40.157	39.49	31.714	40.149
	40.419	36.766	42.26	36.747	41.031	41.709	39.904	40.285	42.579	39.707	37.517	39.744	37.964	36.273	37.406	37.594	37.668	41.167	40.913	36.742	34.406	37.54
	40.116	38.109	41.714	40.097	40.115	41	40.334	40.05	NaN	40.655	36.007	40.825	37.153	37.294	33.601	36.913	37.872	40.113	39.894	40.526	NaN	38.537
	38.797	38.182	41.125	39.86	40.579	41.694	39.853	40.582	42.504	40.449	34.805	40.794	33.762	36.341	31.986	NaN	39.002	41.067	40.306	38.992	NaN	40.006
	40.906	39.263	41.402	39.998	40.371	41.405	39.21	40.846	42.705	40.348	36.115	40.285	33.624	37.915	35.028	38.249	36.283	41.292	40.45	38.609	NaN	38.105
	38.834	40.104	41.1	38.786	40.485	41.507	40.457	40.347	43.021	40.139	36.666	40.62	NaN	37.486	36.775	35.77	36.272	40.999	40.815	39.633	NaN	39.35
	40.504	38.434	40.727	41.146	40.477	40.311	40.674	41.206	41.847	40.55	35.212	39.685	37.598	37.892	37.35	37.357	34.627	41.086	39.527	40.237	NaN	39.216
	38.691	38.739	42.235	39.243	40.379	41.609	39.914	39.77	42.567	39.201	37.488	40.875	36.922	37.409	36.419	37.08	39.289	41.005	39.722	37.557	33.843	38.038
	38.719	37.283	41.343	39.437	39.884	41.428	40.272	40.023	41.92	39.743	37.553	40.903	37.153	38.231	37.418	33.623	34.981	41.338	41.287	38.861	NaN	39.925
	40.31	36.39	41.686	40.039	41.245	42.148	40.274	39.464	42.836	40.048	36.39	40.36	36.059	38.342	35.596	36.55	NaN	39.86	40.394	36.607	NaN	38.964
	39.353	39.186	41.852	40.894	41.108	41.756	40.018	41.669	43.025	40.757	37.473	40.417	36.751	37.536	38.91	36.42	35.553	40.667	40.131	40.839	NaN	39.036
	38.34	38.922	41.394	40.632	40.443	41.065	40.489	40.726	42.246	39.748	34.22	40.45	37.046	37.393	35.617	37.843	38.476	40.713	40.537	40.347	NaN	40.02
	40.39	38.281	41.379	40.85	41.261	41.818	39.651	40.933	42.372	39.777	36.33	41.34	36.803	38.319	38.405	38.023	33.997	40.616	40.474	39.387	36.383	38.625
	40.888	39.479	41.482	40.756	40.937	41.695	40.171	41.552	41.318	39.688	37.392	40.006	36.223	38.656	32.218	37.816	36.318	40.478	39.729	40.441	NaN	38.74
	38.727	40.414	41.374	39.159	41.105	42.215	40.406	41.545	42.683	40.744	35.284	40.538	38.01	37.661	37.971	37.609	37.212	40.231	40.823	34.94	NaN	38.918
	40.434	39.249	42.451	40.041	39.778	41.441	39.094	40.638	42.061	40.472	37.316	40.7	37.1	38.322	35.963	36.682	35.455	41.218	40.328	37.131	NaN	39.35
	40.584	38.485	41.466	39.124	39.212	41.759	39.983	40.325	41.925	40.248	37.337	39.879	36.25	37.935	34.587	36.813	38.996	40.528	40.702	39.855	37.237	38.651
	37.158	38.893	41.402	39.654	40.163	41.684	39.031	40.426	41.975	39.176	36.951	41.024	36.513	37.259	36.822	37.158	34.241	41.397	40.449	37.954	NaN	37.72
	40.195	39.009	41.383	40.937	40.576	41.747	39.006	39.514	42.132	40.693	NaN	40.952	NaN	37.535	35.96	37.278	36.453	41.679	40.566	39.84	36.297	37.478
	38.553	39.167	40.797	38.54	40.825	42.306	40.393	40.614	41.925	40.438	37.485	39.886	34.24	38.179	38.071	37.539	33.809	41.503	41.141	39.216	36.182	39.371
	41.112	38.938	41.039	39.733	40.406	42.221	39.733	39.567	41.803	40.192	38.988	40.013	36.585	37.544	36.347	37.154	38.513	41.461	40.316	39.327	NaN	38.589
	37.197	38.706	42.013	40.748	40.936	41.534	39.832	40.771	NaN	40.831	35.307	40.034	NaN	36.691	36.882	38.286	35.883	41.762	41.173	39.414	31.466	39.59
	38.901	37.745	42.51	39.698	40.709	42.074	39.518	40.334	43.014	40.49	37.77	39.992	33.341	37.646	37.087	36.863	34.756	41.283	40.8	39.471	35.47	39.053
	41.062	36.287	41.768	40.112	41.076	41.799	40.068	41.115	42.919	40.662	34.039	40.234	35.713	36.63	35.199	37.635	38.543	41.074	40.732	39.767	NaN	38.308
	40.711	39.081	41.42	41.17	40.845	41.944	39.888	39.944	42.031	39.095	37.805	40.048	32.954	37.719	36.062	37.511	36.984	41.211	40.498	39.03	NaN	39.82
	39.052	37.716	40.555	39.333	40.692	41.575	39.316	40.215	43.114	39.527	33.886	40.13	33.38	37.679	35.81	33.093	37.657	40.631	41.103	40.852	NaN	39.552
	40.096	37.778	41.78	39.352	41.003	42.013	39.559	39.523	41.987	40.146	37.543	39.636	NaN	38.343	31.47	37.106	38.872	41.387	39.948	39.39	33.792	39.633
	38.701	37.301	41.814	38.218	39.887	41.588	40.675	39.813	42.423	39.402	36.454	39.566	35.962	36.415	38.795	33.727	39.058	41.342	40.27	38.721	NaN	39.277
	40.581	39.89	42.387	40.589	39.34	41.547	39.683	39.666	39.841	41.305	37.642	40.346	36.322	36.689	35.8	36.652	36.144	41.085	39.928	40.018	34.416	40.303
	39.723	38.255	40.663	41.31	41.102	42.275	39.397	39.357	42.641	41.03	36.816	40.613	38.239	37.14	36.312	33.179	39.382	40.946	40.845	40.021	38.516	38.203
	38.96	37.989	40.786	39.915	40.809	41.726	39.804	40.49	42.502	39.018	37.032	40.812	33.523	38.29	37.573	33.367	33.186	40.897	40.364	39.999	NaN	39.641
	38.879	38.603	40.529	38.223	40.159	41.142	40.011	40.789	42.98	39.921	36.84	41.103	31.738	36.901	38.504	35.915	38.014	41.249	40.778	40.043	34.729	38.912
	40.629	37.663	42.045	37.403	40.678	41.374	40.08	39.866	NaN	40.262	35.912	40.355	36.782	37.656	36.018	37.092	32.935	41.434	41.055	38.28	36.514	39.307
	39.459	39.485	40.628	41.057	40.356	41.32	40.38	39.23	42.616	40.717	34.171	39.467	35.818	38.475	36.123	35.587	36.813	41.79	40.647	39.971	NaN	40.042
	38.263	39.559	42.377	40.346	39.729	42.134	39.988	40.099	42.208	40.082	37.098	40.517	33.82	38.459	34.387	36.869	38.57	41.246	41.06	39.673	NaN	38.896
	40.778	38.535	40.595	40.265	40.831	40.964	39.358	40.16	42.29	40.096	34.999	39.774	33.529	36.772	34.669	35.437	34.772	41.472	40.707	38.908	NaN	39.678
	40.119	39.107	42.378	39.696	40.439	40.853	38.818	40.019	41.989	40.545	36.423	40.207	32.477	37.333	37.409	36.216	36.683	41.236	40.042	40.281	NaN	39.209
	39.487	39.45	41.352	39.671	40.319	42.008	40.309	39.349	42.377	40.706	36.42	40.529	37.237	37.563	37.64	34.752	36.54	40.364	40.234	40.05	NaN	38.638
	39.75	39.854	42.312	38.3	40.494	41.839	39.79	40.575	42.532	38.991	37.228	40.157	35.98	37.174	34.15	36.093	31.727	40.907	41.562	40.48	NaN	39.936
	40.436	39.002	41.436	40.395	40.42	41.777	40.204	40.397	42.535	39.841	36.089	40.79	36.782	37.272	37.641	38.024	37.544	41.389	39.726	40.063	NaN	38.313
	40.434	39.37	42.416	39.352	40.829	41.083	39.819	41.294	40.794	40.97	34.942	39.885	35.489	38.15	35.086	37.108	37.505	41.183	40.621	39.168	34.849	38.25
	40.134	39.623	42.042	40.023	40.577	41.338	40.363	39.942	42.597	39.797	36.675	40.326	35.951	36.765	36.859	37.123	39.133	41.598	40.522	39.552	31.764	38.587
	38.218	38.72	41.942	38.816	41.197	41.783	39.913	40.647	42.844	39.225	37.685	39.613	34.689	37.1	37.424	37.6	37.124	40.638	40.527	40.24	35.601	40.402
	40.162	38.415	41.456	40.187	40.9	41.121	39.364	41.478	NaN	40.19	36.71	41.016	37.232	37.063	36.772	37.88	35.21	41.008	41.139	38.807	34.837	39.382
	40.126	40.046	41.074	40.308	40.037	41.253	39.95	41	42.621	41.025	36.409	40.042	37.035	38.271	37.891	36.87	37.537	41.307	41.296	38.643	34.759	40.368
	38.843	36.266	40.586	40.602	40.518	41.789	40.062	41.192	40.992	40.677	34.491	40.392	35.49	38.099	35.786	36.479	37.247	41.274	40.507	39.493	33.975	37.913
	40.65	39.367	42.37	39.702	40.652	41.374	39.713	39.476	43.125	39.742	34.526	41.19	36.232	37.755	36.095	38.26	38.764	40.833	40.363	39.147	36.509	38.563
	41.336	40.12	42.117	39.889	40.392	41.665	40.095	39.48	42.266	41.034	37.117	40.588	37.263	37.77	37.772	37.888	37.762	41.031	39.73	38.095	NaN	38.417
	39.214	38.4	40.632	40.471	40.523	41.922	40.104	39.736	42.889	40.231	37.678	39.802	35.361	37.494	30.304	36.237	35.443	40.453	40.633	40.174	36.149	39.456
	39.39	39.955	40.445	39	40.744	41.669	40.316	40.677	42.672	40.614	32.34	39.941	32.985	37.058	37.157	37.66	38.448	41.828	40.348	38.197	NaN	39.969
	41.162	37.593	41.778	39.335	40.529	41.287	40.387	40.973	42.288	39.893	36.137	39.731	35.314	37.924	36.06	32.488	37.244	40.333	40.656	39.579	34.925	40.327
	40.864	39.802	41.933	40.971	39.574	41.822	39.097	39.413	42.16	41.586	36.614	40.957	35.511	37.299	37.483	37.368	37.835	40.613	41.109	40.037	36.604	38.6
	39.978	37.763	41.797	40.856	40.599	41.843	40.907	40.796	42.318	40.298	37.843	39.952	35.592	37.75	36.49	36.62	36.069	40.869	40.493	40.262	32.465	38.366
	40.196	39.303	41.971	39.847	40.612	41.913	40.07	41.023	42	39.674	38.564	40.1	35.969	38.001	38.266	37.798	37.981	41.215	40.759	39.665	32.152	39.093
	38.293	39.213	41.517	38.061	40.124	42.044	39.431	40.271	42.017	40.466	38.987	39.924	37.394	37.013	32.9	33.947	36.944	41.577	40.175	39.942	NaN	38.12
	39.092	38.273	42.495	39.231	40.764	41.774	40.233	40.82	41.026	40.814	37.26	39.698	36.635	38.631	37.476	36.942	36.597	40.65	40.441	40.98	31.696	39.997
	39.911	39.181	42.114	40.81	40.804	41.687	38.955	40.813	41.681	38.21	36.551	40.626	36.409	36.534	34.152	36.921	38.388	41.382	40.585	40.29	34.977	40.165
	40.711	38.837	40.78	40.672	39.39	40.996	40.146	40.327	43.028	39.651	35.984	40.687	35.39	38.515	35.533	37.202	37.437	40.138	38.543	39.961	33.103	38.848
	41.448	38.259	41.014	39.406	40.484	41.598	40.107	39.358	NaN	40.828	37.106	39.9	33.816	36.876	37.362	36.698	36.236	41.485	40.189	38.95	NaN	39.504
	39.513	39.93	41.839	39.745	41.454	40.566	39.917	40.184	41.957	39.463	36.336	40.338	36.39	38.312	33.157	35.577	33.484	41.591	40.515	40.558	NaN	39.083
	39.179	38.429	42.083	39.99	40.399	41.508	39.328	39.067	NaN	37.791	36.732	40.067	38.005	38.152	37.018	38.199	35.626	40.163	41.008	38.516	NaN	39.07
	40.298	40.079	41.318	39.212	39.531	41.772	39.093	40.127	41.725	39.892	38.864	40.244	36.054	37.477	36.772	37.073	37.55	41.051	40.71	41.338	NaN	38.924
	39.435	38.879	42.237	40.214	40.498	42.088	38.615	41.305	41.703	38.955	36.066	40.602	NaN	36.894	33.721	37.873	37.144	41.267	39.272	39.73	34.907	39.209
	40.114	40.446	41.576	39.337	39.664	42.279	40.362	40.837	42.67	39.975	33.929	39.948	34.683	36.774	37.129	34.416	38.726	41.453	40.018	38.677	35.264	39.172
	37.491	37.902	41.217	38.949	39.951	41.83	40.121	40.177	42.328	40.56	34.403	40.668	36.979	37.723	36.333	37.063	36.67	41.182	40.893	41.026	NaN	38.945
	40.005	37.341	41.535	39.952	41.537	41.567	40.726	40.732	41.476	39.575	35.948	40.871	NaN	37.604	34.483	38.339	37.654	41.406	40.727	39.606	34.237	39.469
	40.093	37.852	41.872	41.472	39.788	41.871	39.508	40.864	43.103	40.524	35.547	40.073	37.682	37.098	34.055	38.755	35.182	41.475	41.05	39.571	NaN	37.634
	38.119	40.066	41.119	39.936	41.333	41.552	40.259	39.003	41.303	38.906	34.534	39.713	37.182	38.599	37.313	32.718	35.044	40.684	40.63	39.899	NaN	38.751
	38.504	38.234	42.084	39.905	40.555	41.9	39.979	40.203	42.571	40.611	36.3	40.679	36.65	36.763	34.839	33.325	37.968	41.967	40.518	40.455	36.112	39.74
	39.285	38.935	42.121	39.235	39.963	42.036	39.576	39.824	41.851	39.428	37.209	40.238	33.667	37.838	37.613	38.106	37.684	40.947	40.986	39.219	NaN	40.306
	40.437	37.427	41.674	38.495	39.374	41.77	39.485	40.987	NaN	40.165	36.553	40.161	31.027	37.395	37.561	34.683	36.091	40.712	40.225	40.316	35.849	39.904
	39.726	39.558	42.082	38.066	41.071	42.277	40.501	40.518	42.959	40.309	NaN	40.697	36.766	37.31	33.984	35.16	38.059	41.142	40.69	41.409	33.395	39.028
	37.79	39.94	42.311	40.84	40.582	41.06	40.608	41.307	42.618	39.646	34.941	40.368	38.126	37.976	37.315	36.156	35.348	41.084	40.377	39.451	NaN	38.106
	40.215	39.463	42.023	40.656	40.152	42.047	39.834	41.021	42.225	39.758	36.058	39.463	33.227	37.974	NaN	34.283	35.396	40.511	39.172	39.27	NaN	38.052
	39.871	37.676	42.441	40.226	40.601	40.991	39.22	40.617	42.447	40.462	36.741	40.169	36.135	37.158	35.94	33.42	33.713	41.829	40.501	35.867	NaN	37.875
	40.3	38.94	40.683	38.501	41.003	41.714	39.45	39.128	42.738	39.881	37.222	39.456	37.341	37.68	36.319	38.055	37.916	41.21	40.526	39.291	NaN	39.752
	40.588	38.314	41.532	39.096	40.531	41.035	39.507	40.292	42.454	41.357	33.537	40.384	36.351	37.553	35.977	35.335	36.487	40.385	39.712	40.387	NaN	39.086
	39.742	37.289	41.891	40.629	40.354	41.266	38.85	40.659	NaN	40.742	35.514	40.743	34.476	37.395	37.468	37.17	39.113	40.522	41.087	39.652	NaN	35.882
	39.864	38.094	41.478	38.318	40.937	41.951	40.515	40.228	41.943	40.807	36.213	41.005	34.387	37.56	37.67	35.603	37.132	40.786	40.906	40.411	NaN	39.95
	40.453	39.086	41.911	40.367	41.17	41.626	39.725	39.924	42.389	40.781	35.182	41.545	37.119	38.217	36.668	38.684	36.2	40.858	40.237	40.673	32.425	39.093
	38.522	36.114	41.619	40.756	41.632	41.417	40.36	40.27	42.216	40.228	36.703	39.826	36.31	37.55	36.633	37.96	36.907	41.796	40.691	40.133	NaN	38.903
	40.422	37.198	41.663	39.421	41.244	41.835	40.646	39.6	42.062	40.571	36.222	40.986	34.633	37.233	37.265	37.604	36.67	40.72	40.114	39.863	33.685	40.137
	38.835	39.41	41.355	40.26	40.69	41.828	40.336	40.634	NaN	40.369	35.742	40.465	35.781	36.353	39.361	35.712	38.109	41.485	40.382	39.84	32.403	39.992
	40.259	39.088	42.151	39.021	39.842	41.533	39.4	39.713	41.819	40.286	34.712	40.094	33.643	38.068	39.055	36.977	36.471	41.779	40.062	37.961	34.22	39.416
	38.255	39.381	42.093	39.979	40.33	41.694	40.704	40.444	42.13	39.95	38.052	41.215	32.8	37.693	37.076	37.347	34.529	41.678	40.73	40.325	34.084	39.32
	38.566	37.894	41.06	39.109	39.844	41.824	39.998	40.078	41.45	41.481	35.07	40.397	NaN	37.344	31.786	37.653	36.174	40.857	39.47	38.766	NaN	39.64
	40.754	37.774	41.167	41.172	39.918	41.095	39.903	40.477	42.932	40.341	37.569	40.015	37.553	36.893	35.965	36.987	37.698	41.532	40.877	36.13	NaN	38.92
	37.47	38.998	40.753	39.041	39.658	41.768	39.553	40.59	NaN	39.891	37.488	40.381	36.943	36.53	NaN	38.326	36.117	40.873	40.295	40.387	NaN	39.75
	40.531	39.217	41.161	40.208	40.814	41.504	38.977	41.159	NaN	39.692	38.044	40.781	36.754	37.137	37.562	34.635	34.874	41.546	40.406	39.735	32.45	39.959
	37.563	38.924	41.42	40.585	41.24	41.478	39.886	39.57	42.194	39.54	33.688	40.647	37.782	37.786	38.253	37.674	36.967	41.859	41.121	40.237	36.739	39.124
	37.265	38.75	41.4	41.072	39.722	41.359	39.41	40.652	42.227	41.07	36.453	40.652	36.468	37.85	34.197	37.269	38.599	41.549	40.642	38.47	NaN	37.984
	41.176	39.368	42.173	40.918	39.815	41.716	39.838	40.616	42.927	40.512	35.08	40.072	37.155	38.089	37.377	36.947	37.901	41.073	40.421	39.152	35.871	39.807
	39.907	39.242	41.946	40.48	40.46	41.483	38.884	39.547	42.41	40.201	37.384	39.972	35.227	38.312	37.749	36.092	38.195	41.511	41.209	39.034	NaN	39.605
	40.33	37.137	42.082	40.581	41.286	42.25	39.012	38.804	42.399	40.27	35.64	39.932	NaN	36.092	37.692	37.301	36.714	41.453	40.536	37.071	NaN	39.144
	39.854	39.374	41.718	38.144	40.629	41.929	39.312	40.099	42.987	40.1	38.786	40.385	35.357	38.312	32.995	36.577	37.866	41.769	40.255	39.761	NaN	39.586
	41.02	37.004	41.931	39.915	40.968	40.239	40.424	40.696	41.797	39.896	37.541	40.241	NaN	38.02	37.77	39.195	38.152	40.606	40.404	40.037	33.119	39.916
	40.899	37.749	42.326	39.087	40.691	40.977	40.097	40.447	42.252	40.601	36.505	39.745	34.5	38.127	38.126	38.063	38.642	41.226	40.208	39.676	34.734	37.818
	38.552	36.915	40.774	40.422	39.384	41.858	39.649	39.211	40.976	40.998	NaN	40.613	32.973	36.893	36.146	36.047	36.163	41.251	41.038	39.33	NaN	39.5
	39.492	39.132	41.219	40.893	40.512	41.873	39.883	39.681	41.534	40.792	35.275	40.04	36.444	37.249	36.413	35.577	NaN	41.022	40.747	40.191	34.128	39.049
	39.837	39.238	41.399	37.826	39.226	41.895	39.406	40.693	41.991	40.273	31.915	39.095	NaN	38.269	36.977	36.059	38.41	41.267	40.704	40.44	31.413	39.582
	41.077	37.503	41.139	39.559	40.187	41.309	40.989	40.488	41.701	40.351	36.014	39.556	35.813	37.374	36.492	32.721	35.662	41.355	40.257	39.547	34.858	39.485
	40.622	39.278	41.252	41.115	40.686	41.237	39.681	37.929	41.878	40.696	36.201	39.957	37.972	38.265	37.711	36.564	37.305	40.684	39.993	40.086	NaN	38.799
	39.851	37.931	41.818	41.523	40.691	41.628	40.254	40.711	42.169	41.034	37.395	40.033	36.821	37.665	35.496	35.708	38.371	41.939	40.391	38.331	34.652	38.759
	40.193	40.595	42.156	40.382	40.393	41.695	39.793	40.552	42.343	40.125	NaN	40.099	32.571	38.12	35.753	34.087	36.955	40.674	40.133	39.222	36.314	39.404
	41.508	38.102	42.501	40.086	39.098	40.977	39.637	40.03	42.558	40.444	34.357	39.527	34.765	37.472	35.726	34.352	38.165	41.138	40.753	39.434	31.495	39.361
	40.971	37.757	41.747	39.955	40.599	41.836	40.009	40.459	42.589	40.354	37.492	40.414	32.486	37.394	37.387	38.165	37.535	41.464	40.566	39.94	NaN	40.135
	41.385	37.959	42.173	41.167	40.65	42.012	39.41	40.317	42.845	41.061	38.35	40.445	37.464	36.6	36.484	36.891	37.973	41.767	39.836	38.669	33.008	38.505
	41.249	38.21	42.326	40.69	39.925	41.616	39.984	39.679	42.078	40.68	34.26	39.466	37.257	36.383	37.1	36.312	38.361	40.784	40.903	40.331	32.787	39.386
	39.27	39.182	41.218	41.207	40.738	42.028	38.793	39.954	42.358	40.347	35.939	40.023	35.241	37.565	37.285	37.534	38.511	40.916	40.565	38.501	34.261	39.502
	39.94	36.802	42.13	39.849	39.941	40.86	39.759	39.455	42.467	39.771	37.573	40.692	33.426	37.126	37.022	37.142	35.722	41.687	40.445	37.388	NaN	38.79
	36.957	38.61	40.811	39.76	40.893	41.505	40.15	40.987	42.564	39.266	36.49	40.862	NaN	37.62	37.611	35.489	36.981	40.258	40.719	41.227	NaN	40.256
	41.238	36.847	42.448	39.569	40.854	41.916	39.939	41.113	42.234	39.565	34.45	39.016	31.96	36.746	36.839	33.737	35.251	41.653	39.772	40.149	NaN	40.106
	39.225	38.154	42.473	39.889	39.633	41.764	39.952	40.201	NaN	40.672	38.01	39.78	31.982	36.654	38.865	37.228	37.305	41.438	41.312	36.544	34.617	38.08
	39.063	38.706	41.842	37.672	41	41.904	40.515	41.387	41.714	40.588	33.551	40.979	33.293	37.112	36.336	33.476	37.023	41.299	40.659	38.447	NaN	39.359
	39.398	36.938	41.155	40.839	40.379	41.902	39.54	40.957	NaN	40.769	35.038	40.274	35.549	39.057	36.555	36.627	35.54	40.969	39.121	40.925	NaN	39.88
	38.969	39.227	42.166	40.443	39.903	42.561	38.422	40.2	42.22	39.786	37.602	40.052	NaN	36.483	37.67	38.618	38.166	40.728	40.46	40.532	33.904	38.079
	40.808	38.749	41.172	39.989	40.931	41.91	40.004	40.586	42.662	40.081	34.067	40.942	32.925	37.46	35.99	34.424	38.599	42.238	41.911	39.706	NaN	39.025
	39.596	38.111	41.237	39.91	40.495	41.08	39.511	39.81	41.73	39.933	37.467	39.797	NaN	37.643	36.945	35.483	36.995	41.542	39.493	41.044	34.559	36.897
	40.098	37.517	40.488	40.63	40.463	41.427	39.979	41.299	42.69	40.64	36.683	40.349	35.05	38.193	36.57	38.603	35.146	41.445	39.367	40.175	NaN	40.246
	39.075	37.107	40.996	39.899	40.675	41.424	38.685	40.954	42.604	41.006	33.446	40.506	36.368	37.675	36.011	NaN	36.725	40.597	40.747	40.863	NaN	38.526
	39.537	37.658	41.485	39.988	40.485	41.284	39.893	40.338	41.694	41.028	36.696	41.107	34.828	37.362	36.334	36.548	37.491	41.333	41.107	37.753	NaN	39.741
	39.368	39.275	42.287	39.494	39.832	41.725	39.839	40.958	41.946	39.759	38.64	40.227	33.866	36.846	36.23	38.328	36.867	41.505	40.059	39.657	NaN	39.974
	39.963	38.235	41.664	40.74	40.403	41.083	40.109	40.597	41.634	41.094	37.251	40.451	34.987	37.313	35.9	36.98	37.984	40.645	40.313	39.386	NaN	38.547
	39.506	37.807	42.149	40.841	41.324	41.711	39.534	41.205	43.002	41.153	34.416	40.886	35.161	37.395	37.277	37.301	38.449	40.941	40.891	40.006	NaN	38.259
	38.726	38.444	41.464	40.784	41.071	41.254	39.575	39.34	41.83	40.915	36.722	39.568	34.196	37.701	35.542	36.403	35.66	41.648	40.416	36.53	NaN	38.87
	39.527	37.663	41.883	39.814	40.706	41.533	39.794	39.014	42.574	40.251	35.969	40.604	36.091	37.541	36.145	35.22	36.43	41.774	40.467	38.819	NaN	39.807
	38.503	39.227	41.404	39.873	39.615	42.249	40.197	39.419	42.295	39.925	35.878	40.998	35.63	38.082	35.551	37.799	38.296	41.082	40.168	40.646	31.776	38.031
	40.22	38.608	41.843	39.034	40.328	41.352	39.592	39.409	41.501	40.101	36.746	40.222	33.681	38.187	35.907	38.025	37.507	41.257	40.242	39.713	NaN	40.148
	38.169	38.238	40.911	38.909	40.939	41.851	39.899	41.395	42.737	38.458	35.819	39.627	NaN	36.879	35.909	37.73	36.361	41.695	40.029	36.718	NaN	40.288
	39.01	37.713	41.942	40.305	40.908	41.29	40.159	40.771	42.1	40.589	37.415	40.449	37.308	37.63	36.854	36.7	36.395	41.707	40.446	40.426	35.229	38.532
	38.277	38.563	42.44	41.038	41.092	41.422	38.965	40.645	42.404	40.941	35.436	39.243	35.567	37.739	37.927	37.401	34.867	41.697	40.769	39.675	35.157	37.811
	40.351	39.032	41.047	41.177	40.759	42.104	40.206	40.068	42.104	40.733	37.829	39.942	34.331	38.144	38.122	37.688	36.377	40.919	41.488	39.864	NaN	40.061
	40.71	39.583	41.458	40.172	40.88	41.395	39.753	40.491	42.181	39.634	35.749	40.878	37.11	36.996	37.385	37.232	34.545	40.828	40.966	41.085	32.182	39.423
	40.392	37.321	42.208	40.427	39.938	41.8	40.374	39.197	43.057	39.238	36.809	40.565	35.147	37.132	33.911	37.129	35.92	40.718	39.447	39.773	NaN	37.878
	40.488	37.675	42.059	38.016	40.11	41.771	38.769	39.881	42.463	39.852	33.753	39.665	37.962	35.83	37.033	35.502	35.998	41.514	40.595	39.291	NaN	39.826
	39.286	39.082	41.703	40.962	40.987	41.894	39.468	40.014	42.172	40.262	37.199	40.174	37.446	37.252	37.683	37.215	36.297	40.976	40.378	37.926	NaN	38.374
	40.076	37.623	42.022	38.994	40.89	40.987	38.649	40.676	41.827	40.902	35.789	40.046	37.106	37.629	36.518	34.709	36.298	41.51	40.108	34.438	NaN	39.416
	40.592	39.455	41.552	39.413	40.16	41.426	40.409	40.529	42.914	41.194	36.388	40.196	37.608	38.097	36.936	38.305	37.417	40.586	40.986	39.437	NaN	39.067
	40.164	36.628	42.391	39.093	41.032	41.285	40.754	40.033	NaN	40.542	37.682	40.383	37.521	37.293	36.525	37.262	36.866	40.938	40.153	38.443	NaN	39.213
	40.573	38.272	41.879	40.722	39.673	41.919	39.823	39.862	42.779	39.426	38.188	41.09	36.27	36.626	NaN	35.487	37.95	41.966	40.699	38.248	NaN	39.153
	40.4	39.341	41.63	39.374	40.687	42.042	40.094	40.96	42.863	40.804	36.531	40.772	36.716	36.42	36.774	37.427	38.151	40.93	41.199	41.016	33.781	36.65
	39.919	37.157	41.764	39.929	39.617	41.938	40.145	41.106	42.164	40.49	NaN	40.419	34.895	38.764	36.086	32.757	38.849	40.963	40.776	40.46	NaN	39.345
	41.251	38.723	41.108	40.341	40.504	40.245	39.751	40.233	42.179	39.844	32.157	40.05	36.225	38.188	35.073	36.654	39.386	41.33	40.977	39.53	NaN	39.995
	37.687	39.092	41.672	40.037	41.012	40.744	40.58	40.955	42.526	40.839	35.944	40.461	35.053	37.954	35.779	38.343	38.374	41.502	40.985	39.713	NaN	39.859
	40.523	39.317	41.68	41.369	40.153	42.07	39.101	40.476	42.774	39.457	37.843	39.88	36.657	35.706	36.216	36.466	33.135	41.39	41.004	36.128	35.849	38.509
	38.608	38.83	41.662	39.886	41.195	42.179	40.037	39.359	42.71	40.206	36.112	40.97	37.244	38.779	35.569	37.303	35.415	40.403	40.665	40.291	NaN	40.552
	40.866	39.384	41.922	41.016	41.027	41.272	40.637	40.522	42.77	40.508	38.7	40.909	32.672	37.703	34.753	36.29	38.248	40.75	40.774	40.052	NaN	39.689
	40.073	38.372	41.364	40.114	41.432	41.811	39.249	40.777	42.643	40.607	37.563	40.387	36.078	37.798	36.17	38.606	34.642	40.381	40.065	39.7	NaN	40.636
	38.548	38.277	41.881	39.687	40.697	41.609	39.088	40.947	NaN	40.315	32.184	40.59	35.885	37.361	NaN	37.772	36.65	41.408	40.538	36.212	NaN	38.52
	40.298	38.329	41.282	40.661	40.83	41.263	39.418	40.775	42.474	40.212	38.231	40.07	33.354	36.986	36.676	33.124	38.26	39.573	40.81	38.453	34.501	39.83
	39.989	38.467	41.89	39.563	40.467	41.387	40.175	40.619	42.786	39.901	34.638	39.32	37.37	37.866	35.346	35.623	36.403	40.424	40.191	41.112	35.726	39.313
	40.602	38.473	42.003	39.943	40.111	41.528	39.315	40.901	42.801	40.372	36.77	40.269	36.498	36.684	37.814	36.277	38.902	41.553	40.634	39.479	NaN	39.456
	38.482	37.786	42.094	40.085	41.152	42.052	39.289	40.919	41.993	40.284	37.983	40.725	37.214	37.977	37.632	38.056	37.118	41.267	40.401	39.065	NaN	38.577
	37.872	38.912	41.654	39	39.348	41.653	38.575	39.92	42.054	40.612	37.061	40.446	34.628	38.4	NaN	37.82	35.162	41.808	40.444	39.464	NaN	39.37
	39.145	37.715	41.535	38.582	40.92	41.807	40.233	39.933	42.657	39.938	36.625	40.095	34.153	37.114	37.688	36.062	36.185	41.018	40.584	39.572	35.572	38.01
	38.374	38.304	40.422	40.543	39.912	41.741	40.93	40.489	42.904	38.66	38.383	40.007	37.262	38.116	35.297	35.119	36.874	41.439	39.295	39.824	NaN	39.535
	40.405	37.792	41.766	40.578	40.871	41.787	39.986	40.126	41.119	39.77	36.087	39.743	36.44	37.977	37.743	38.162	37.356	41.107	40.529	38.872	NaN	39.348
	40.826	38.486	42.871	38.803	40.617	40.928	40.336	40.832	42.575	40.295	32.768	40.899	36.919	37.827	36.644	36.944	36.238	40.985	39.942	40.812	36.31	39.21
	37.508	37.479	41.489	39.701	40.707	41.721	39.709	40.72	NaN	39.594	35.911	40.412	34.636	36.66	37.227	33.939	38.238	40.328	39.982	38.321	NaN	39.902
	40.303	37.721	40.984	40.722	39.794	41.38	39.702	40.32	41.241	40.535	38.647	39.937	35.915	37.954	37.963	38.769	37.217	41.162	40.083	40.282	NaN	39.308
	39.955	39.361	41.615	41.703	40.754	42.013	39.85	40.522	42.884	40.443	34.133	40.364	33.891	37.807	36.573	35.298	37.356	41.525	40.637	40.548	NaN	40.215
	37.699	39.375	41.853	38.346	40.365	42.471	39.321	39.151	41.66	40.504	34.376	40.679	37.684	37.923	37.524	37.038	38.476	40.07	40.257	40.038	NaN	38.682
	39.274	37.274	41.269	40.365	40.956	42.309	40.279	41.59	42.697	40.441	37.444	40.45	33.498	38.486	38.009	36.896	32.224	40.439	41.023	40.077	NaN	40.253
	40.572	38.146	41.683	40.931	41.289	41.641	40.466	39.112	42.666	40.256	37.132	40.629	35.994	38.485	33.009	33.304	36.099	40.14	39.587	40.498	36.828	39.261
	40.135	39.305	41.575	38.165	40.796	41.382	40.272	39.71	42.571	39.39	37.553	39.693	35.982	38.204	35.482	37.411	37.28	41.791	40.859	38.876	35.127	40.152
	40.304	37.65	40.994	40.794	40.541	41.432	39.651	41.218	41.775	40.946	34.693	40.205	34.854	36.834	37.796	38.088	34.998	41.095	40.676	40.251	32.443	38.346
	39.936	38.637	40.534	38.914	40.496	41.576	40.482	40.275	NaN	40.546	36.911	40.45	36.53	37.589	36.766	36.1	38.266	41.286	39.776	36.42	34.708	38.38
	39.993	38.972	41.519	38.775	40.209	41.149	39.845	40.713	42.724	40.92	37.771	41.015	35.084	37.173	35.547	34.542	38.08	40.631	40.419	38.677	NaN	37.498
	40.183	39.612	41.352	39.608	40.841	41.448	40.029	41.393	42.952	39.331	37.235	40.532	NaN	37.501	37.845	34.963	35.726	41.453	40.977	39.92	34.478	39.943
	40.203	39.559	41.382	40.953	41.489	42.226	38.725	40.406	42.726	41.08	NaN	39.835	32.478	36.576	36.409	34.513	32.363	41.007	40.699	39.903	33.836	38.329
	37.787	39.185	42.158	41.265	40.633	41.427	39.969	40.84	41.904	39.551	34.977	39.515	36.054	38.409	36.075	37.79	38.035	41.007	39.689	39.839	NaN	38.419
	40.454	38.718	40.356	39.242	40.905	42.124	39.898	41.18	42.927	39.949	37.256	40.399	34.505	37.745	36.966	36.587	37.512	40.964	40.824	39.717	NaN	39.002
	40.696	39.623	41.017	40.571	40.885	41.886	39.879	40.35	42	39.685	35.451	41.109	33.924	37.656	36.224	37.131	38.469	41.544	40.397	40.112	NaN	39.046
	39.138	38.294	41.585	38.893	39.646	41.802	39.483	40.383	42.414	39.017	36.497	40.599	35.137	37.587	38.019	33.695	37.326	41.297	39.903	37.406	NaN	38.95
	41.004	38.83	41.924	39.914	40.547	41.142	40.259	39.785	42.057	39.222	37.426	40.203	34.406	36.358	37.588	36.722	37.986	41.359	41.365	40.629	NaN	36.637
	40.267	35.573	41.218	40.071	41.494	41.427	40.043	38.64	42.307	39.276	33.805	40.502	36.373	38.28	37.922	37.571	37.612	40.686	40.121	39.633	NaN	39.089
	40.548	40.149	41.663	38.985	40.804	41.619	39.541	41.848	41.85	39.885	36.597	40.788	35.269	37.572	35.698	37.635	37.423	42.01	40.75	37.03	32.708	38.386
	38.672	38.996	42.08	40.856	39.973	41.742	40.379	39.844	41.073	40.544	37.235	41.299	36.043	37.766	38.436	38.307	37.913	40.832	40.091	39.581	32.756	38.611
	39.675	37.009	40.569	41.307	40.996	41.568	39.188	41.259	40.722	40.229	35.743	40.126	34.702	37.977	37.188	35.935	35.596	41.234	40.489	40.776	31.667	39.584
	39.625	39.742	41.781	40.221	40.761	42.219	39.387	40.623	42.269	40.617	NaN	39.68	37.794	36.264	36.566	38.453	38.191	41.212	41.153	39.94	34.059	40.29
	41.204	38.324	41.375	39.55	39.873	41.496	39.778	40.957	42.666	40.474	37.438	40.899	33.845	37.402	38.561	35.414	37.585	40.766	40.563	39.534	36.14	38.989
	39.56	36.477	42.042	39.711	40.285	41.724	40.305	40.873	41.949	40.855	37.425	39.786	36.594	37.683	33.293	34.612	39.1	41.36	40.552	39.104	NaN	38.976
	39.299	39.201	41.827	41.059	40.608	42.093	40.388	40.859	42.854	40.367	35.735	40.764	34.948	38.034	37.738	37.668	37.666	41.145	40.492	38.32	NaN	39.224
	40.252	39.189	41.834	39.712	41.194	41.493	39.722	41.236	42.562	40.287	36.627	40.121	35.648	37.31	35.434	37.547	37.691	41.107	40.688	39.674	32.799	37.352
	39.717	37.024	40.266	41.058	40.518	41.2	40.051	39.976	42.09	39.697	36.986	40.779	36.099	37.575	33.644	33.606	36.056	40.425	40.725	40.128	NaN	39.058
	38.949	36.815	41.626	40.038	39.546	41.736	40.188	39.055	42.794	40.233	37.085	40.446	37.159	36.963	34.979	33.821	38.203	41.113	40.386	38.623	36.18	39.58
	40.723	39.712	41.127	40.198	40.121	41.511	40.199	39.803	42.302	39.015	37.965	40.324	33.726	37.474	36.297	37.964	38.712	41.088	40.056	37.606	33.463	39.593
	39.307	38.038	41.383	40.168	40.326	41.849	39.369	39.279	NaN	41.279	35.145	40	36.843	37.611	35.479	38.149	38.182	40.435	41.168	39.716	NaN	39.109
	38.792	39.075	40.8	40.656	40.444	41.386	40.455	40.994	42.43	40.114	35.614	40.797	34.688	38.139	36.746	34.894	35.747	40.783	41.335	40.493	36.501	36.956
	38.731	38.148	40.267	39.002	39.758	40.668	39.641	40.435	NaN	39.409	37.776	40.785	36.782	36.606	35.319	35.098	35.924	39.929	41.175	37.467	NaN	39.808
	41.022	39.449	41.362	40.714	39.803	41.968	40.024	41.227	42.312	40.368	38.098	41.16	36.999	37.12	38.43	36.511	38.024	41.204	41.285	40.14	33.072	39.885
	40.736	39.042	41.875	39.873	39.865	41.118	38.3	41.172	42.708	39.716	36.055	40.935	35.011	37.824	33.651	36.943	38.889	41.076	40.769	36.231	NaN	38.898
	41.112	39.024	41.774	40.864	40.321	41.808	40.002	38.297	41.668	40.693	38.881	40.267	35.339	37.681	36.481	37.804	36.427	41.043	40.95	40.749	34.341	40.617
	40.884	39.625	41.884	39.655	39.749	40.93	40.19	40.173	41.787	39.099	37.028	40.629	35.456	37.659	37.437	34.073	36.373	41.675	40.126	40.52	NaN	40.396
	39.922	38.847	41.443	38.614	40.547	41.804	39.602	39.99	NaN	41.317	36.032	40.701	NaN	36.597	37.173	37.389	34.451	41.645	40.741	40.449	33.036	38.585
	39.456	37.854	40.596	40.583	40.846	41.505	38.233	40.782	42.787	40.106	37.023	40.619	37.241	37.327	37.414	37.844	34.195	41.628	40.744	39.317	34.555	39.3
	38.945	38.179	42.098	38.783	41.255	41.424	38.47	40.054	NaN	40.16	35.917	39.354	35.507	37.69	35.346	34.824	37.691	40.712	40.637	39.918	NaN	38.379
	40.708	37.428	41.072	40.667	40.299	40.419	39.754	40.159	NaN	39.272	35.337	40.451	36.099	36.428	36.931	37.056	36.703	41.829	40.019	39.546	NaN	39.614
	39.67	38.566	41.6	40.295	40.644	41.38	40.109	38.514	NaN	40.705	33.897	40.188	35.897	37.636	37.78	37.798	37.412	40.723	39.399	39.926	35.778	40.621
	38.9	38.278	40.967	36.617	39.693	41.761	39.655	40.416	42.123	40.48	36.711	40.47	34.471	37.041	36.595	37.33	36.887	40.355	39.929	40.307	NaN	39.168
	40.357	39.613	41.922	38.875	40.828	41.359	40.403	39.391	42.388	40.825	36.402	40.801	34.225	38.119	37.756	36.131	38.676	41.105	40.608	39.485	NaN	39.569
	39.258	39.173	42.258	40.09	39.848	41.786	40.178	41.513	41.98	40.982	35.492	40.177	33.861	36.703	37.128	35.691	36.906	41.222	40.659	39.308	35.025	39.904
	39.375	38.035	41.964	39.363	40.648	41.99	39.237	40.775	41.747	39.805	37.139	40.041	36.396	37.966	34.533	35.218	35.246	40.921	40.227	38.697	NaN	40.307
	40.818	39.259	41.61	41.202	40.072	41.793	40.001	40.962	42.8	39.689	36.486	40.549	33.852	37.723	38.04	34.769	36.353	41.727	39.618	38.667	32.873	38.151
	36.056	38.75	41.726	40.79	40.433	42.489	40.652	41.143	41.426	39.333	37.209	40.432	34.108	37.698	36.703	37.14	38.481	41.215	39.499	40.09	NaN	39.487
	41.089	38.615	42.239	41.53	41.266	42.199	39.941	40.596	42.811	40.471	37.61	40.861	35.63	37.694	37.075	37.515	37.022	41.961	40.401	39.387	35.415	39.473
	40.689	37.203	41.987	40.097	41.228	41.361	40.71	40.075	NaN	39.412	39.011	40.612	36.436	35.917	37.343	37.38	38.182	41.754	40.013	38.621	35.129	39.471
	40.48	37.455	41.766	40.719	41.03	40.942	40.212	40.213	42.04	40.003	36.197	41.437	36.955	37.153	35.45	38.312	34.856	41.49	40.828	40.013	NaN	39.436
	39.006	37.555	40.27	40.126	40.892	41.738	39.394	41.026	42.781	40.14	36.477	39.912	35.649	36.383	36.729	37.479	31.632	41.014	41.58	40.856	34.133	39.534
	39.839	39.646	41.309	40.446	39.553	41.399	39.099	41.087	42.37	40.063	31.883	39.013	38.801	37.791	37.211	36.323	34.358	40.916	41.138	37.985	32.237	40.142
	38.836	39.12	41.102	40.21	40.393	41.55	40.223	40.59	42.819	39.744	35.627	40.413	35.625	37.07	38.369	36.929	37.077	41.168	40.123	40.134	36.785	39.597
	38.754	38.769	41.717	40.37	40.665	41.365	38.615	39.67	41.624	40.854	36.038	39.682	35.948	38.539	37.779	37.313	38.096	40.52	39.709	40.692	NaN	38.987
	39.036	38.616	41.557	40.643	40.302	41.392	39.994	41.235	41.949	39.796	36.361	40.088	34.963	37.739	37.59	38.859	38.416	40.629	40.895	38.492	NaN	37.176
	38.865	39.359	41.823	40.897	40.828	41.889	40.852	39.929	42.392	40.655	33.738	40.635	34.703	37.257	36.813	37.128	35.335	41.096	40.829	40.189	NaN	38.577
	38.633	37.093	41.323	41.18	40.127	41.184	39.883	40.903	42.655	39.776	37.684	40.749	35.436	36.674	37.175	35.142	37.214	41.703	40.669	37.471	34.203	39.787
	37.991	38.816	41.323	40.694	40.198	41.394	39.054	40.492	42.608	38.977	37.445	39.314	38.086	36.876	33.289	37.727	37.334	40.859	40.63	38.579	36.228	38.195
	40.137	39.611	42.69	39.959	41.087	42.243	39.547	40.211	42.822	40.532	37.302	40.166	37.302	37.752	37.181	36.416	38.416	40.971	40.888	38.489	NaN	39.382
	37.465	37.791	41.969	40.046	39.982	41.685	39.688	40.151	42.271	39.893	36.691	39.43	36.555	37.24	32.329	37.623	36.981	41.959	40.657	39.91	NaN	40.287
	40.876	38.498	41.703	40.041	40.457	41.981	38.672	40.226	NaN	39.213	37.433	40.461	36.292	36.686	38.432	NaN	32.967	41.319	40.845	39.314	34.354	38.441
	39.199	38.675	41.686	40.59	40.386	41.034	40.044	40.004	42.39	40.663	NaN	41.482	34.58	38.68	NaN	37.647	37.536	41.065	40.806	39.845	NaN	40.522
	41.227	38.581	41.964	39.815	40.111	41.729	39.373	39.802	42.942	40.279	37.547	39.887	36.582	36.496	36.756	37.62	37.863	40.969	41.163	39.136	NaN	40.186
	38.273	38.49	42.165	40.931	40.71	40.41	40.38	40.632	42.008	40.447	34.276	40.362	35.624	36.269	37.324	36.599	38.237	41.099	41.359	39.273	NaN	40.358
	36.492	38.383	41.386	39.24	40.343	41.723	39.218	35.577	42.595	40.319	37.325	40.197	37.041	36.382	37.556	37.247	33.898	41.367	40.563	39.132	NaN	39.176
	39.108	38.804	42.003	40.649	40.441	41.791	40.008	41.285	41.922	39.859	36.384	40.605	36.189	36.803	36.461	36.95	37.814	41.2	40.518	39.042	31.48	39.422
	40.616	37.591	42.159	40.524	40.437	42.008	39.808	39.836	NaN	39.791	36.823	39.906	36.697	38.203	38.179	37.451	36.53	41.212	40.704	41.001	36.638	39.061
	39.865	37.069	41.18	38.545	40.644	41.446	40.367	39.782	41.512	40.662	36.863	40.313	36.205	36.819	34.791	37.8	38.314	40.551	40.086	37.715	NaN	39.514
	39.643	38.695	41.584	40.16	40.816	41.201	39.885	39.746	41.672	40.363	35.743	41.418	36.35	37.525	34.868	35.859	37.918	41.624	40.836	38.438	NaN	39.487
	38.886	37.634	41.659	39.3	40.167	42.183	39.736	40.777	42.261	37.985	38.548	40.694	37.172	36.866	35.729	36.121	35.458	41.862	40.174	40.08	NaN	39.572
	41.149	39.343	41.891	39.854	41.055	41.488	39.317	40.718	42.463	40.703	37.4	40.456	NaN	37.336	35.859	36.01	37.642	41.86	40.727	37.111	33.9	39.89
	39.55	39.174	41.679	39.976	41.184	42.075	38.93	41.026	42.738	40.036	35.829	40.328	33.106	36.698	36.937	37.265	37.22	41.228	40.434	40.158	NaN	38.798
	38.997	38.56	41.64	39.859	41.415	42.09	39.196	40.372	42.006	39.995	36.523	40.645	37.66	36.739	37.672	30.755	37.835	41.322	40.141	40.652	31.131	39.538
	36.697	39.757	42.007	41.225	40.399	41.77	39.851	39.544	42.838	40.37	37.222	40.484	35.432	38.141	36.817	36.585	37.642	41.662	40.363	40.182	35.188	38.472
	39.097	39.252	41.676	39.874	39.989	41.284	39.26	39.659	41.656	40.048	38.535	39.963	33.669	37.014	36.904	34.736	36.045	41.656	40.316	39.74	NaN	39.816
	40.187	40.11	41.551	40.285	40.402	41.211	40.393	40.304	40.99	40.946	36.937	40.557	34.819	37.32	37.704	38.055	38.683	41.496	41.263	39.518	NaN	40.319
	38.164	38.285	42.012	39.589	40.186	40.848	39.849	40.609	42.566	40.347	36.755	40.598	36.612	37.278	33.791	35.437	38.134	41.231	40.611	38.208	34.084	36.833
	38.685	39.243	41.761	39.574	41.012	41.489	40.609	41.476	42.094	40.389	33.845	39.61	36.398	37.554	36.509	37.345	36.304	40.263	40.687	40.251	NaN	37.342
	41.526	38.254	42.053	40.751	40.486	41.921	39.636	40.267	41.659	40.097	37.355	40.657	36.265	36.865	34.108	36.607	36.521	40.794	39.546	40.21	NaN	39.426
	40.602	38.916	41.791	40.314	40.328	41.652	39.418	40.522	41.282	39.71	34.12	40.529	32.974	37.416	36.127	36.888	37.19	41.663	41.105	39.249	NaN	39.707
	38.911	37.693	42.08	40.527	40.53	41.882	40.342	40.978	42.272	40.226	38.365	40.203	34.929	37.865	36.246	34.327	37.434	40.874	39.892	40.612	31.911	39.249
	38.841	38.649	41.318	40.439	40.21	40.824	39.905	39.709	41.977	40.714	33.284	40.32	37.544	37.319	35.688	36.542	37.045	41.078	40.341	39.515	33.085	39.369
	41.373	39.746	42.474	41.118	39.873	41.011	39.697	38.885	41.618	40.198	NaN	40.862	34.14	37.1	36.691	37.138	38.156	40.898	40.461	40.352	34.162	40.308
	39.953	38.811	41.974	39.581	41.151	42.3	39.815	41.208	42.124	40.791	35.395	40.122	36.999	38.387	38.095	36.179	39.065	40.692	40.659	38.069	NaN	39.963
	40.436	37.881	40.215	39.986	39.996	41.718	39.442	40.292	42.006	40.557	34.476	39.243	35.545	37.816	37.634	36.676	36.727	42.025	40.803	38.175	NaN	38.096
	41.126	38.215	42.257	40.111	39.62	41.488	38.826	40.84	42.647	40.827	37.458	40.322	31.314	36.83	37.086	35.956	38.118	40.507	40.916	38.057	35.267	39.876
	40.23	36.721	42.026	40.532	40.738	41.483	40.165	41.256	42.141	39.611	35.787	40.881	33.815	37.779	37.178	36.554	35.5	40.732	40.062	39.018	33.59	38.548
	39.672	38.078	41.124	39.468	39.603	41.376	40.01	39.444	42.886	40.608	36.287	40.273	35.88	37.266	36.71	33.605	37.698	41.711	39.327	40.361	NaN	39.418
	38.308	39.069	41.792	39.779	41.206	41.956	39.613	40.99	43.004	40.715	36.712	40.385	36.216	37.288	37.339	37.824	38.194	41.096	40.857	39.298	NaN	39.009
	39.029	39.149	41.922	40.913	40.624	41.527	39.274	40.408	42.158	39.57	34.52	40.243	34.03	37.081	35.882	36.075	34.486	41.48	40.105	40.545	31.735	38.633
	40.381	37.273	41.939	41.035	40.081	42.152	39.001	41.087	42.357	41.366	38.47	40.379	36.327	37.298	32.665	35.898	37.414	41.35	41.199	39.184	34.536	39.733
	38.551	40.031	42.178	41.135	40.423	41.178	39.886	40.924	42.145	40.414	36.185	39.956	37.712	36.3	34.801	35.932	35.635	40.713	40.622	39.927	NaN	40.679
	39.143	39.092	41.374	39.446	40.4	41.533	39.966	40.64	42.674	40.274	34.325	40.147	NaN	37.812	36.379	37.208	37.729	40.94	40.783	39.922	NaN	38.71
	39.604	39.767	41.22	40.208	41.281	41.599	40.628	40.038	42.433	40.774	34.611	40.4	36.405	36.379	36.563	37.948	39.15	41.861	40.601	41.174	NaN	39.636
	39.804	39.155	41.579	40.347	40.69	40.44	40.269	40.844	43.014	39.632	37.572	41.194	31.744	37.126	35.289	36.888	38.101	40.985	41.015	39.867	NaN	39.332
	39.044	38.601	41.271	39.947	40.5	41.312	39.727	40.568	42.556	39.946	35.911	40.453	37.259	38.585	34.555	NaN	NaN	41.667	40.549	38.274	NaN	39.37
	35.74	38.112	40.84	40.466	40.464	40.105	39.815	39.891	42.781	39.898	38.65	40.648	32.918	37.274	38.002	37.608	38.441	41.517	40.374	37.883	NaN	38.956
	39.936	38.681	41.293	39.856	40.139	42.216	39.81	40.799	42.631	40.054	36.143	40.502	36.367	37.262	36.568	35.21	37.68	41.975	39.423	31.998	NaN	39.243
	40.025	39.045	41.392	39.779	40.903	41.424	39.396	40.72	42.8	40.317	35.183	40.592	36.446	38.487	34.233	37.819	39.136	41.056	39.882	39.526	34.084	39.693
	37.817	37.346	41.24	40.665	40.587	40.779	40.01	40.302	42.867	40.581	35.264	40.811	35.826	37.384	37.86	37.524	36.378	40.469	40.832	39.167	NaN	38.47
	39.664	37.878	41.439	39.954	40.72	41.575	40.065	39.981	41.221	40.177	36.768	39.977	36.018	37.103	36.942	37.542	33.604	41.154	40.085	39.315	NaN	36.735
	41.12	36.25	41.3	40.016	41.257	41.032	38.385	41.006	NaN	40.501	34.652	40.175	36.609	37.765	38.466	37.162	NaN	41.158	40.775	37.599	33.052	38.173
	39.901	39.739	41.809	39.582	39.624	41.595	39.597	39.903	42.553	40.57	35.306	40.848	37.125	36.909	35.087	32.831	38.094	39.811	40.762	39.277	NaN	40.45
	38.75	38.947	41.962	40.954	40.855	41.996	39.43	39.02	42.051	39.737	36.3	40.445	36.735	37.916	38.131	36.198	37.542	40.981	39.76	39.211	36.627	40.643
	39.066	38.586	41.099	40.812	41.028	41.593	38.947	40.705	42.581	39.998	38.412	40.723	37.763	38.903	35.781	37.612	37.177	41.642	40.406	40.178	NaN	39.83
	39.813	39.666	41.219	39.455	40.522	41.343	40.109	41.095	42.959	39.713	32.78	40.874	35.7	37.972	33.727	37.105	36.219	41.701	39.877	38.406	31.625	38.747
	39.039	38.635	42.343	41.372	40.099	41.465	39.902	41.046	42.608	40.507	37.786	40.511	37.063	36.07	37.938	NaN	37.707	40.909	40.744	39.272	32.91	37.977
	40.928	38.522	41.242	40.49	40.476	41.904	40.314	40.039	42.004	40.764	36.584	39.983	36.198	37.961	37.658	37.135	36.195	41.311	40.415	39.411	NaN	39.372
	37.998	40.231	41.05	41.152	40.66	42.061	39.862	40.668	42.124	40.621	37.187	39.978	35.624	36.889	38.194	37.003	37.634	42.12	39.888	40.062	NaN	38.88
	38.636	38.338	41.84	40.197	40.072	41.286	39.708	39.808	41.189	39.947	37.786	40.39	37.34	37.805	36.941	37.826	34.033	41.69	40.738	39.476	36.703	39.543
	40.825	39.399	41.754	40.279	40.876	40.638	40.069	40.505	41.574	41.564	36.329	40.6	33.745	37.362	37.906	34.58	37.931	40.976	40.613	40.583	35.492	39.383
	40.289	39.331	41.475	40.722	40.101	41.715	40.402	39.941	42.424	40.303	36.883	41.351	36.48	38.697	38.132	37.646	35.573	41.292	40.426	39.716	NaN	36.912
	39.814	37.325	41.719	40.422	40.547	42.071	38.749	39.457	41.153	39.595	37.46	40.074	33.911	37.205	35.965	35.055	34.963	41.236	41.259	38.399	NaN	38.746
	40.498	39.456	41.097	40.077	40.895	42.01	38.817	40.473	42.132	39.66	36.277	40.597	37.165	37.192	36.313	37.927	36.456	41.345	40.05	38.439	33.174	39.284
	40.79	37.678	41.438	40.59	41.034	41.648	39.368	40.67	42.575	40.102	37.206	40.032	35.498	37.02	36.162	35.759	38.683	40.23	39.809	40.837	NaN	39.123
	39.31	38.642	41.611	40.002	41.113	41.493	40.08	40.83	42.011	40.553	37.955	40.507	37.224	37.534	36.966	37.046	38.831	41.653	40.209	39.53	34.298	40.774
	39.733	40.08	41.674	40.79	40.521	41.157	39.759	40.544	42.271	40.534	35.683	40.692	36.725	37.323	35.949	36.257	35.13	40.795	39.879	39.683	NaN	37.871
	38.729	38.03	40.419	41.115	40.999	41.768	39.514	40.744	42.837	40.507	36.739	40.607	34.747	38.363	36.791	36.731	38.052	41.029	39.217	37.853	NaN	38.951
	40.446	38.902	41.902	39.449	40.638	41.41	40.003	39.889	42.123	40.802	37.094	39.807	37.275	38.015	35.838	38.551	35.664	40.132	40.843	36.225	NaN	37.363
	41.363	38.058	42.237	40.591	40.522	41.641	40.112	40.411	NaN	40.661	34.272	40.382	36.372	37.014	36.018	35.493	37.965	40.809	40.712	39.515	35.902	39.344
	39.546	40.299	42.1	40.565	40.543	41.643	40.089	40.674	42.244	39.55	35.591	39.759	37.684	37.063	33.997	37.94	37.509	41.47	41.311	38.007	NaN	39.602
	40.331	39.644	40.577	38.331	41.254	41.666	39.596	40.227	41.901	38.391	36.935	40.445	36.313	38.594	35.935	34.747	37.817	41.412	39.697	38.703	NaN	40.141
	41.134	35.228	41.711	40.815	40.133	41.652	40.268	41.017	41.879	39.543	35.004	40.68	37.781	36.896	37.617	37.813	36.65	40.636	40.668	39.148	32.047	37.66
	38.898	36.513	41.862	40.971	39.993	41.391	39.295	39.332	42.227	40.101	34.137	38.976	33.664	37.341	36.442	37.218	36.208	40.639	39.961	39.916	NaN	39.759
	39.186	38.484	40.783	38.994	40.52	41.536	39.501	40.159	41.414	40.719	36.194	40.516	33.372	37.265	37.857	38.108	38.521	40.922	40.048	40.579	34.535	39.937
	40.572	38.055	41.263	41.459	40.601	40.767	40.119	40.286	42.8	39.165	36.005	39.556	35.961	37.019	34.576	37.577	38.381	41.167	39.786	39.042	35.866	38.082
	37.63	39.36	41.714	39.988	40.252	42.386	38.847	40.842	42.141	39.001	33.279	40.087	35.565	38.542	36.973	36.926	34.921	41.456	41.195	40.363	31.761	39.52
	40.585	37.348	41.45	41.076	39.846	42.151	40.235	39.562	42.269	39.408	33.822	40.585	34.849	38.681	35.921	34.819	36.131	40.621	41.835	39.6	NaN	38.817
	38.652	38.611	41.675	41.353	40.399	41.313	40.625	39.978	42.379	40.032	34.434	39.641	36.324	35.715	37.379	38.11	36.601	40.894	40.75	40.625	34.066	38.789
	39.714	38.197	40.856	40.705	41.158	41.426	39.741	41.107	42.922	39.44	35.963	40.34	37.64	36.514	36.752	34.084	37.755	40.951	40.535	40.74	35.868	38.324
	37.746	40.227	41.163	37.22	40.196	41.885	39.636	38.744	42.204	40.673	32.409	40.578	35.309	38.094	37.849	36.658	36.983	41.248	39.89	39.546	NaN	38.161
	39.487	38.596	41.464	40.622	40.917	41.907	38.86	40.663	NaN	40.62	37.463	41.018	37.409	36.174	36.952	34.418	38.75	39.751	40.645	40.223	NaN	37.834
	40.627	40.261	41.645	39.699	41.151	40.885	39.86	40.218	41.931	40.066	37.271	40.551	32.959	38.133	37.564	36.588	38.631	41.416	40.042	39.358	NaN	40.476
	39.637	37.593	41.816	40.689	40.577	41.939	38.373	38.942	41.601	39.24	35.278	40.498	32.794	37.503	37.773	34.438	38.034	41.25	40.312	40.796	NaN	40.378
	39.702	39.109	41.756	39.828	39.952	40.932	39.947	41.32	42.129	40.975	37.353	39.318	36.537	36.314	37.243	34.848	39.247	41.246	40.417	35.665	36.624	39.434
	40.086	38.698	42.024	40.098	40.604	42.21	39.545	40.176	NaN	40.455	37.834	40.105	NaN	37.773	36.055	36.65	35.455	40.763	40.693	39.498	NaN	39.097
	40.12	38.694	42.009	39.094	40.261	41.729	40.292	40.199	43.006	40.808	33.892	39.243	NaN	38.365	35.714	33.282	35.319	41.347	39.767	40.229	36.878	40.494
	40.528	38.608	41.674	39.243	40.897	42.122	39.466	40.881	42.413	40.722	NaN	40.91	36.619	38.209	37.783	37.09	37.667	41.159	40.021	40.196	NaN	39.527
	40.008	40.101	41.532	39.163	39.572	41.77	40.102	38.411	41.912	40.543	35.347	40.19	37.312	37.332	38.447	38.06	36.58	41.248	39.841	39.776	NaN	37.151
	38.888	38.875	41.791	40.35	40.073	41.901	39.685	40.852	41.401	40.845	37.655	39.54	37.193	37.9	35.385	34.902	38.805	41.551	40.778	41.033	NaN	39.407
	38.437	36.68	41.444	40.222	39.641	41.697	39.46	40.804	42.013	40.029	35.208	40.475	35.832	37.769	37.352	36.679	37.305	41.184	39.758	37.595	35.038	40.325
	39.852	39.439	41.75	40.24	40.565	41.939	39.688	39.827	42.7	40.962	36.895	39.229	33.981	37.172	38.007	36.006	38.475	40.747	39.998	38.538	36.921	40.01
	40.279	38.787	40.784	39.685	40.419	41.332	39.899	40.439	41.393	40.491	35.916	40.263	36.395	37.263	37.622	36.651	38.372	41.209	40.994	40.282	34.965	39.519
	41.578	37.375	41.861	40.853	41.134	41.674	38.955	39.623	42.391	39.745	36.504	39.471	36.756	37.837	36.439	37.623	37.175	41.669	40.359	37.659	NaN	40.393
	39.129	37.96	41.731	39.203	40.463	41.289	40.38	41.096	41.48	40.798	36.038	39.827	36.707	37.056	37.839	36.378	38.112	40.689	40.514	39.408	NaN	39.514
	40.597	38.738	41.899	40.742	40.075	41.182	39.777	41.428	41.603	40.399	36.073	40.336	35.253	37.83	37.623	33.235	34.741	41.337	40.483	39.272	35.041	37.92
	38.448	39.944	41.294	39.213	39.948	41.458	39.954	39.339	41.037	40.492	36.867	39.949	NaN	36.625	35.016	38.381	38.617	40.948	40.434	40.01	NaN	39.626
	40.296	38.72	40.876	40.518	40.419	41.343	39.638	40.747	41.937	40.48	36.158	39.411	33.729	37.376	37.611	36.376	35.597	41.19	40.714	41.156	NaN	39.998
	39.128	36.619	41.898	39.513	40.291	41.853	39.984	40.029	41.133	40.16	37.916	40.569	35.991	37.475	37.701	36.979	37.507	40.209	40.649	39.121	35.459	38.689
	40.906	37.448	40.838	40.034	40.964	41.165	40.37	39.954	41.677	40.286	NaN	40.72	36.554	37.276	34.848	34.01	37.705	40.771	39.806	40.9	NaN	38.861
	38.611	40.157	40.908	40.292	40.679	41.838	40.24	39.584	43.04	40.002	37.17	40.515	31.533	37.183	38.492	33.449	36.072	40.205	40.178	38.686	31.523	38.544
	40.054	38.268	41.252	39.303	40.599	41.997	39.059	40.015	NaN	39.197	36.765	40.02	NaN	37.649	36.191	33.95	37.738	40.572	40.363	40.786	34.012	39.933
	40.16	38.653	42.302	41.477	40.576	41.794	40.123	40.768	42.314	39.445	35.321	40.657	34.653	38.346	36.411	37.182	38.44	40.731	40.828	39.965	NaN	39.863
	38.833	38.797	42.472	38.963	40.854	40.954	40.402	40.574	41.92	40.986	33.118	41.3	36.606	36.513	36.026	36.176	33.613	40.752	39.826	40.163	34.269	38.894
	39.025	39.235	41.835	41.226	40.983	41.474	39.4	39.218	42.155	40.101	37.338	40.173	33.732	38.332	37.446	36.975	34.365	40.669	39.924	39.745	NaN	38.391
	39.942	38.66	40.658	40.282	40.868	41.553	40.325	40.623	42.964	40.109	36.319	39.542	35.887	37.865	37.061	36.128	38.733	41.465	40.291	40.781	33.756	39.391
	34.173	38.574	41.286	38.64	40.205	41.654	39.725	41.762	42.381	40.906	34.43	40.392	36.553	37.106	34.904	37.812	39.58	41.613	40.408	39.629	31.638	40.141
	39.638	37.068	41.29	38.54	39.994	41.552	39.853	40.891	42.079	40.588	36.375	41.247	36.544	37.589	36.604	38.44	32.591	40.924	40.441	39.876	33.153	38.53
	39.182	39.614	41.255	40.221	40.689	42.018	40.239	41.052	41.541	40.255	32.889	40.822	36.339	36.791	37.378	37.146	38.229	40.659	39.771	40.201	37.513	39.424
	40.222	39.675	42.163	39.761	39.711	41.702	40.256	40.624	42.11	40.327	36.968	40.439	38.016	36.514	36.957	36.06	37.074	40.617	39.469	38.047	NaN	37.396
	41.125	40.087	40.833	41.146	40.115	41.813	39.923	39.712	41.834	40.039	33.267	41.469	36.857	36.621	37.381	38.311	37.023	41.579	40.686	39.919	NaN	40.219
	40.861	38.61	41.25	40.361	41.234	42.126	39.748	40.619	42.276	39.615	36.083	41.271	37.382	37.801	36.399	37.325	36.135	41.969	40.864	39.918	NaN	39.14
	40.785	39.348	41.158	40.692	40.478	41.621	40.438	40.619	42.478	39.898	37.665	40.918	34.617	37.913	34.964	33.083	37.762	41.518	40.026	39.546	33.56	38.7
	40.284	37.449	41.376	39.931	40.108	40.869	39.944	38.658	41.784	40.183	34.035	40.789	NaN	37.558	35.885	35.594	37.79	41.419	40.054	40.027	NaN	40.125
	40.399	39.851	41.183	39.33	40.225	41.736	39.129	40.175	42.557	40.659	35.927	40.768	NaN	37.342	36.198	38.372	36.698	41.277	41.249	38.798	33.507	39.07
	40.366	37.044	41.9	39.952	39.944	41.595	40.262	40.281	41.87	40.637	37.354	40.439	NaN	38.205	35.131	36.054	37.417	40.96	39.937	39.878	32.071	40.131
	38.472	39.059	42.213	40.413	40.995	41.841	40.57	39.738	42.619	38.837	36.249	39.946	35.006	37.363	37.686	35.22	38.204	40.772	40.317	38.166	NaN	38.499
	41.523	38.09	41.1	39.365	40.738	41.418	39.862	40.47	41.455	39.994	37.232	40.352	35.355	38.438	36.158	38.302	34.331	40.633	41.03	40.241	37.762	37.998
	40.835	36.196	41.36	39.62	39.659	42.08	40.47	40.886	40.686	40.15	38.692	40.587	36.137	37.321	34.167	36.459	37.862	41.316	40.669	38.255	NaN	39.451
	40.897	38.334	41.595	40.296	40.476	41.183	39.666	39.891	NaN	39.965	38.828	40.248	36.409	37.244	36.599	36.775	38.487	41.733	40.466	38.817	33.932	37.92
	38.413	39.255	40.995	39.88	41.033	41.118	40.46	40.575	42.431	40.94	35.053	40.086	34.717	37.839	36.094	36.495	37.017	40.199	40.018	40.365	NaN	40.348
	40.934	39.079	41.719	40.571	41.069	42.111	39.121	40.576	42.593	38.801	37.724	39.776	32.457	37.841	37.831	36.835	37.925	40.438	39.606	39.189	NaN	37.695
	40.364	39.313	41.699	41.304	41.154	41.914	40.235	40.042	42.571	40.593	35.952	40.902	37.064	36.719	35.589	37.285	37.337	40.686	40.543	40.028	NaN	38.797
	40.917	38.205	40.099	41.385	39.97	42.198	39.567	41.13	42.37	38.708	35.509	40.318	37.206	37.544	35.232	36.881	36.473	41.368	39.653	38.996	33.95	39.73
	38.915	39.325	41.886	40.28	39.684	41.384	39.083	39.897	NaN	40.835	37.363	39.916	34.715	38.498	37.827	37.413	35.199	40.964	40.205	38.827	32.324	39.186
	40.786	39.37	42.112	40.675	40.531	41.56	40.502	40.74	41.998	40.244	35.596	40.913	33.149	37.581	36.082	35.654	38.894	41.591	40.139	37.435	34.737	39.595
	39.732	39.305	42.229	39.013	40.729	41.822	39.558	39.764	41.455	40.35	34.69	40.747	34.564	36.283	37.671	37.389	37.347	41.321	40.405	40.177	NaN	38.459
	38.769	37.951	41.183	40.75	40.777	41.005	39.781	39.913	42.518	39.86	36.898	40.906	38.448	36.72	37.014	37.712	38.264	40.594	40.227	40.31	NaN	37.976
	38.694	38.199	41.821	40.256	40.904	41.671	40.289	40.767	42.15	40.831	37.713	41.118	33.062	37.576	37.237	33.678	37.548	41.285	39.989	38.023	NaN	37.752
	39.437	37.725	41.52	38.504	40.213	42.197	40.253	41.182	42.663	40.498	38.353	40.37	33.6	37.54	36.771	38.401	35.373	41.346	40.634	38.427	33.965	39.438
	41.409	38.07	41.386	39.289	39.736	42.248	39.823	40.579	42.291	40.421	38.4	40.39	36.284	36.05	36.717	37.411	37.513	40.5	39.805	39.394	32.022	39.746
	41.226	36.794	40.553	39.04	40.214	41.305	39.745	39.226	41.588	40.701	36.651	40.759	35.357	37.365	37.221	37.538	37.417	41.225	40.142	41.152	34.733	39.486
	40.402	38.947	42.187	40.036	40.756	41.543	40.09	41.109	41.897	38.622	34.778	40.425	31.524	37.607	34.845	35.197	37.349	41.355	40.631	40.877	NaN	40.358
	41.34	39.208	41.3	40.521	40.697	41.023	40.097	40.527	42.246	40.736	37.558	40.772	36.76	38.566	36.534	35.143	34.6	41.65	40.727	37.626	NaN	39.101
	39.578	39.148	42.08	40.473	40.445	40.381	39.231	41.018	42.988	40.34	36.871	40.132	34.091	37.924	35.869	37.617	35.893	41.306	40.801	40.047	NaN	36.451
	38.823	38.693	42.192	39.715	40.637	42.065	40.164	41.466	42.017	40.261	37.692	39.063	37.61	37.322	36.084	37.092	37.13	41.386	40.346	38.422	NaN	39.111
	38.805	38.479	41.403	39.982	39.838	41.587	39.757	40.648	42.535	40.26	36.764	40.848	37.306	36.859	36.787	36.685	36.879	41.121	40.975	35.019	34.467	39.44
	39.486	38.537	40.921	40.694	40.745	42.056	39.402	41.381	41.964	39.9	36.997	40.526	33.001	36.804	37.732	32.217	36.319	41.107	41.088	40.506	33.559	37.462
	39.378	38.94	40.984	40.101	41.021	41.9	40.269	39.981	41.79	41.123	35.919	39.34	NaN	37.383	37.351	34.715	35.117	40.454	40.272	40.968	35.2	37.507
	40.386	38.252	41.691	40.157	40.715	41.64	39.766	40.984	NaN	40.089	35.377	41.31	35.025	38.502	34.332	37.052	32.424	40.622	40.166	40.703	NaN	39.002
	39.499	40.333	40.967	39.265	39.796	40.854	40.595	39.507	42.728	39.731	35.999	40.498	36.846	36.509	36.223	37.89	38.781	41.206	40.502	38.95	31.911	39.265
	40.674	39.883	41.375	37.985	41.172	41.039	39.848	40.558	NaN	41.12	37.233	40.485	36.541	37.247	38.239	35.722	32.784	40.246	40.793	41.552	35.712	40.314
	36.961	36.731	40.837	39.805	41.03	42.658	40.284	39.884	42.027	39.67	38.135	39.8	35.637	37.869	35.981	36.578	35.722	41.173	41.044	40.035	36.219	38.869
	40.719	38.279	40.69	40.451	40.821	41.44	39.945	40.356	42.771	40.7	37.074	40.795	36.942	36.758	35.067	36.4	38.213	41.328	40.658	38.443	37.172	38.491
	38.551	38.963	42.136	39.475	40.219	41.659	40.293	39.931	41.946	40.142	34.682	39.193	34.001	38.362	36.705	37.54	38.962	41.171	39.769	39.532	36.561	39.747
	37.666	39.377	40.776	39.786	40.854	40.813	39.584	40.261	42.279	39.673	36.483	41.452	33.547	36.998	34.02	33.365	38.788	40.965	40.476	39.974	NaN	39.422
	38.831	39.299	41.161	39.457	41.352	41.866	39.995	40.539	42.798	39.936	38.063	40.415	34.523	36.894	37.252	37.443	36.235	40.594	40.283	39.972	NaN	40.001
	39.142	39.335	41.888	39.687	40.803	41.594	39.34	41.424	41.679	40.802	37.183	41.299	NaN	37.26	37.626	35.03	36.914	41.475	40.551	38.971	NaN	39.935
	40.946	39.3	42.294	41.121	40.049	40.601	39.713	40.349	42.618	40.237	36.245	39.346	37.977	37.494	35.846	37.934	35.341	41.609	40.504	39.502	NaN	39.644
	40.975	38.087	41.834	40.813	41.107	41.526	39.238	41.573	40.915	39.924	35.85	40.362	33.44	37.682	37.374	35.645	35.958	41.066	39.645	39.847	31.515	37.14
	38.729	39.094	41.537	40.781	40.56	41.595	39.781	41.04	42.744	39.196	38.285	41.434	NaN	37.484	34.491	37.021	38.679	40.068	40.653	40.559	NaN	39.693
	39.643	38.681	41.604	40.677	41.195	41.611	39.935	40.071	42.584	40.463	37.445	40.042	33.331	37.581	36.074	37.651	34.81	41.99	40.555	37.977	NaN	39.518
	38.218	39.624	41.83	39.352	40.214	41.345	40.416	41.047	42.652	40.432	37.935	40.22	35.539	37.697	37.277	38.243	38.342	41.202	40.194	37.776	34.711	39.035
	39.858	37.467	42.249	37.891	40.008	41.598	40.457	40.074	42.865	40.609	34.255	41.051	37.44	35.938	34.225	37.003	38.865	41.706	40.177	40.481	33.995	39.221
	39.09	37.852	41.12	40.203	40.799	42.147	39.627	40.044	41.462	40.635	36.346	40.564	37.23	38.388	35.824	38.047	36.415	41.265	40.249	39.539	34.607	40.243
	39.573	38.907	42.271	39.816	39.935	41.567	40.308	40.704	42.673	40.761	37.564	40.536	37.922	36.763	35.09	38.507	38.507	41.576	41.08	39.303	32.975	40.007
	37.606	38.994	41.091	40.396	40.815	42.04	39.859	40.295	42.131	40.478	37.714	39.912	NaN	37.75	35.095	36.622	36.634	40.813	40.733	40.691	NaN	39.9
	40.098	39.867	41.857	40.533	39.819	41.735	39.102	41.381	41.893	40.088	35.637	40.592	36.381	36.95	38.333	37.489	38.394	40.319	40.265	40.685	NaN	38.09
	40.457	38.91	42.076	41.112	40.286	41.313	38.404	40.245	42.764	41.478	38.52	40.708	36.033	37.386	37.334	36.157	37.819	41.309	40.658	39.039	NaN	39.929
	38.777	39.659	41.012	40.429	39.565	41.224	39.089	40.744	42.449	40.785	35.539	40.323	NaN	36.962	34.652	37.75	39.41	40.611	40.433	39.948	34.747	39.397
	40.636	38.951	41.903	41.079	40.619	41.641	38.842	40.935	42.556	39.096	36.173	41.067	37.922	37.541	34.88	37.261	38.868	41.202	40.718	40.495	NaN	39.857
	40.721	38.226	42.01	40.42	40.579	41.288	38.433	40.317	42.764	41.143	36.315	40.594	34.855	37.113	33.58	34.213	36.37	41.401	39.704	39.974	NaN	38.8
	40.878	37.294	40.754	40.568	41.332	42.37	38.551	38.629	42.917	40.574	36.642	40.505	33.543	38.086	36.471	36.105	37.83	41.567	40.275	39.323	37.462	39.425
	38.954	38.409	41.986	39.764	40.196	41.365	39.645	39.833	42.148	40.499	35.508	40.723	37.697	37.084	38.548	37.043	38.526	41.067	39.088	38.98	32.882	39.99
	41.653	39.21	42.001	41.145	40.929	41.376	39.844	40.674	42.629	40.544	35.906	40.863	36.491	37.568	37.576	36.441	38.113	40.931	39.167	36.491	35.041	38.582
	39.319	38.68	42.023	38.702	41.506	41.816	39.401	41.146	41.547	40.775	34.624	40.591	34.756	37.851	36.81	36.777	38.054	41.898	40.365	40.204	35.316	38.749
	39.23	39.494	41.581	40.636	39.576	40.74	39.772	40.335	42.202	40.618	36.919	40.464	37.83	37.159	38.724	35.045	37.822	41.784	40.673	40.188	NaN	39.971
	40.773	38.983	41.766	39.009	40.441	41.122	38.98	39.722	42.323	40.721	36.563	40.053	37.979	37.856	37.655	36.973	35.925	41.979	40.76	37.884	NaN	39.796
	40.752	38.722	41.903	37.829	40.662	41.756	39.74	40.365	41.906	41.123	33.771	40.23	37.918	35.082	36.968	37.562	36.983	41.509	40.635	40.634	33.134	38.142
	40.68	39.322	41.655	40.394	40.431	41.521	40.238	39.936	42.277	39.722	35.984	39.997	34.968	37.79	37.03	37.334	39.157	41.632	39.814	36.691	NaN	39.881
	40.107	37.427	41.601	41.081	39.74	41.502	40.657	41.09	41.696	39.898	37.501	40.313	33.069	37.013	36.228	36.794	37.878	41.641	39.751	40.241	NaN	38.958
	39.697	39.381	41.327	38.743	41.312	41.954	39.939	41.071	42.404	40.857	34.932	40.929	35.028	36.462	37.074	36.546	39.263	40.712	40.239	38.762	NaN	38.516
	41.079	38.659	41.833	40.179	39.681	41.342	39.993	40.225	42.342	40.841	37.619	41.102	36.325	38.105	36.971	38.148	38.727	41.144	40.377	39.226	NaN	40.561
	39.543	38.221	42.147	40.314	41.414	40.852	40.311	41.459	42.372	40.238	35.752	40.38	37.77	37.784	34.422	34.369	36.036	41.224	40.038	39.636	31.405	37.685
	38.868	39.107	42.022	40.941	40.84	42.188	39.717	40.121	42.629	40.109	37.142	40.788	35.699	37.3	36.465	36.017	38.848	41.106	41.097	39.501	NaN	38.415
	41.296	35.914	41.322	39.733	40.251	41.111	40.26	39.287	42.337	40.479	38.056	41.092	35.606	35.907	36.168	38.192	38.748	41.255	40.683	39.565	33.899	38.525
	39.952	36.778	41.769	40.798	40.511	41.356	39.856	40.208	42.375	40.714	36.966	40.147	37.543	36.254	37.122	37.704	33.699	40.727	39.684	40.433	NaN	40.034
	37.952	39.381	42.076	39.945	40.994	41.345	40.115	41.101	42.378	40.267	35.758	39.828	36.95	37.301	35.251	36.663	38.11	40.844	40.987	40.445	37.035	38.881
	41.039	39.313	42.026	39.965	40.572	42.218	39.327	40.565	42.587	40.84	NaN	41.079	36.303	37.899	37.307	36.592	38.505	40.893	40.671	39.687	NaN	39.187
	40.91	36.967	40.975	41.173	40.709	42.052	39.664	40.308	42.113	40.747	35.888	41.03	36.957	36.936	38.701	37.249	36.649	41.113	40.954	40.676	34.551	39.482
	39.985	39.465	40.079	40.064	40.188	41.011	39.567	41.022	41.994	39.8	35.36	39.285	36.125	37.171	34.496	37.384	38.224	41.007	40.409	40.827	36.109	40.134
	40.509	40.052	42.552	38.077	41.148	41.662	40.401	40.248	41.893	40.816	37.455	40.727	37.564	36.989	37.087	37.055	38.565	41.406	39.997	40.471	34.446	39.608
	40.721	37.405	40.974	39.896	40.494	41.189	39.986	41.285	41.184	40.355	34.034	39.809	37.939	37.819	34.786	36.41	37.075	41.512	40.936	39.244	NaN	39.341
	39.547	39.357	42.277	41.126	40.399	41.956	40.094	40.429	42.377	39.31	38.978	41.127	33.606	37.865	37.142	36.335	37.337	41.882	41.11	37.426	NaN	39.444
	39.006	38.265	41.216	40.017	39.902	42.233	39.708	40.343	NaN	40.913	36.545	40.176	31.923	37.543	36.945	35.093	36.34	40.89	40.104	40.051	35.964	40.394
	41.317	39.604	41.596	40.921	41.192	41.742	40.381	41.625	42.165	40.333	38.155	40.116	35.642	37.687	36.737	36.252	38.716	41.37	40.831	39.296	NaN	39.324
	40.901	38.323	40.811	39.705	40.154	40.608	40.326	40.797	42.784	40.433	35.111	40.425	35.877	36.873	36.628	36.659	34.042	39.816	40.568	40.146	NaN	39.415
	39.445	39.171	40.907	40.222	40.776	42.422	39.783	39.795	41.933	39.793	37.729	40.538	36.113	37.593	36.018	38.386	37.396	41.667	40.74	40.364	36.644	38.667
	40.625	38.963	41.733	41.035	41.22	41.185	40.063	39.967	42.843	40.493	33.327	40.081	35.728	37.462	36.811	37.859	38.63	41.256	40.423	40.196	31.44	40.244
	38.646	37.479	40.858	39.39	41.176	41.554	39.822	39.717	42.794	40.302	37.411	40.815	35.203	37.252	35.526	34.877	37.344	41.109	41.054	40.631	NaN	39.686
	37.594	38.986	40.497	40.248	40.912	41.745	39.329	38.996	42.659	38.814	36.746	41.444	36.138	37.705	34.658	37.687	37.432	41.439	40.201	39.292	NaN	37.18
	39.989	38.319	41.448	40.621	40.343	41.86	39.789	40.421	42.334	41.119	35.871	40.846	36.694	37.836	37.116	38.119	37.094	41.167	40.037	39.435	NaN	38.672
	38.699	36.62	39.586	39.343	40.677	41.903	38.536	41.129	42.954	40.526	38.043	41.203	38.227	36.851	37.263	37.9	NaN	40.928	40.515	40.038	NaN	38.475
	40.483	37.514	41.291	41.086	40.122	41.747	39.348	41.299	41.518	39.859	33.312	40.655	36.227	37.435	37.032	38.949	37.483	40.715	40.155	40.527	32.306	39.026
	40.587	38.159	40.77	41.111	39.379	41.921	40.033	40.969	42.481	40.351	36.818	40.108	37.734	38.701	38.509	34.103	37.499	40.805	40.793	38.49	NaN	38.384
	35.92	38.973	42.04	38.239	40.255	41.535	39.316	40.933	42.21	39.485	35.951	39.347	34.505	36.923	33.997	36.524	38.667	40.565	40.348	39.935	NaN	39.249
	38.74	36.656	42.165	40.569	40.328	41.76	40.343	39.801	42.243	39.713	37.108	40.686	36.159	38.268	37.181	30.437	38.252	39.985	41.114	40.16	NaN	38.154
	40.201	36.571	41.54	40.843	41.074	41.417	40.693	39.364	42.903	39.982	35.181	39.999	36.046	37.387	36.834	37.656	38.115	41.386	40.037	38.452	34.122	38.855
	39.929	38.396	41.193	40.033	41.206	41.169	40.108	39.453	42.771	41.304	36.747	40.97	34.813	36.865	39.003	38.683	37.264	41.483	40.933	39.461	37.038	39.116
	40.398	37.118	42.102	38.097	41.209	41.207	40.457	39.476	41.298	40.591	35.771	39.528	35.116	36.639	34.75	34.864	37.271	41.134	39.981	40.458	NaN	40.078
	39.735	39.468	41.456	38.303	39.721	41.751	39.148	40.473	NaN	40.603	36.149	39.891	35.76	37.637	37.176	38.058	37.201	40.665	41.389	37.74	NaN	37.416
	40.301	36.752	40.064	41.081	39.439	41.934	40.667	38.289	42.107	39.862	38.49	40.258	35.964	38.594	37.898	37.455	36.957	41.335	40.391	37.807	NaN	39.858
	38.734	39.636	41.107	39.495	40.677	42.468	39.917	41.524	42.317	40.887	38.224	39.421	NaN	36.34	34.851	33.681	37.652	41.358	40.577	39.819	NaN	38.238
	38.852	38.869	40.826	40.101	41.102	41.405	39.774	40.309	42.689	40.265	35.091	40.468	35.954	38.01	34.676	36.916	38.596	41.598	40.545	37.706	35.865	38.39
	40.592	39.825	41.867	39.754	40.547	40.918	40.236	40.328	42.292	39.53	34.554	40.627	34.042	38.056	35.602	35.292	36.227	40.416	41.55	36.816	35.488	40.102
	37.086	37.465	41.531	39.473	40.389	41.48	39.917	40.503	42.45	39.742	37.37	40.864	31.893	37.188	37.146	37.039	39.157	40.593	40.107	40.687	33.904	39.839
	39.103	38.072	41.569	41.137	41.252	41.708	39.839	40.916	42.623	40.459	35.653	40.375	NaN	36.929	34.535	35.779	37.7	41.239	40.783	40.547	NaN	40.489
	38.276	37.897	41.887	38.494	40.324	41.48	39.562	39.998	42.556	40.437	37.373	40.676	35.972	37.595	36.553	37.872	35.453	41.513	40.405	39.147	NaN	39.442
	39.197	38.078	41.861	40.786	40.129	41.732	40.274	37.851	42.659	39.943	38.281	39.615	34.13	37.851	35.638	35.423	35.821	40.485	40.616	39.675	36.656	39.887
	40.516	39.058	42.019	39.731	40.811	41.837	40.166	40.388	41.694	40.275	38.721	39.52	35.777	36.681	37.459	38.292	36.512	41.263	40.089	38.289	32.073	39.23
	39.53	39.024	41.618	39.912	41.05	41.704	39.801	40.778	41.45	40.605	35.266	40.194	37.628	38.737	31.836	34.143	38.366	41.317	40.243	40.05	NaN	38.878
	39.595	39.537	41.774	39.124	39.566	41.636	39.903	40.119	41.231	38.781	35.487	40.183	33.74	37.742	37.19	31.61	37.125	41.962	40.142	40.065	NaN	39.464
	39.422	37.628	42.061	40.034	40.863	41.582	39.741	40.852	43.065	40.714	36.429	41.075	36.734	38.201	36.556	36.821	36.178	41.145	40.132	39.36	NaN	39.087
	41.823	38.224	39.793	40.032	41.025	42.048	39.312	41.502	42.452	41.191	34.994	40.292	37.808	37.388	34.815	38.766	37.145	41.892	40.045	39.784	31.852	37.981
	41.033	37.395	41.31	40.275	40.928	41.81	39.968	39.66	42.618	40.111	35.587	41.059	37.803	37.866	32.987	35.301	37.059	40.819	39.02	39.328	36.089	39.955
	37.653	39.683	41.382	40.155	40.579	41.526	39.696	40.186	42.162	40.446	37.257	40.167	38.296	37.551	38.314	35.274	33.708	40.465	41.27	35.524	NaN	40.074
	38.93	37.109	40.575	40.186	40.825	41.338	39.942	40.196	41.689	39.359	36.727	40.316	34.678	37.026	37.321	38.628	38.55	42.13	40.884	37.797	NaN	39.86
	39.542	38.263	41.613	39.878	40.86	41.406	39.536	40.711	42.955	40.508	34.218	40.964	34.843	37.039	36.988	34.017	34.8	40.634	40.763	38.514	NaN	38.937
	39.683	38.962	41.257	40.649	40.638	42.14	40.393	41.153	42.428	38.612	37.292	40.143	36.498	36.302	37.278	NaN	39.161	41.643	40.488	40.805	NaN	40.206
	38.971	38.285	42.092	40.538	39.445	42.285	39.829	40.302	42.174	40.146	36.439	40.298	36.918	36.978	36.48	32.957	35.282	41.423	40.908	40.858	33.737	38.865
	37.193	38.151	42.467	40.809	39.913	41.885	39.629	40.256	41.614	40.012	35.355	38.726	32.872	36.608	36.629	33.082	37.059	40.89	40.633	39.28	35.625	38.905
	40.378	38.606	42.217	40.607	40.76	41.073	39.491	40.829	41.804	39.851	35.514	40.496	37.303	38.004	37.436	35.625	38.564	41.131	40.669	38.688	35.863	39.158
	40.767	36.868	41.221	39.688	40.577	41.644	39.134	40.209	40.659	39.921	37.333	39.994	37.886	36.392	31.566	37.798	36.175	40.617	40.394	39.27	NaN	39.82
	40.805	38.665	41.754	40.627	40.008	41.789	39.82	40.777	43.039	40.054	32.206	41.384	37.372	37.441	35.069	37.168	36.249	40.801	40.866	37.633	NaN	38.821
	40.505	39.557	41.703	40.307	40.416	41.895	40.405	41.199	42.053	40.251	37.638	40.069	33.998	38.224	35.605	36.698	34.665	40.044	40.543	40.906	NaN	39.603
	40.2	38.787	42.037	40.337	40.606	40.531	39.546	39.557	41.67	39.867	37.013	40.089	34.65	36.622	31.235	37.708	35.954	41.067	40.325	38.404	NaN	39.581
	40.28	39.373	41.328	40.404	41.637	41.505	40.286	40.393	42.388	40.982	35.987	40.684	35.616	37.673	37.56	35.166	34.859	40.511	40.685	39.82	NaN	37.768
	41.044	37.202	40.828	39.6	40.479	41.794	40.315	41.02	42.856	40.16	37.957	40.115	31.685	38.159	37.976	32.28	38.796	41.655	40.85	39.517	NaN	39.719
	39.918	38.891	41.236	39.538	39.65	41.853	39.162	40.316	42.621	39.755	NaN	40.094	36.688	37.539	37.678	36.7	36.752	41.286	39.811	40.139	NaN	39.122
	40.955	38.376	41.354	40.27	40.819	41.804	40.237	39.548	42.222	40.857	35.031	39.95	36.256	37.854	32.743	38.128	39.063	41.003	40.811	39.223	NaN	40.395
	39.468	36.901	42	38.656	40.917	41.439	40.307	39.853	42.312	40.217	39.018	38.742	36.97	37.577	36.032	37.653	36.473	41.852	41.032	40.174	31.633	39.031
	37.991	39.454	40.897	40.319	40.872	41.142	40.644	40.88	42.213	40.026	35.223	40.042	37.44	38.691	35.854	36.819	NaN	40.725	40.038	40.001	NaN	38.042
	38.872	39.816	41.302	41.3	41.096	41.173	40.151	40.214	41.745	40.134	35.435	39.274	36.845	37.069	34.265	36.453	37.755	41.236	39.789	38.676	NaN	39.828
	40.374	38.716	41.791	39.75	40.341	41.662	40.216	41.038	42.297	39.599	36.616	40.693	34.436	37.343	37.105	36.935	38.426	40.06	40.336	40.356	NaN	40.196
	39.195	39.271	41.935	39.298	39.947	41.495	39.41	40.546	41.773	39.96	38.06	40.014	36.241	38.395	36.933	35.485	36.342	42.113	40.454	39.017	NaN	38.809
	40.911	35.09	41.394	39.023	40.926	41.667	38.51	40.395	42.744	40.08	33.801	41.08	33.213	38.266	35.389	36.206	37.178	40.77	40.852	39.048	NaN	36.621
	38.601	38.094	41.287	40.874	39.707	42.286	39.425	41.095	40.366	40.105	39.359	40.845	37.129	37.954	37.993	35.497	34.283	40.922	40.456	39.609	NaN	39.219
	39.382	39.006	41.31	39.76	40.719	41.864	39.911	40.125	42.589	40.38	35.164	40.279	37.027	37.389	34.334	36.408	36.207	41.454	40.252	39.68	34.418	38.463
	38.242	39.784	42.226	37.79	41.033	40.821	39.301	40.539	41.06	40.907	35.321	40.18	34.159	37.954	38.393	37.194	38.283	41.08	40.425	40.636	NaN	38.275
	40.747	36.718	41.159	38.99	39.638	42.22	40.561	40.925	42.568	39.273	36.794	39.127	36.145	37.462	33.072	38.206	38.111	40.216	41.067	40.706	37.416	38.951
	37.788	39.082	41.94	40.38	40.091	41.633	40.834	40.168	42.65	40.705	32.997	39.384	32.614	37.631	33.869	36.113	37.839	41.432	40.182	36.506	NaN	39.486
	40.848	37.803	42.254	40.726	40.366	41.761	40.14	39.391	42.686	39.904	38.321	40.25	37.263	37.576	37.184	36.228	35.51	40.819	40.295	39.991	35.159	38.981
	38.51	39.087	41.915	40.886	40.709	41.893	39.547	40.948	42.031	39.98	34.555	40.397	36.432	38.044	37.661	36.68	36.278	41.337	40.03	40.402	34.881	38.181
	40.459	39.898	40.84	39.817	39.634	41.476	40.158	39.666	42.48	40.875	37.806	38.961	34.54	36.383	33.793	35.73	34.939	40.681	40.025	39.305	31.278	40.542
	38.607	39.146	41.185	39.365	41.244	41.542	40.611	40.127	41.891	40.37	37.557	40.633	35.998	37.741	36.429	36.702	37.517	39.91	40.001	39.433	32.603	39.615
	40.589	36.953	40.326	40.063	40.741	40.723	39.246	41.718	42.601	40.197	37.518	40.435	37.819	37.641	33.522	37.636	34.461	40.731	40.733	38.145	NaN	38.101
	37.64	39.34	42.166	39.124	40.912	41.893	40.332	38.385	42.895	40.438	35.038	40.394	37.405	36.416	36.42	35.453	36.113	40.038	39.752	33.696	NaN	39.587
	39.369	39.056	42.225	41.308	41.135	41.727	39.952	40.525	42.299	40.459	36.335	40.405	NaN	37.082	37.784	37.127	35.801	40.942	41.079	39.871	NaN	39.355
	39.021	40.042	42.185	40.342	40.858	41.193	39.736	40.328	42.313	40.118	35.886	40.25	38.236	38.003	34.633	38.295	33.876	40.378	41.125	38.749	NaN	38.347
	40.209	39.199	40.992	39.007	41.113	42.25	39.628	41.253	42.915	38.667	31.623	39.96	36.339	37.813	37.54	36.88	37.426	41.441	40.97	38.514	32.454	39.6
	40.058	39.288	40.889	39.261	40.491	41.479	39.106	40.206	41.84	40.382	36.218	41.308	33.812	36.717	37.862	34.524	37.517	41.621	40.177	39.773	NaN	39.145
	39.669	38.702	41.275	40.824	39.175	41.727	39.527	39.705	42.234	40.491	36.064	39.703	34.99	37.464	36.846	35.255	36.897	39.941	41.354	38.138	NaN	39.133
	40.854	38.891	41.197	40.278	40.626	41.147	39.981	40.362	41.72	40.293	35.253	40.589	36.887	37.064	NaN	36.739	35.737	41.81	41.006	39.123	NaN	39.24
	41.634	39.031	41.935	40.117	40.941	42.106	39.404	40.343	42.287	41.078	36.695	39.344	36.798	37.092	38.158	37.217	38.333	40.806	39.976	38.383	NaN	39.931
	39.847	39.017	42.644	39.712	40.128	41.675	39.668	39.417	NaN	40.46	38.101	40.515	33.992	38.734	34.73	35.041	38.409	41.234	40.668	40.001	31.753	37.537
	39.444	38.215	42.298	40.272	41.128	41.63	40.113	40.924	41.347	38.969	37.618	40.461	36.822	37.447	37.709	37.631	38.449	40.301	41.262	38.609	NaN	39.691
	39.649	40.217	41.395	39.77	40.322	41.889	40.112	40.832	42.393	40.233	34.804	40.088	36.989	38.919	37.32	36.09	38.249	40.995	40.322	39.861	NaN	39.247
	39.467	39.296	41.117	39.868	40.304	41.398	40.097	38.969	42.598	40.293	34.458	40.052	33.538	37.735	35.98	37.984	38.293	41.009	40.154	39.108	NaN	39.14
	39.626	38.996	41.493	41.302	39.891	41.783	40.168	38.519	42.275	40.85	33.868	39.666	NaN	36.914	37.328	37.702	36.836	40.93	40.608	40.78	33.996	38.737
	40.123	36.564	41.329	39.569	39.97	41.628	39.312	40.605	42.505	40.087	36.367	39.175	36.716	36.39	37.062	37.595	35.638	41.712	39.479	40.625	34.001	40.469
	39.551	37.5	42.149	41.111	40.129	41.898	39.528	40.674	42.73	40.805	33.471	40.84	34.857	37.986	37.484	35.818	37.018	40.955	40.285	39.625	NaN	39.522
	40.437	38.421	41.054	39.981	40.911	41.926	40.264	41.212	42.51	40.54	33.582	40.635	37.241	37.393	38.376	37.668	35.362	41.398	39.997	39.592	32.828	38.723
	38.863	38.589	41.21	39.678	40.116	40.29	39.755	39.29	40.324	40.009	36.842	40.05	33.693	37.367	36.978	35.308	37.222	40.595	40.617	39.427	NaN	38.852
	40.236	37.619	42.41	40.013	40.288	41.164	39.625	40.852	42.085	40.198	37.858	39.953	34.854	37.572	36.52	36.526	37.749	41.747	40.567	40.46	36.308	38.474
	38.708	39.142	41.192	39.181	41.069	41.081	39.886	39.526	42.293	39.571	39.516	40.176	35.384	37.96	37.681	37.892	37.237	41.547	40.007	39.979	NaN	38.951
	39.02	37.809	42.374	40.859	39.894	41.261	40.614	40.664	42.818	39.693	33.153	40.023	34.586	37.347	37.284	35.464	37.025	40.418	39.716	40.043	NaN	38.815
	40.551	39.483	40.582	39.84	40.641	41.68	39.978	40.908	42.688	39.937	34.219	40.673	35.832	37.018	31.494	35.934	37.942	40.98	40.753	38.425	NaN	38.992
	39.004	39.965	41.104	40.796	39.225	41.554	39.598	40.125	42.806	39.96	37.618	40.545	NaN	37.948	37.724	38.192	35.833	41.346	41.304	39.549	35.71	38.527
	37.931	38.517	42.232	38.555	39.342	40.441	40.592	40.642	42.635	39.688	36.312	40.244	36.525	38.462	35.711	37.175	37.207	41.829	41.049	39.225	36.524	38.808
	41.256	39.782	42.016	40.407	40.769	41.873	39.864	40.527	42.183	41.129	36.463	40.821	36.16	36.977	35.922	38.913	38.799	41.446	40.288	35.705	NaN	40.395
	40.205	39.134	41.674	39.823	40.534	41.609	39.901	40.202	42.182	39.707	37.16	40.144	36.967	37.633	33.536	37.565	38.855	40.362	39.934	39.262	NaN	38.665
	40.337	39.276	42.134	39.595	40.378	42.157	40.1	40.96	42.863	40.36	35.692	40.417	35.147	36.425	36.876	35.837	37.123	41.442	40.182	40.381	32.623	39.182
	41.175	39.589	41.051	41.243	39.931	41.876	40.467	40.73	42.819	40.796	38.154	39.539	NaN	36.545	36.86	36.114	37.492	41.062	40.304	39.95	34.049	40.529
	39.669	37.837	41.731	40.233	40.426	41.305	39.742	39.921	NaN	40.169	36.534	40.595	38.523	37.245	37.384	36.332	35.636	40.619	40.228	39.928	NaN	38.145
	40.71	39.912	41.099	40.001	41.109	41.347	39.682	40.273	42.674	41.204	36.119	40.004	NaN	36.961	38.114	37.538	38.411	41.559	40.119	36.82	NaN	39.265
	37.214	39.473	41.505	39.351	40.328	41.425	40.181	39.535	41.925	40.543	37.497	40.429	34.794	37.864	38.509	34.917	37.163	40.588	40.499	40.203	NaN	38.409
	39.553	37.776	41.266	40.195	40.49	42.337	40.636	40.985	41.503	40.251	37.02	40.243	37.805	38.537	37.358	35.211	36.808	40.311	40.307	35.347	NaN	40.15
	39.953	38.138	41.191	39.86	40.891	41.991	39.836	39.631	42.488	40.671	36.698	40.29	37.091	36.637	36.702	37.785	36.976	40.97	39.183	40.233	34.665	39.855
	40.439	39.165	40.642	38.739	40.028	42.467	40.002	40.42	42.599	40.136	37.693	40.71	36.842	36.94	37.496	37.303	36.672	39.675	40.65	39.316	NaN	38.246
	40.907	39.712	41.428	39.383	40.047	40.528	39.713	39.949	40.623	39.567	36.104	39.835	35.959	38.225	37.205	37.958	33.327	41.422	40.597	40.575	36.137	39.888
	40.099	39.918	41.033	39.367	40.498	42.089	40.933	40.722	41.042	39.537	33.977	40.402	34.965	38.439	38.03	34.155	36.719	41.107	39.839	39.189	36.806	39.858
	40.581	37.269	41.517	40.645	40.542	41.472	40.741	40.816	42.228	39.223	32.384	40.495	35.256	37.23	38.155	38.303	36.615	41.736	40.31	37.115	NaN	40.123
	41.044	38.206	41.728	40.633	40.282	41.521	40.167	40.824	41.952	40.642	33.763	40.814	37.294	38.286	37.209	36.369	37.967	41.779	40.483	40.978	32.999	40.72
	38.697	37.46	42.278	40.264	40.742	41.277	39.529	41.009	42.297	40.608	34.9	40.054	36.627	37.954	37.937	33.082	37.361	41.094	40.855	40.099	NaN	39.134
	40.259	39.139	41.333	40.2	40.491	41.281	39.009	40.671	42.645	40.176	33.05	40.069	36.128	37.156	37.894	35.878	39.078	39.968	40.944	37.89	NaN	38.387
	38.74	37.937	41.738	39.717	40.899	41.68	40.433	40.526	41.127	41.283	37.258	41.003	37.408	38.403	37.199	37.52	37.818	41.453	40.32	40.152	35.724	40.197
	40.253	38.935	41.253	40.687	40.311	41.43	39.585	39.885	42.523	39.014	35.985	39.761	34.992	37.572	34.502	37.205	34.362	40.981	40.381	39.127	NaN	39.877
	39.141	38.705	41.853	40.226	40.93	41.812	39.994	39.455	42.832	40.556	36.502	40.519	33.202	36.997	35.475	31.411	37.071	41.398	40.53	39.487	33.232	38.852
	40.679	39.546	41.65	41.054	40.151	41.903	40.274	39.808	41.695	39.507	35.47	40.427	37	37.398	37.397	35.074	35.63	40.881	40.31	39.828	NaN	38.506
	36.258	37.263	41.389	40.601	41.283	41.611	40.33	41.227	42.16	40.513	38.756	41.439	34.638	37.617	36.552	36.93	38.217	39.262	40.251	36.25	NaN	38.74
	38.599	38.357	42.183	40.861	40.95	41.005	39.463	41.301	41.814	39.93	37.726	40.95	37.445	37.546	36.619	NaN	35.791	41.052	40.405	39.882	NaN	39.153
	39.476	38.359	42.41	38.692	40.208	41.474	40.109	39.983	42.036	39.614	38.05	40.344	35.043	37.329	38.049	38.418	38.089	41.204	39.303	39.767	NaN	39.583
	40.079	39.308	42.128	41.185	41.231	41.801	40.087	40.799	42.045	40.754	34.692	41.043	NaN	37.521	38.243	35.347	35.459	40.949	40.618	38.413	32.953	39.311
	40.48	39.055	41.576	39.86	40.612	40.728	39.284	40.656	42.362	40.085	31.573	40.168	37.233	37.195	38.403	36.705	36.132	41.238	40.882	40.19	NaN	38.151
	40.896	38.575	42.147	39.037	40.863	42.096	39.923	40.97	41.987	39.745	34.256	40.617	34.888	38.297	37.894	33.753	36.707	41.324	39.404	39.176	NaN	38.366
	38.342	38.215	41.52	40.29	40.532	41.718	40.059	41.337	42.298	40.279	38.045	40.841	36.659	38.254	37.27	34.286	37.866	42.103	39.228	39.776	33.557	39.544
	39.888	40.024	40.82	40.517	40.046	41.558	40.306	39.501	42.753	39.698	NaN	40.449	36.024	36.37	36.649	38.41	38.753	41.551	40.894	38.579	NaN	37.49
	40.469	38.323	41.39	40.905	41.17	41.441	39.747	40.062	41.94	39.7	36.736	40.608	33.863	38.118	37.874	34.695	38.107	41.395	40.711	39.357	NaN	38.284
	40.952	39.817	41.988	40.059	41.151	41.749	40.394	40.498	42.17	40.144	35.957	40.368	36.199	36.83	37.406	36.212	38.722	40.551	40.408	37.828	NaN	38.983
	40.104	39.211	41.662	40.838	40.67	41.637	39.767	38.889	42.214	40.861	37.414	39.981	34.611	37.479	34.618	37.773	38.087	41.039	41.095	38.094	33.196	38.655
	39.04	39.98	42.153	39.715	41.022	41.617	39.938	40.575	41.982	41.318	33.451	40.661	34.877	37.077	35.3	35.382	36.227	41.569	40.409	40.672	NaN	39.926
	40.265	36.642	42.874	40.688	40.661	42.203	40.397	39.211	43.025	40.207	36.73	40.658	37.383	36.988	36.178	36.916	36.481	41.433	40.434	40.316	34.285	38.069
	40.261	39.459	41.791	39.948	40.951	40.841	39.389	40.976	42.576	40.458	37.545	40.447	36.251	38.243	38.281	35.065	37.773	41.564	40.877	40.459	37.414	39.662
	41.091	37.732	41.656	40.419	40	41.139	40.527	40.822	42.413	40.512	38.481	40.541	37.815	36.162	37.768	37.103	34.423	40.237	39.886	40.3	NaN	38.31
	38.638	39.258	41.302	40.546	39.893	42.322	39.796	39.87	40.706	40.813	37.564	39.45	36.969	37.686	33.742	36.463	38.24	41.564	39.81	40.072	NaN	38.373
	39.605	36.303	41.348	39.66	41.184	41.809	40.167	41.109	42.113	40.28	36.481	40.574	36.913	38.17	35.686	36.405	36.231	40.752	40.67	37.942	32.212	39.019
	36.724	38.28	42.191	39.507	41.323	41.979	40.034	40.401	41.913	40.825	34.612	40.571	35.76	37.769	37.435	37.137	37.444	41.13	41.346	37.935	NaN	39.863
	40.659	37.413	42.639	39.927	40.786	41.522	39.883	40.314	42.851	38.976	36.055	40.888	36.305	38.136	36.551	35.981	38.067	41.055	40.983	40.585	33.362	39.634
	41.11	40.291	40.989	39.987	41.322	41.802	40.649	40.48	NaN	40.409	36.857	40.385	36.397	38.329	36.847	36.028	36.315	42.015	40.53	39.103	33.242	40.196
	37.858	40.035	41.696	38.515	40.954	41.8	39.334	41.18	NaN	39.853	34.404	39.245	36.408	36.794	34.761	34.625	38.513	41.148	40.89	38.273	36.623	38.551
	41.395	39.101	41.625	41.108	41.257	41.435	40.512	39.09	42.501	41.145	33.287	40.697	NaN	38.115	37.641	37.874	38.572	41.099	39.155	38.097	NaN	39.946
	39.44	39.379	41.296	40.47	40.615	41.893	39.878	41.214	42.25	39.739	39.041	41.149	34.863	37.496	36.532	33.915	33.583	41.786	40.406	38.248	36.151	39.606
	37.802	39.317	42.377	40.453	40.824	41.881	40.027	39.868	42.881	40.213	37.964	40.763	35.46	36.963	37.074	33.908	37.955	41.471	41.326	37.043	NaN	40.045
	41.434	39.394	42.165	38.973	39.888	42.192	40.535	39.246	42.07	40.401	37.159	39.927	37.611	38.019	38.29	37.533	35.563	40.11	40.685	38.758	NaN	38.427
	38.742	39.196	41.623	40.142	41.173	41.7	39.505	40.599	42.692	40.141	37.79	40.036	35.432	36.731	36.841	30.817	36.806	40.802	40.442	40.108	NaN	38.757
	41.441	38.529	41.854	39.927	40.2	41.784	39.968	39.415	42.895	39.512	37.395	40.68	34.569	38.129	37.349	36.453	35.837	39.822	40.001	38.555	NaN	39.458
	41.489	38.313	42.152	39.618	40.76	42.309	39.599	40.433	42.942	40.463	34.553	40.233	36.124	37.086	38.703	36.293	36.984	41.139	40.706	39.455	33.993	37.722
	37.836	40	41.121	39.171	40.004	41.583	39.04	40.496	NaN	40.588	32.893	40.09	33.341	37.873	37.942	35.14	34.616	41.194	40.446	39.088	NaN	39.61
	38.776	38.436	42.154	39.205	40.235	41.564	39.908	40.54	41.931	39.918	37.775	39.759	34.785	38.262	37.705	34.979	35.908	40.965	40.98	39.119	32.629	39.759
	37.91	37.994	41.082	39.771	40.388	41.879	39.776	41.176	42.746	39.921	38.174	40.818	36.765	36.737	34.397	32.458	38.988	41.207	39.724	39.931	NaN	40.624
	39.118	38.842	42.27	38.593	40.404	41.098	39.713	41.563	42.238	39.262	32.593	40.638	36.139	36.849	37.019	38.341	35.328	40.846	41.124	39.82	NaN	40.092
	38.392	39.381	41.217	40.13	40.238	41.761	39.759	39.558	NaN	40.984	34.428	40.559	34.038	37.783	37.9	36.482	NaN	40.845	39.287	38.357	32.209	38.454
	40.715	37.57	41.556	40.916	40.288	41.203	40.043	40.953	NaN	40.613	38.887	40.513	32.635	37.611	37.998	36.104	36.929	40.993	40.359	39.699	NaN	39.276
	38.21	38.957	41.625	38.284	41.051	41.992	40.913	37.533	42.872	40.697	32.1	40.18	33.025	38.063	37	36.547	36.569	41.361	41.652	40.31	34.177	39.214
	40.707	39.166	40.947	40.483	40.895	41.874	40.737	40.363	42.145	40.652	35.794	39.366	37.197	37.055	36.464	37.859	37.258	40.922	39.593	40.378	32.594	38.671
	39.119	38.981	40.996	39.756	40.743	42.275	40.353	40.595	42.856	39.636	36.869	39.721	36.031	38.409	35.861	37.94	33.44	39.865	40.082	38.738	31.992	39.785
	40.832	38.312	41.754	39.903	41.129	41.601	39.934	40.549	NaN	40.461	38.42	40.177	31.98	36.029	37.713	36.313	37.583	41.057	40.992	39.039	35.077	40.455
	40.724	38.255	42.154	41.319	40.987	41.727	39.724	40.513	41.61	39.186	38.992	39.266	34.644	36.615	38.568	35.854	37.836	40.016	40.12	40.493	NaN	39.392
	41.581	37.819	41.934	41.455	40.484	41.142	39.377	40.906	41.439	40.488	36.906	40.339	33.101	36.925	34.254	34.301	34.943	40.638	40.223	39.995	NaN	38.533
	39.435	39.464	42.256	40.406	40.079	41.075	40.22	39.741	42.707	40.747	36.113	41.062	33.279	38.26	38.654	36.263	33.178	42.12	40.01	38.428	37.446	39.894
	38.635	39.327	41.01	40.668	40.489	41.973	40.314	38.986	42.721	40.428	36.953	39.807	36.847	38.391	36.426	35.612	34.011	41.649	40.138	38.875	NaN	39.507
	39.876	38.396	42.083	39.508	39.88	41.76	40.452	40.435	42.047	40.112	38.881	40.997	33.974	38.123	36.859	37.531	34.237	41.084	41.055	39.585	NaN	39.983
	40.038	38.91	41.594	39.759	40.04	41.893	39.651	39.755	42.419	39.982	36.185	39.772	36.362	37.522	32.434	37.669	37.443	40.954	40.389	39.637	32.27	38.194
	39.972	38.076	41.547	38.626	39.166	41.759	39.538	40.448	42.545	39.916	NaN	39.306	34.739	37.031	36.976	36.067	36.368	41.68	40.394	39.419	NaN	39.81
	37.245	39.328	41.393	40.577	40.864	42.049	39.814	40.145	42.13	40.173	36.151	40.692	37.296	38.11	35.912	37.272	36.798	41.575	41.203	39.473	35.659	39.043
	39.209	36.804	41.013	39.651	40.646	41.588	39.11	41.141	42.741	40.521	36.101	40.364	35.639	36.685	34.613	35.462	36.748	41.845	37.517	40.486	NaN	39.684
	39.937	37.832	41.553	39.168	39.719	41.957	39.666	40.169	42.913	39.797	38.015	40.872	36.388	37.758	36.88	37.377	38.276	41.202	39.79	40.741	NaN	39.085
	40.671	39.802	41.417	39.903	40.862	41.309	40.062	39.284	42.276	40.452	37.137	39.418	36.339	38.231	38.027	38.287	38.377	41.204	40.526	39.322	37.325	41.097
	41.495	37.983	42.315	39.112	40.33	41.491	40.02	40.139	42.732	40.66	37.761	39.904	34.154	38.089	35.949	37.489	36.834	40.615	41.075	38.16	NaN	38.904
	39.317	39.54	41.805	40.341	40.878	41.77	40.592	40.322	42.58	40.552	36.353	40.616	NaN	37.46	36.752	38.095	36.737	41.153	40.969	38.59	NaN	37.869
	40.931	38.844	41.751	40.166	40.259	40.955	38.823	39.686	42.664	40.203	39.405	41.07	34.609	38.335	37.601	36.521	34.289	40.777	41.242	38.347	NaN	39.628
	40.444	37.866	42.343	40.68	41.246	41.525	38.804	40.268	42.573	40.401	36.819	40.321	33.621	37.61	34.775	36.22	34.761	40.874	40.911	38.565	34.019	40.362
	40.756	37.965	41.691	40.587	41.013	40.98	40.211	39.66	41.713	40.657	34.368	39.762	35.883	37.843	37.143	37.464	38.073	40.918	41.052	39.933	NaN	38.116
	38.964	36.352	41.192	40.174	41.285	41.329	40.374	40.443	42.304	40.273	38.122	39.446	37.238	37.559	36.208	36.785	37.831	40.398	40.561	40.824	32.667	39.212
	40.926	39.187	42.073	39.844	40.705	41.655	40.589	40.338	42.829	40.504	37.942	39.278	36.883	37.316	36.433	35.587	36.942	41.257	40.563	40.035	35.379	39.305
	37.92	38.771	41.093	38.957	39.82	41.704	40.004	40.309	42.14	39.363	38.544	39.646	35.29	38.538	36.468	36.291	38.248	41.172	40.051	40.719	34.201	38.293
	38.968	37.582	40.835	39.686	39.595	41.403	40.129	41.078	42.574	39.736	37.396	40.985	36.9	38.033	37.137	33.853	39.439	41.982	40.74	40.152	35.546	39.325
	40.981	39.903	42.224	40.195	40.93	41.333	39.663	40.577	42.198	40.157	39.143	40.51	35.725	36.163	37.722	35.387	38.405	41.669	41.307	37.735	33.008	39.452
	41.063	37.119	41.545	41.03	40.554	41.443	40.685	41.726	42.274	39.832	38.491	39.445	33.716	37.533	36.234	37.137	36.867	40.422	40.801	39.783	32.929	40.369
	39.39	39.236	42.011	40.976	40.583	41.567	40.04	40.452	42.2	39.799	35.221	40.002	37.603	37.15	37.161	37.765	36.16	41.206	40.257	38.726	33.676	39.435
	40.998	38.85	40.862	40.345	40.916	41.286	39.624	40.87	42.498	39.458	33.707	40.067	37.351	37.96	37.216	38.125	36.416	40.65	40.348	40.78	32.626	39.614
	40.672	40.112	41.608	39.748	41.407	41.949	40.112	40.269	42.821	40.289	34.135	39.996	32.469	37.693	36.327	37.497	35.287	39.869	40.225	40.524	37.307	38.768
	40.503	38.491	41.574	40.891	40.951	41.694	39.846	40.842	42.583	39.96	37.205	40.364	37.118	37.459	36.663	34.481	34.889	41.621	39.826	39.504	NaN	39.212
	39.769	39.101	41.236	40.149	40.298	41.666	40.02	39.252	42.154	41.1	38.056	40.089	32.74	37.516	38.244	36.413	34.474	41.003	40.806	40.602	34.977	38.326
	38.937	37.383	41.713	40.031	40.343	41.777	40.454	41.103	NaN	39.874	34.768	40.012	36.786	36.396	36.457	36.687	38.168	40.877	41.286	41.36	34.541	40.124
	40.588	38.588	40.818	40.496	40.258	41.09	39.435	40.52	41.877	40.117	37.037	40.682	35.836	36.226	37.954	37.766	37.285	40.74	40.603	39.115	NaN	40.253
	38.101	39.44	41.84	39.562	41.028	41.575	40.092	41.159	42.413	40.532	36.689	40.009	35.526	37.923	35.614	37.571	38.797	41.173	40.07	38.985	NaN	40.187
	41.191	38.683	41.149	41.138	40.413	41.875	38.482	39.914	42.298	40.928	36.634	39.82	36.488	36.346	37.643	37.57	37.612	40.199	40.684	39.092	NaN	40.642
	40.646	37.416	41.542	40.678	40.934	41.947	40.264	40.594	42.858	39.694	36.256	40.116	36.597	37.643	NaN	37.817	37.548	40.897	41.168	39.974	NaN	38.186
	38.407	39.4	42.11	38.656	39.971	41.821	38.901	40.506	41.6	40.671	37.346	40.234	33.832	37.178	36.144	37.542	38.284	41.233	40.615	39.625	35.543	39.705
	40.727	39.603	41.233	39.114	40.489	41.172	39.742	41.464	42.628	40.217	37.583	40.345	36.176	36.625	37.728	35.997	36.223	42.003	40.497	38.757	32.313	36.952
	38.414	38.529	41.912	39.231	40.363	40.843	39.979	40.261	NaN	40.308	35.203	40.299	NaN	37.768	35.541	35.945	35.937	41.161	40.881	38.214	NaN	38.291
	40.147	39.572	42.143	39.683	40.676	41.41	40.017	41.272	42.29	40.555	35.741	41.073	37.272	38.091	35.286	37.162	37.89	41.257	40.438	39.072	NaN	39.386
	41.334	39.848	41.468	40.939	40.24	41.188	39.744	39.776	41.862	40.118	35.117	40.616	35.793	37.28	38.031	38.785	37.974	41.201	39.968	40.127	36.071	39.4
	39.778	39.622	41.723	39.617	40.26	42.141	38.839	40.245	42.098	40.107	37.229	39.894	NaN	38.009	32.166	34.719	36.046	40.684	40.983	40.969	NaN	39.09
	40.948	37.154	41.595	40.698	40.749	42.033	39.893	40.923	42.873	40.619	38.566	40.104	35.907	36.497	33.212	34.725	38.076	40.306	40.32	40.082	33.872	36.779
	40.48	36.713	41.682	39.296	40.072	41.612	38.762	40.732	42.425	40.517	36.665	40.173	33.059	37.503	34.455	34.244	35.467	40.835	39.815	37.803	NaN	39.863
	41.036	38.827	42.064	40.152	41.018	41.365	39.199	40.836	42.142	40.618	39.282	41.196	34.29	37.18	37.107	35.787	36.628	41.264	40.502	40.65	35.469	39.694
	37.738	38.381	42.026	40.99	41.383	41.427	39.962	40.42	42.316	40.501	36.594	40.276	36.52	37.045	35.958	35.714	37.854	40.902	40.785	37.979	35.38	38.22
	40.999	39.755	42.223	40.6	40.506	41.794	39.109	40.664	42.982	40.087	38.556	40.804	36.298	36.656	37.336	NaN	31.98	41.375	40.622	39.454	NaN	38.014
	39.707	39.43	40.687	40.809	40.563	41.46	39.309	41.307	42.166	40.737	37.196	40.397	36.947	37.388	36.175	37.424	37.834	41.05	39.944	39.686	33.829	39.299
	41.153	39.814	41.104	40.429	40.09	41.425	39.699	40.056	42.834	39.705	36.745	40.297	35.416	36.293	37.099	36.455	36.109	41.271	40.108	40.385	35.141	40.313
	38.484	39.142	41.654	40.153	39.983	40.361	39.086	41.165	42.461	40.012	34.206	39.874	35.639	36.167	37.711	37.376	35.82	40.035	40.19	38.084	NaN	37.635
	35.189	38.97	41.881	40.448	40.624	41.77	39.971	39.88	41.854	40.006	38.081	40.772	37.685	37.723	37.016	38.075	38.577	40.685	40.584	39.854	NaN	39.39
	40.107	38.667	40.823	40.345	40.601	41.845	40.337	41.095	NaN	40.65	37.95	40.451	37.084	37.453	34.4	35.826	38.258	40.711	40.505	35.963	33.353	39.867
	40.541	38.538	41.96	38.323	40.24	41.666	39.507	40.617	42.093	39.972	37.306	40.724	37.337	37.871	37.792	34.133	38.663	40.998	39.947	40.243	NaN	37.097
	40.352	36.662	41.459	39.14	40.676	42.154	39.967	40.363	42.516	40.388	34.536	40.099	31.957	37.844	33.869	33.454	36.183	42.233	40.547	41.059	NaN	39.415
	39.174	36.972	41.637	40.401	40.181	41.86	40.113	39.932	41.844	39.545	36.908	39.559	36.979	38.322	35.46	37.078	34.724	39.952	40.884	40.182	NaN	39.255
	39.314	39.161	42.013	40.632	40.929	41.872	39.959	40.974	42.613	40.437	36.157	40.225	33.459	36.789	36.81	36.371	31.098	41.085	40.741	38.23	NaN	39.405
	38.785	39.596	42.301	39.76	41.247	42.032	40.07	38.732	42.551	39.802	34.804	40.511	35.443	37.424	36.368	38.05	36.629	40.972	41.195	39.269	35.666	39.918
	40.294	37.591	41.96	40.72	40.179	42.245	40.269	39.232	42.223	40.016	36.696	39.597	35.27	36.706	33.728	36.492	36.731	40.928	40.317	38.466	32.664	39.317
	40.202	38.028	41.311	40.876	41.217	41.575	39.92	39.85	43.064	40.112	38.413	39.505	37.004	37.137	34.209	37.143	36.496	41.8	40.697	37.975	33.751	39.378
	41.215	38.815	40.473	39.012	41.28	41.74	40.756	41.298	42.798	39.903	37.409	40.688	36.283	37.191	35.551	36.746	36.665	40.949	40.981	37.919	NaN	38.755
	39.08	39.132	42.213	39.918	40.381	42.252	40.15	39.92	42.689	40.634	38.382	40.441	35.54	38.132	37.157	35.583	38.047	41.248	39.465	39.712	33.69	39.11
	40.282	39.806	40.45	39.662	40.04	41.576	40.112	40.274	42.551	40.562	36.934	41.395	35.232	37.046	35.107	37.945	37.732	40.287	40.652	40.23	35.223	40.662
	40.782	36.535	41.084	40.082	41.112	41.941	39.755	40.596	42.281	39.683	37.302	40.667	34.853	37.919	34.754	32.329	38.905	41.616	39.765	40.336	37.172	39.757
	38.131	39.461	40.882	40.237	40.024	41.817	39.396	39.372	42.612	40.34	37.839	40.954	36.931	37.046	37.495	37.113	36.402	41.382	40.638	40.057	33.848	38.09
	40.006	39.198	41.573	39.629	40.258	41.831	39.92	41.263	42.354	38.788	37.849	40.386	35.337	37.405	34.533	38.241	37.425	40.711	41.182	39.573	NaN	37.052
	39.056	37.501	41.146	39.403	41.246	40.972	40.338	41.364	42.5	41.09	36.618	40.738	35.976	37.082	34.927	35.67	35.626	40.936	41.238	39.955	35.393	39.88
	40.859	37.347	42.269	40.892	40.725	41.173	40.563	40.367	42.029	39.4	34.584	39.957	36.615	38.089	35.547	37.644	38.225	41.647	41.047	39.241	NaN	39.402
	39.494	38.386	41.155	39.821	40.469	41.722	40.432	41.286	41.327	40.104	34.999	40.317	34.278	37.419	33.225	36.267	35.236	41.427	40.537	37.978	NaN	39.286
	39.338	37.555	41.697	39.916	39.715	41.81	40.204	41.079	42.951	39.317	38.104	41.128	36.687	36.94	34.226	37.889	37.478	40.893	40.934	38.897	NaN	38.897
	39.313	37.944	42.191	40.009	40.075	41.846	40.39	40.66	42.359	39.047	37.655	41.099	34.084	37.519	37.621	36.662	36.257	40.764	40.345	39.636	NaN	39.047
	39.859	38.946	41.618	40.54	40.549	42.088	40.399	39.798	43.076	40.911	35.147	40.702	34.23	36.774	38.355	37.419	36.918	40.133	40.123	38.521	34.774	39.453
	39.945	37.865	41.348	36.839	39.746	40.921	40.29	40.549	41.518	39.698	34.376	39.889	38.092	36.632	37.62	36.744	35.394	41.34	40.575	39.881	NaN	40.365
	38.55	38.616	41.732	39.059	40.08	41.445	39.989	39.937	42.859	40.491	34.061	41.418	33.55	38.123	35.988	35.919	33.916	40.849	40.869	40.537	32.897	40.362
	40.273	37.926	41.386	39.483	40.214	42.445	40.058	40.943	42.434	40.305	35.208	40.015	36.262	36.97	36.904	37.942	37.722	40.805	41.404	39.807	NaN	39.72
	41.797	39.146	41.011	40.628	40.098	41.055	40.723	39.602	42.351	39.659	38.482	39.761	35.893	37.262	37.281	37.918	38.357	40.852	40.416	39.606	35.022	37.822
	39.942	38.652	41.078	39.876	40.543	41.055	39.861	40.822	42.505	40.211	36.443	40.404	36.39	37.389	37.279	36.813	36.39	41.505	40.201	39.363	NaN	39.705
	41.217	38.14	42.114	39.094	40.202	41.86	39.192	41.503	42.12	40.297	37.597	40.865	35.552	37.523	35.802	35.686	34.972	41.577	41.355	39.477	NaN	39.088
	40.489	37.291	41.505	41.555	40.823	41.19	40.592	39.488	42.58	40.371	36.299	40.341	35.823	36.666	36.944	37.812	38.447	41.077	40.657	39.463	35.746	39.462
	39.807	39.266	42.223	39.651	39.916	41.282	39.347	40.317	41.556	39.604	37.829	39.983	35.588	37.703	35.015	35.851	37.869	41.058	40.683	38.44	NaN	38.031
	40.058	38.252	40.638	39.598	40.643	42.027	40.082	41.149	42.319	40.118	35.835	39.583	36.109	37.272	36.399	35.825	37.975	41.381	40.589	39.457	NaN	39.471
	38.382	39.819	41.718	38.857	39.758	41.701	40.241	40.88	42.799	40.085	38.336	40.491	36.267	36.84	36.661	36.774	34.707	41.061	40.367	38.919	35.034	39.826
	38.966	39.59	41.524	39.847	39.086	41.615	39.599	40.121	41.913	40.389	35.818	40.283	36.357	35.988	38.039	37.405	34.001	41.13	40.192	39.752	34.102	38.686
	39.151	37.855	42.049	40.506	40.209	41.727	39.494	38.993	41.468	39.077	38.774	41.068	37.25	38.792	36.713	34.286	36.879	41.759	41.039	36.013	NaN	39.791
	39.79	35.47	41.438	39.358	39.747	41.295	39.759	38.771	42.629	40.622	32.824	40.123	NaN	37.023	35.894	35.215	37.205	41.531	40.81	39.534	NaN	37.788
	40.485	37.632	42.073	39.302	40.852	41.201	39.254	40.627	NaN	40.669	37.216	40.208	37.984	37.867	34.996	35.566	35.254	41.1	40.986	40.15	35.972	39.56
	37.602	38.783	42.077	39.349	41.232	41.446	39.862	41.174	41.932	39.937	36.458	39.705	37.268	36.197	38.429	37.909	37.705	41.373	40.854	37.495	NaN	40.684
	38.718	39.841	41.343	40.766	40.865	41.534	39.455	40.424	42.647	40.064	37.689	40.392	33.723	37.715	35.748	34.202	36.136	41.166	40.628	39.55	32.515	37.945
	40.247	39.193	41.25	39.93	41.794	39.924	39.918	40.886	41.821	40.633	36.803	39.15	35.99	37.475	36.724	36.648	36.158	40.828	39.904	38.318	33.292	40.659
	36.133	38.787	41.891	39.954	40.099	42.462	39.405	40.107	42.618	40.451	36.042	40.474	34.14	38.324	36.779	36.715	38.95	40.982	40.762	40.986	NaN	39.384
	37.69	37.718	42.009	40.243	40.754	41.866	38.937	41.439	NaN	40.071	38.628	39.706	33.118	38.378	37.786	37.119	37.638	41.78	40.523	40.332	NaN	39.999
	41.068	39.139	41.015	39.549	41.026	41.343	40.094	41.009	NaN	40.125	34.805	40.914	36.231	37.748	38.031	33.955	37.783	40.624	40.442	40.211	NaN	37.423
	37.694	39.086	41.312	41.005	40.689	41.421	40.363	39.98	42.458	39.776	31.551	39.426	35.318	37.497	36.753	36.933	37.436	40.555	40.878	40.171	38.027	39.573
	40.009	37.985	40.579	40.381	39.588	42.227	38.375	39.746	NaN	40.533	35.987	40.331	33.865	37.748	35.95	32.901	37.673	40.85	40.287	38.497	34.413	40.393
	39.214	39.291	42.303	41.025	40.681	41.054	39.661	40.775	41.62	40.876	NaN	40.76	36.878	37.594	35.925	35.365	37.384	40.788	41.024	39.475	38.396	37.469
	38.87	38.634	41.9	40.065	40.973	41.935	40.082	40.435	42.558	40.442	35.336	39.991	34.769	37.938	37.112	36.911	37.973	41.352	40.413	35.623	33.489	38.259
	38.951	38.424	41.262	39.432	40.788	40.846	39.715	39.991	42.545	39.346	37.737	40.036	36.658	37.143	36.406	34.739	37.524	41.078	39.1	39.429	NaN	39.56
	40.837	38.157	41.863	40.79	41.096	42.077	39.603	40.574	42.519	41.086	35.578	41.071	34.982	37.648	36.232	33.979	36.353	41.108	40.697	39.644	34.677	38.941
	41.119	39.773	40.798	40.068	40.833	41.533	39.22	40.224	42.337	40.507	37.846	40.14	36.502	37.704	NaN	NaN	37.808	41.309	40.304	38.69	NaN	36.967
	38.1	37.599	41.26	39.813	39.816	41.343	39.838	41.061	42.096	40.399	35.679	39.888	37.188	38.054	36.457	35.583	38.377	41.574	40.136	39.834	NaN	38.204
	39.745	39.611	41.325	41.258	40.321	41.343	39.291	40.299	42.484	39.616	37.069	40.22	37.802	37.538	36.428	38.246	35.755	40.99	41.03	39.146	NaN	40.062
	40.758	36.902	41.581	40.719	38.484	42.006	40.115	39.546	42.448	39.178	38.93	40.452	NaN	38.001	37.17	36.463	38.727	41.303	40.424	39.105	NaN	38.836
	39.875	38.831	41.122	40.584	40.678	41.456	40.112	40.68	41.295	41.122	33.953	39.893	37.004	37.968	35.995	36.311	37.621	41.678	40.265	39.556	34.563	37.976
	40.254	37.356	41.593	40.712	40.956	41.459	40.224	39.969	NaN	40.61	35.993	40.163	34.468	36.412	36.926	37.947	38.336	41.298	41.416	39.266	NaN	37.205
	40.734	38.541	40.817	40.399	40.549	42.105	40.028	41.578	42.491	40.694	37.401	39.871	NaN	38.518	37.432	36.993	37.88	40.843	40.535	41.294	NaN	37.766
	37.977	36.076	41.959	40.49	41.164	40.894	40.204	40.19	NaN	40.339	36.242	40.316	38.101	37.561	37.859	36.827	37.782	40.963	40.494	34.589	NaN	39.498
	40.971	38.498	41.757	40.954	39.662	41.715	38.867	41.135	41.705	40.355	34.397	40.1	36.494	37.935	35.971	36.617	36.399	40.266	40.899	35.317	34.156	38.996
	40.7	39.115	41.734	38.923	41.247	41.177	40.204	39.88	41.504	40.277	35.181	40.598	36.624	38.167	36.825	37.319	37.538	41.62	40.556	38.289	NaN	39.164
	39.473	38.96	41.743	40.178	40.583	41.664	39.379	40.734	42.897	39.529	36.043	40.146	37.909	37.323	37.332	37.936	36.711	41.599	40.585	40.071	35.961	39.454
	40.585	39.366	41.962	39.089	40.349	41.674	39.708	39.235	42.276	40.207	37.654	40.73	37.703	37.384	34.061	36.75	38.581	40.208	40.493	39.889	NaN	37.931
	38.611	36.382	41.545	39.538	40.454	41.406	38.524	39.546	42.07	40.688	32.345	40.933	34.068	37.083	35.662	37.24	38.198	41.817	40.354	38.692	NaN	39.269
	40.283	38.292	41.35	41.033	40.387	41.288	39.216	40.791	42.849	39.409	37.115	40.087	34.683	37.702	36.681	35.766	37.278	41.469	40.666	38.933	32.692	39.817
	40.444	39.375	41.91	39.677	40.431	40.626	40.606	40.133	41.356	40.214	NaN	39.364	34.845	37.944	35.927	35.379	38.164	40.74	39.492	41.026	NaN	39.217
	39.805	39.527	40.387	40.299	40.979	41.533	39.397	40.561	42.174	41.34	37.742	39.875	32.605	38.219	36.022	37.732	36.65	40.999	40.995	39.772	38.766	39.156
	40.163	36.786	40.479	40.129	40.87	41.74	39.765	40.713	42.518	40.582	35.613	39.937	36.572	37.698	35.966	37.383	38.387	41.712	38.728	39.652	34.932	39.499
	38.701	40.114	42.049	41.536	40.734	40.607	39.185	40.679	42.21	40.786	35.724	40.523	34.791	37.486	38.585	36.437	36.684	41.184	40.227	39.283	35.576	39.731
	40.494	37.621	42.025	40.262	40.391	41.475	39.448	40.083	41.421	40.435	36.867	40.065	34.882	36.98	32.923	34.324	38.835	41.121	39.635	40.083	33.841	39.807
	40.68	36.918	41.826	40.323	40.417	42.058	39.941	40.655	42.381	40.161	36.082	39.405	35.178	37.737	35.411	38.046	37.757	41.242	40.575	40.782	NaN	39.995
	40.556	38.579	40.677	40.617	40.588	41.641	40.971	41.134	NaN	39.213	33.003	40.82	36.193	38.07	37.403	37.345	36.518	41.797	40.167	40.319	31.455	39.262
	38.941	38.877	41.947	41.015	40.414	41.41	40.39	40.887	41.374	41.062	36.326	39.296	33.73	37.142	36.13	37.831	38.524	40.944	39.469	39.109	NaN	38.846
	39.147	39.855	41.646	41.113	41.184	41.675	39.917	41.833	42.778	39.997	36.265	40.28	33.353	38.101	36.046	37.034	34.057	41.059	41.206	39.213	36.462	38.299
	40.022	38.868	40.629	40.361	41.351	42.18	39.94	39.974	42.355	40.386	38.681	39.137	NaN	38.417	37.733	36.449	38.755	41.285	40.28	40.503	35.718	37.018
	39.836	39.793	41.409	40.949	40.628	41.387	39.501	40.361	NaN	40.005	NaN	39.771	35.517	37.088	37.608	37.33	37.232	40.386	40.198	38.921	NaN	39.101
	38.168	39.658	41.315	39.982	39.548	41.283	39.465	40.318	42.004	40.237	38.924	40.554	35.947	37.415	33.486	37.005	36.895	41.036	40.141	39.71	33.535	40.476
	38.98	38.213	41.068	37.883	39.648	41.536	39.971	40.611	41.809	38.722	35.049	39.65	34.369	38.022	36.065	37.683	37.499	41.33	40.276	39.219	NaN	39.799
	37.984	40.149	41.598	39.091	39.797	41.057	40.669	39.326	42.488	40.72	35.541	41.093	31.143	37.876	38.28	37.983	38.824	40.006	40.951	39.782	NaN	37.99
	38.007	38.61	40.854	39.011	40.456	42.087	39.967	41.798	42.12	40.401	36.266	40.758	36.935	37.225	37.453	37.856	37.497	41.497	39.937	37.813	NaN	39.352
	40.391	38.425	41.395	39.6	41.04	41.566	40.38	39.596	42.137	40.616	37.042	39.88	35.198	37.128	36.419	36.173	37.424	40.234	40.883	38.985	NaN	38.646
	40.324	38.371	42.19	39.366	41.273	41.616	39.697	40.269	NaN	40.385	38.014	40.101	33.862	37.009	NaN	34.158	36.001	40.944	40.586	39.629	33.54	38.41
	39.471	38.063	40.505	39.105	41.397	42.168	40.276	40.718	42.402	40.652	36.641	40.146	37.111	36.284	38.115	38.274	36.956	41.997	41.021	40.975	NaN	37.826
	41.278	38.499	41.374	39.23	40.27	41.312	38.807	39.954	41.864	40.745	NaN	41.08	35.288	38.144	37.527	36.136	37.037	40.305	41.298	40.683	36.241	39.552
	39.422	39.617	42.218	40.498	40.701	41.622	38.892	40.403	42.656	40.965	34.572	40.539	NaN	37.909	37.029	37.343	37.346	40.848	41.029	40.977	NaN	37.218
	40.737	38.51	41.662	40.824	40.853	41.726	40.003	39.321	42.733	40.257	37.763	40.789	34.872	35.445	33.717	37.837	37.369	40.519	40.938	39.457	NaN	39.297
	39.87	38.176	42.123	38.529	40.611	40.966	39.951	40.048	41.587	39.114	36.331	39.696	33.699	37.262	38.084	35.623	38.23	41.505	40.735	38.784	32.176	39.161
	37.376	38.041	42.125	37.572	40.493	41.025	40.208	41.147	NaN	40.09	39.283	40.485	37.857	37.472	37.631	38.592	36.498	41.446	40.509	39.887	NaN	38.654
	39.336	39.533	41.215	39.451	41.106	41.261	40.329	38.704	42.598	38.963	37.704	40.46	34.311	38.375	38.665	NaN	38.327	41.301	40.17	37.703	NaN	39.234
	39.624	39.816	41.37	38.885	41.068	41.383	39.197	41.414	42.585	39.868	38	40.84	36.058	37.776	37.671	33.596	35.844	40.985	41.054	39.109	31.881	39.888
	39.905	38.553	41.081	38.814	40.842	41.373	39.372	40.899	43.114	40.328	34.057	40.646	36.646	38.282	37.126	36.833	38.247	41.394	40.605	39.988	NaN	39.127
	40.488	37.645	41.392	41.19	40.971	41.826	39.917	40.244	42.623	40.976	35.122	40.235	37.644	37.339	34.249	37.81	36.249	40.904	40.164	40.158	NaN	39.785
	40.728	40.156	41.495	39.138	41.061	41.555	40.091	39.579	43.052	40.927	37.422	39.901	37.41	38.589	36.304	35.776	37.319	40.334	40.718	38.942	NaN	39.311
	40.142	38.733	41.652	40.78	40.66	42.173	40.054	40.178	42.482	41.303	35.57	39.639	37.083	38.594	36.097	36.806	36.826	40.982	40.154	39.582	36.627	37.991
	40.272	38.815	41.168	37.567	40.944	41.49	40.092	41.27	43.155	40.23	36.011	39.474	33.462	37.723	37.085	36.976	38.124	41.005	41.107	40.022	NaN	39.686
	40.113	37.68	41.357	40.722	41.241	41.505	40.27	40.405	42.119	39.011	37.179	40.471	35.185	37.092	37.395	35.066	36.927	41.284	40.245	39.497	31.955	39.793
	38.959	38.605	41.305	38.112	41.285	42.175	39.889	40.465	42.379	40.698	36.727	40.626	36.918	37.472	37.492	32.154	33.266	41.242	41.005	37.772	37.495	39.706
	39.751	37.784	42.123	38.788	39.08	42.436	40.148	39.524	42.641	40.296	34.598	38.87	33.64	37.934	38.712	37.331	38.072	41.729	40.92	40.293	34.311	39.818
	39.721	39.547	40.834	41.525	39.595	41.375	39.169	41.425	NaN	40.922	38.622	41.045	35.239	37.572	36.054	38.375	39.025	41.176	39.836	39.932	35.18	39.515
	40.384	38.133	41.739	40.437	40.767	41.309	40.205	40.167	42.334	40.372	36.211	39.879	36.316	37.158	36.525	37.767	36.508	41.576	40.03	38.387	NaN	38.662
	39.085	37.564	41.509	41.285	40.269	41.405	40.106	41.028	42.757	41.119	36.687	39.917	NaN	37.208	36.895	34.918	38.528	40.521	39.909	39.588	NaN	37.984
	38.764	38.67	41.889	38.902	40.013	42.127	40.364	40.351	41.983	40.204	35.556	39.558	34.795	37.757	34.253	35.181	36.785	41.107	40.39	39.755	NaN	38.8
	39.164	38.087	42.169	40.252	40.846	41.311	39.793	39.817	41.943	40.921	35.51	40.12	37.085	37.286	34.627	38.333	38.249	41.021	40.844	40.4	NaN	38.255
	39.544	39.349	41.316	40.582	40.124	42.002	40.044	39.938	43.091	39.699	37.295	40.418	32.574	37.209	35.862	38.002	36.91	41.294	39.707	40.148	35.05	39.312
	39.238	39.145	40.999	40.578	39.154	41.775	40.529	40.377	42.398	40.312	37.551	40.417	32.528	37.042	37.955	36.61	37.229	41.58	40.506	39.715	NaN	39.343
	41.215	39.507	41.67	40.221	40.19	41.375	38.571	40.141	41.438	39.711	36.648	40.861	36.175	37.378	37.546	37.944	37.375	40.646	40.832	39.348	NaN	38.777
	41.02	39.848	42.024	39.588	39.353	41.205	39.046	40.9	42.564	40.174	NaN	40.693	32.919	38.339	36.953	35.576	34.577	41.29	40.695	39.456	36.451	38.86
	41.226	39.546	40.704	38.925	40.766	41.709	39.857	38.098	NaN	40.32	37.69	39.421	37.257	37.938	31.62	35.614	35.825	41.591	40.81	40.966	NaN	39.031
	40.309	38.952	41.972	40.704	40.444	41.604	38.914	41.06	42.317	40.22	37.359	41.235	31.093	35.358	35.98	34.314	36.566	40.837	40.061	39.295	NaN	37.527
	40.667	37.068	41.477	38.855	40.575	41.612	40.377	40.418	41.817	40.353	38.432	41.048	35.164	37.537	38.26	37.759	35.364	40.979	40.366	38.652	NaN	38.975
	39.244	38.098	42.238	40.146	39.804	41.585	39.58	38.81	41.441	40.194	NaN	39.898	33.134	36.96	32.843	37.335	37.389	40.455	40.642	40.719	NaN	39.272
	36.537	37.473	41.598	40.504	40.618	41.632	39.987	40.556	NaN	38.684	36.601	41.114	34.778	36.567	37.452	36.344	38.047	41.014	40.866	39.07	36.774	39.717
	40.834	38.196	42.417	40.761	40.049	41.895	39.754	39.649	42.476	40.773	38.658	39.577	35.856	37.598	36.915	37.671	34.903	40.721	40.607	38.561	NaN	38.467
	39.797	39.889	41.634	40.429	40.612	40.965	40.437	41.294	42.749	40.834	32.969	40.925	34.075	37.261	33.395	36.394	35.919	41.835	39.45	39.35	NaN	40.396
	40.894	37.095	42.175	40.391	40.447	41.495	40.52	39.867	42.867	40.527	37.926	39.851	35.341	37.824	36.979	37.064	36.036	39.832	41.499	38.473	NaN	38.23
	40.463	40.044	41.017	39.059	40.316	41.438	40.222	39.885	41.982	40.107	36.214	40.317	31.856	37.286	32.011	37.94	36.382	40.291	40.257	40.164	NaN	38.719
	39.301	39.176	42.06	40.676	41.166	42.108	39.105	40.243	41.976	40.017	35.713	40.706	38.112	37.041	38.075	37.649	38.703	40.189	39.763	38.787	35.919	39.997
	39.838	36.739	41.76	39.6	40.117	41.983	40.546	40.356	NaN	40.072	36.572	39.729	35.223	36.286	35.514	36.674	37.153	41.152	40.355	40.221	NaN	40.12
	39.943	37.937	41.02	38.362	40.754	41.743	40.444	40.159	42.123	39.853	38.963	39.892	35.455	37.896	36.507	38.612	36.75	41.457	40.548	38.977	NaN	38.642
	38.756	38.668	41.898	39.792	39.852	41.943	39.978	40.74	42.234	40.569	NaN	40.497	35.498	37.843	37.736	37.658	37.426	41.406	40.358	39.855	NaN	37.48
	40.067	38.295	41.18	41.242	40.287	41.902	40.577	38.406	42.457	40.629	35.774	40.234	37.203	37.815	35.642	37.615	38.114	40.349	40.773	39.391	NaN	38.065
	38.527	38.759	41.084	38.403	40.882	41.202	40.027	38.583	42.127	40.997	37.355	40.491	37.535	37.602	34.487	37.348	38.921	40.88	40.273	39.246	36.307	38.204
	39.449	36.756	41.998	40.766	40.438	41.94	38.924	41.225	42.766	39.978	37.827	40.359	35.892	37.308	37.453	33.687	37.818	41.303	40.5	39.69	NaN	38.813
	39.572	38.619	42.439	40.616	39.939	41.547	40.245	41.01	42.154	39.772	35.117	40.223	35.172	38.338	38.287	36.743	37.119	40.407	41.097	39.811	35.848	39.046
	39.009	36.844	42.109	40.25	40.863	41.782	39.843	40.144	41.775	40.366	36.516	39.991	37.298	37.344	34.349	36.82	34.827	41.308	40.305	38.724	NaN	39.751
	39.512	39.334	41.559	39.277	40.258	42.188	38.894	40.891	41.93	39.648	35.701	40.759	36.884	37.398	36.92	37.603	37.011	40.771	40.4	38.258	NaN	39.703
	39.958	38.332	42.319	38.793	40.646	40.955	39.635	39.123	42.303	39.301	38.433	40.374	35.517	37.993	36.413	36.049	37.337	40.313	40.573	37.506	NaN	39.46
	40.263	38.471	42.358	40.322	40.923	41.17	39.962	39.619	42.176	40.564	37.127	40.627	37.012	37.852	37.52	35.312	37.155	41.156	40.703	40.326	NaN	38.368
	38.409	39.399	41.544	40.815	39.776	41.877	38.588	40.405	42.264	40.409	34.385	39.973	37.832	37.478	38.479	35.005	37.175	41.171	40.981	39.181	33.878	38.258
	36.304	38.587	41.006	40.696	40.175	41.297	40.502	40.361	42.836	41.317	37.85	39.831	34.725	37.711	36.803	38.215	36.145	40.792	39.535	40.987	NaN	39.545
	40.851	37.58	40.934	40.218	39.304	41.396	39.116	38.19	42.257	40.187	35.349	40.368	36.787	37.218	34.441	36.328	36.622	40.882	40.578	39.482	NaN	39.845
	41.058	38.489	42.024	38.88	39.418	42.422	39.912	41.298	41.913	40.576	37.616	40.038	37.783	36.883	33.462	37.004	39.369	40.472	40.786	38.376	NaN	38.114
	40.293	39.647	41.724	38.86	40.856	41.594	40.766	41.418	41.766	41.325	37.716	39.647	37.307	37.865	38.497	37.508	38.328	41.178	39.668	39.198	31.774	37.851
	41.336	39.395	42.438	40.904	40.836	40.809	40.121	39.731	NaN	41.075	38.281	40.5	33.108	38.689	34.09	38.089	35.968	41.108	40.462	39.017	36.952	39.558
	39.431	38.542	41.553	38.952	41.075	41.962	40.028	41.027	42.366	40.688	37.322	40.462	36.627	36.652	38.069	36.054	37.961	41.575	40.832	39.55	33.45	39.24
	39.428	38.797	41.286	39.456	40.898	41.434	39.495	40.195	43.059	41.258	35.885	39.401	36.213	36.923	37.246	34.86	37.801	41.451	40.047	40.876	NaN	39.605
	39.263	40.003	41.649	41.635	40.005	41.624	40.404	41.068	41.67	39.866	35.557	40.981	36.918	37.634	35.674	35.734	37.474	41.48	40.48	38.493	NaN	40.283
	40.203	39.491	42.112	40.753	41.107	41.686	40.389	40.348	41.688	39.426	34.81	40.142	37.051	37.582	36.909	36.103	37.037	42.179	40.131	39.387	NaN	38.255
	40.519	38.555	42.056	40.374	40.218	41.91	39.92	41.451	41.69	40.007	37.585	40.598	35.244	37.419	38.04	37.26	36.509	41.049	40.679	40.38	35.506	36.87
	36.348	39.478	42.567	39.963	39.172	41.178	39.187	40.23	41.803	40.762	37.716	40.51	36.793	37.982	37.173	37.538	38.629	41.176	40.961	36.386	37.267	38.574
	40.161	37.394	41.478	39.444	39.854	40.73	40.066	39.547	41.881	40.206	35.115	40.402	36.264	38.45	36.695	NaN	39.079	41.092	40.445	32.661	37.402	40.018
	40.915	38.081	42.25	40.345	40.977	40.913	39.942	41.339	43.077	40.436	36.751	40.475	35.85	38.664	38.154	34.056	35.298	41.721	40.758	36.663	31.484	38.101
	40.477	39.727	42.027	40.061	40.863	41.077	40.626	40.779	41.769	40.769	35.852	39.7	35.893	37.169	37.351	36.107	38.747	41.695	40.454	38.021	NaN	39.39
	39.945	40.595	41.799	39.404	39.93	41.393	40.176	40.364	NaN	39.515	33.097	40.346	35.335	36.761	33.613	36.144	37.201	41.476	40.343	37.871	33.451	37.915
	37.558	39.512	41.322	41.248	40.922	41.36	39.871	40.4	42.744	40.057	36.995	40.957	35.532	38.072	37.656	38.495	37.006	41.475	40.721	39.385	33.052	39.484
	39.908	38.965	41.619	41.07	41.01	41.706	39.125	41.217	42.04	39.687	35.522	40.413	35.466	36.056	36.948	38.486	38.13	40.465	40.313	39.743	33.663	36.005
	40.036	35.079	41.215	40.276	40.716	41.292	39.688	40.666	42.293	39.456	37.131	41.217	37.976	35.728	34.058	37.018	37.399	41.067	40.867	40.844	34.609	37.827
	37.806	37.935	42.375	40.291	39.84	41.559	39.59	40.964	42.416	40.005	38.152	41.669	34.151	37.028	37.511	30.901	37.486	41.583	40.567	40.398	36.088	40.505
	39.372	38.285	41.107	39.854	40.79	41.363	40.394	41.004	42.895	40.36	33.746	40.908	36.862	36.423	38.015	37.209	38.149	41.091	39.573	40.04	NaN	40.116
	40.282	37.814	41.58	40.47	40.489	41.738	39.478	40.221	42.79	40.114	37.512	40.337	NaN	37.052	36.717	37.568	38.525	41.424	40.187	38.459	NaN	40.211
	40.152	38.976	40.411	40.401	40.838	42.007	39.931	39.181	42.907	39.435	36.234	40.365	33.091	38.038	38.819	36.737	36.755	41.255	40.739	37.216	NaN	39.338
	38.613	39.229	42.096	40.072	40.834	41.069	40.535	40.93	41.948	40.639	35.763	40.44	35.68	37.387	38.195	36.715	37.716	41.381	40.598	38.979	32.358	38.837
	40.45	38.001	41.458	39.532	40.324	41.483	40.343	41.555	42.689	39.87	33.322	40.23	35.62	36.309	38.52	37.091	37.183	40.766	40.267	40.327	38.016	38.106
	40.176	38.921	42.051	38.851	40.873	41.775	39.208	40.6	42.926	40.639	35.568	40.579	37.99	36.407	35.196	36.049	33.569	41.465	40.279	39.436	36.075	39.418
	39.958	39.171	41.948	41.237	40.442	41.768	38.704	40.04	42.921	40.289	36.38	40.379	32.468	37.584	36.581	37.555	38.775	41.904	40.734	39.965	NaN	38.944
	37.908	38.315	42.418	38.069	40.667	41.492	40.198	39.293	41.658	39.464	35.789	39.799	37.06	37.606	37.461	37.704	35.074	41.567	40.458	39.654	34.799	39.933
	40.443	38.886	41.801	38.082	40.593	40.921	39.495	39.782	42.429	40.621	34.548	40.35	32.697	37.44	37.317	34.588	37.818	40.939	40.262	40.068	35.208	40.695
	40.672	38.173	42.48	39.291	40.154	41.914	39.881	39.128	42.953	40.505	35.64	40.669	36.462	38.319	34.944	37.118	36.457	41.701	40.691	40.352	NaN	39.785
	41.53	38.88	41.336	39.345	40.06	42.098	39.782	39.858	42.608	40.352	35.066	41.377	35.044	37.414	37.884	32.702	33.081	41.218	40.077	39.813	34.708	38.654
	37.179	39.923	41.964	40.259	40.037	41.986	39.001	40.764	42.719	40.28	35.195	40.221	35.211	37.405	33.05	35.009	38.239	41.288	40.418	40.219	NaN	38.617
	37.555	38.641	41.976	39.468	40.672	41.649	40.221	39.338	41.297	39.141	37.191	39.804	NaN	36.99	34.082	35.972	37.514	41.654	40.071	35.842	NaN	39.072
	38.168	38.87	41.828	40.507	40.977	41.783	40.435	40.388	42.906	39.786	34.695	39.764	37.258	37.321	35.805	37.345	38.132	41.058	40.581	39.473	NaN	37.982
	38.66	38.751	41.553	39.01	40.962	41.566	39.36	39.739	42.107	39.633	39.285	39.259	37.288	37.855	37.144	37.296	39.258	40.468	41.08	39.084	NaN	40.15
	39.839	37.985	41.852	39.613	40.771	41.291	40.338	40.644	42.094	40.237	38.039	40.731	34.96	36.857	38.156	34.571	36.058	41.632	39.724	40.892	NaN	39.563
	40.589	38.078	41.928	40.516	39.917	41.587	40.216	41.246	41.793	41.211	34.847	40.687	37.614	37.784	37.291	37.341	34.16	40.698	40.233	41.096	32.11	38.063
	38.631	39.717	41.622	38.684	40.948	42.006	39.727	40.648	41.906	40.317	34.132	39.639	36.766	38.213	37.836	36.142	36.671	41.241	39.755	39.701	34.796	38.771
	40.826	38.885	42.259	38.844	40.984	41.23	40.343	41.249	42.186	40.519	38.107	41.063	33.402	38.543	36.199	38.694	36.153	41.678	40.256	37.47	NaN	39.292
	39.583	39.307	41.316	39.938	40.196	42.075	39.286	40.355	42.54	40.63	35.718	39.764	33.513	37.553	36.692	33.789	38.807	41.412	40.193	39.627	NaN	38.969
	40.67	38.736	41.65	39.762	41.299	41.38	40.695	40.686	42.576	40.449	35.076	40.21	32.567	36.065	36.87	34.513	39.006	40.76	40.831	37.246	36.119	38.748
	40.855	38.336	42.219	39.951	40.989	41.801	40.253	40.499	41.981	40.282	33.951	40.382	35.3	37.079	35.245	37.649	35.128	41.245	40.637	39.766	34.733	40.086
	38.091	39.268	41.422	39.149	40.807	40.616	40.239	41.12	42.87	40.842	37.027	41.156	36.918	37.806	37.062	36.879	38.827	41.217	39.39	40.544	NaN	39.151
	40.73	37.923	40.557	39.723	40.882	41.719	40.63	39.92	42.228	41.081	33.946	40.149	37.364	37.368	36.809	36.642	39.198	41.639	41.093	40.415	34.688	39.014
	41.187	36.41	41.315	40.278	39.428	41.609	40.107	39.76	41.674	39.629	35.204	40.721	36.088	36.61	38.269	38.468	38.612	40.914	39.083	40.138	NaN	39.306
	41.003	37.98	41.12	39.633	40.046	40.84	39.162	39.632	40.666	40.059	NaN	39.775	33.713	38.972	37.521	34.549	37.47	41.708	40.952	40.993	36.474	39.854
	39.729	36.902	41.98	40.707	40.182	40.673	40.133	40.274	42.826	40.531	NaN	41.097	34.713	36.774	37.543	34.455	38.123	41.243	40.69	40.381	NaN	39.678
	41.124	38.159	41.3	40.4	40.791	41.583	40.224	40.41	41.811	40.554	37.254	40.904	33.935	37.342	35.231	35.967	36.843	41.144	40.947	40.317	NaN	39.016
	40.978	39.889	41.764	38.863	40.267	40.513	38.97	40.702	42.072	39.445	33.513	40.31	36.649	37.755	38.204	38.303	37.644	41.308	39.151	41.211	33.35	39.07
	39.579	38.666	41.39	40.893	41.403	41.865	40.326	41	42.531	40.851	38.149	39.55	NaN	37.825	34.719	32.818	36.615	41.432	39.592	39.222	NaN	38.553
	38.131	40.587	41.793	39.308	41.279	42.155	39.186	39.676	41.971	39.976	36.716	40.294	37.324	37.769	37.448	33.773	34.286	41.292	41.032	40.407	NaN	40.44
	39.344	37.107	41.864	40.315	40.743	41.359	39.837	40.664	42.421	41.051	38.561	40.58	36.964	36.724	36.047	36.196	NaN	41.689	40.635	39.033	NaN	39.207
	40.748	40.132	41.014	39.307	40.282	41.936	39.291	40.785	42.753	39.536	36.659	40.967	37.92	38.318	33.585	36.548	36.273	40.804	40.867	39.792	NaN	37.646
	40.386	37.854	42.31	39.706	40.859	40.726	39.031	40.619	42.829	40.889	37.412	40.687	34.478	38.106	33.842	38.511	38.847	41.234	41.052	40.716	NaN	39.424
	37.903	40.064	41.59	39.037	40.754	41.959	40.148	40.23	42.74	41.05	36.09	40.236	35.393	38.594	35.882	35.465	37.32	40.989	40.271	40.257	34.149	38.892
	39.335	38.941	42.141	40.779	40.257	41.061	39.874	40.092	NaN	40.905	37.551	40.176	33.839	37.289	36.428	37.285	38.148	39.897	40.845	40.578	36.39	37.937
	39.065	36.139	41.55	40.224	40.091	41.776	38.603	40.805	42.293	40.683	36.908	40.258	34.516	37.092	37.871	34.8	38.887	40.625	40.232	39.482	NaN	40.444
	39.783	38.464	41.915	39.526	40.708	42.117	38.918	40.324	41.632	39.286	36.359	40.559	NaN	37.28	36.163	37.542	37.417	41.513	40.419	35.979	35.262	37.905
	40.797	38.997	41.31	40.371	41.456	41.694	38.619	39.996	NaN	39.804	35.61	39.945	33.206	37.595	37.882	37.835	38.028	41.559	41.058	39.471	NaN	39.019
	41.177	39.496	41.904	41.161	40.633	41.739	39.641	40.06	42.199	40.861	35.776	40.245	33.889	36.341	35.687	38.201	37.802	40.909	41.02	39.495	32.255	39.127
	39.24	37.685	42.336	40.484	41.235	41.588	39.62	40.108	41.649	40.786	NaN	41.233	33.734	38.525	36.36	36.271	37.001	42.158	39.819	39.419	NaN	38.752
	39.334	39.065	42.052	40.928	40.936	42.194	40.208	40.354	42.312	39.624	37.32	40.878	37.059	37.54	34.567	35.297	36.644	41.234	40.275	39.66	NaN	39.793
	40.13	37.826	42.217	40.252	40.794	40.982	40.366	39.25	42.612	40.532	37.246	41.165	37.168	38.449	33.485	35.169	35.638	40.796	41.085	40.414	NaN	39.811
	39.591	39.089	40.788	39.441	41.148	41.346	39.711	38.18	41.664	40.158	36.182	39.908	35.302	37.536	36.299	36.016	38.418	41.007	40.292	37.842	36.347	40.031
	39.876	39.016	40.01	39.895	39.979	41.983	39.989	39.492	NaN	40.653	36.256	40.838	36.874	37.897	37.146	37.94	38.176	41.381	40.292	40.201	32.954	39.028
	37.999	38.705	40.869	38.116	40.696	41.824	40.345	40.807	42.281	40.71	37.114	40.085	37.208	37.645	37.588	37.402	38.473	40.75	39.832	40.918	NaN	39.216
	39.433	37.374	41.894	41.357	40.384	41.188	40.053	40.542	42.214	40.756	35.713	40.737	34.043	37.137	32.4	38.133	38.201	41.465	40.285	37.722	32.407	40.04
	37.866	38.397	42.556	39.964	40.928	41.584	40.27	38.848	41.915	40.558	32.804	40.925	35.579	37.363	35.298	37.791	37.065	41.963	40.868	40.244	33.444	38.213
	37.503	40.033	41.639	39.606	40.677	41.688	40.166	40.864	42.324	40.418	37.336	40.753	36.043	37.77	36.563	36.901	38.173	41.139	39.905	39.049	NaN	37.813
	38.276	38.431	41.514	40.366	40.21	42.025	39.751	39.121	42.224	40.107	36.351	40.159	35.988	38.244	37.161	35.754	35.328	41.641	39.736	39.053	NaN	38.856
	40.342	39.055	41.992	37.585	41.038	41.188	40.397	40.623	42.659	39.765	37.301	40.344	33.408	38.112	32.675	35.393	38.374	40.652	40.613	38.511	34.963	39.859
	40.795	37.513	40.845	40.277	41.314	41.996	40.097	39.825	43.172	40.232	38.014	40.278	35.374	37.984	36.91	35.056	35.426	40.855	40.722	37.994	37.552	39.198
	38.989	39.483	42.125	41.042	40.958	41.551	39.962	40.521	42.874	40.171	35.833	40.175	35.462	37.182	36.582	37.11	36.429	40.952	41.133	39.436	NaN	39.126
	39.813	38.17	42.024	38.464	39.833	41.457	39.19	40.966	NaN	40.091	34.493	40.979	36.37	37.79	36.913	36.487	36.353	40.758	39.89	40.912	37.756	39.613
	38.579	38.819	41.018	38.253	40.417	40.88	40.02	40.819	42.171	40.518	37.766	40.017	35.273	38.295	35.042	37.345	38.752	41.397	39.474	40.45	NaN	40.462
	39.889	39.152	41.13	38.103	40.047	41.756	40.151	40.822	42.151	40.414	34.021	40.534	36.394	36.688	31.524	36.974	36.793	41.337	40.955	37.761	NaN	38.957
	40.407	39.555	41.543	38.798	40.075	41.369	40.584	40.995	42.839	40.039	38.076	40.174	NaN	36.316	38.382	37.206	38.368	41.573	41.051	38.96	NaN	38.61
	37.958	37.917	41.676	40.955	41.109	42.01	40.131	40.205	43.146	40.584	34.362	40.901	36.923	36.705	38.751	35.679	33.623	40.84	39.619	39.355	36.023	38.366
	38.903	36.812	41.861	40.197	40.074	41.907	40.428	40.6	42.607	39.616	38.689	40.617	34.752	38.208	36.62	34.007	36.139	41.268	40.361	40.516	NaN	38.55
	40.838	38.579	41.227	39.685	40.498	41.596	40.036	40.171	42.349	39.599	37.387	39.877	36.222	37.453	38.33	36.409	37.948	40.988	40.092	39.604	33.786	39.377
	40.471	37.998	41.07	39.973	39.656	41.132	39.514	40.799	42.889	39.207	36.273	41.34	35.334	35.572	36.382	37.366	36.759	41.565	40.334	40.655	36.463	39.696
	39.334	38.707	41.151	40.607	38.797	41.504	40.673	40.184	42.545	39.545	38.555	39.377	37.312	37.831	37.09	36.047	37.502	40.804	40.982	40.651	NaN	39.352
	40.619	38.53	41.329	39.609	41.267	41.401	40.435	41.232	41.626	40.601	37.013	39.943	37.219	37.222	37.917	37.098	37.903	40.299	40.536	39.861	NaN	37.269
	40.877	37.464	41.278	40.604	40.938	41.832	40.014	40.893	42.176	41.236	37.543	40.763	36.11	37.122	37.925	37.681	37.126	41.751	40.462	39.193	35.389	39.723
	37.423	38.743	41.233	38.211	41.939	41.784	40.383	40.029	42.425	40.984	36.107	39.636	37.092	36.085	34.614	31.928	35.946	40.833	40.037	38.502	NaN	38.77
	40.594	37.472	42.076	40.55	40.478	40.95	40.178	40.485	42.04	38.74	35.782	40.52	37.668	37.307	35.998	36.343	37.523	41.638	40.715	39.968	NaN	38.323
	39.491	38.743	42.114	40.053	40.277	41.45	38.902	40.123	42.806	40.718	36.67	39.591	33.16	38.614	34.88	38.021	33.7	40.876	39.507	38.594	35.084	39.632
	40.251	40.087	42.266	38.548	41.161	41.551	39.039	39.548	42.568	39.778	38.169	40.241	36.454	36.981	35.762	37.095	33.574	40.927	40.037	39.538	NaN	38.162
	39.443	38.577	42.027	40.548	40.112	41.804	38.996	41.361	42.359	40.573	37.713	40.464	34.628	37.65	37.375	33.304	38.866	40.742	40.662	38.544	NaN	38.695
	39.863	36.984	40.982	38.215	40.45	41.095	39.325	40.984	42.914	39.652	36.853	40.862	36.956	36.39	38.126	37.508	37.249	41.05	40.514	39.414	NaN	40.118
	39.402	36.698	41.923	40.211	40.033	41.52	38.857	39.762	42.404	39.742	37.824	40.222	37.934	36.962	38.175	36.753	38.127	41.444	40.893	40.021	NaN	39.565
	40.752	39.056	41.919	40.372	41.022	40.834	39.319	40.506	42.209	40.201	33.878	39.944	34.903	38.11	35.619	38.482	37.294	39.816	40.135	39.691	NaN	38.266
	39.473	37.4	41.179	39.45	40.434	41.934	40.353	41.453	42.471	40.354	38.069	40.514	36.838	35.908	36.836	35.607	34.461	41.42	40.93	40.018	NaN	37.936
	38.958	37.294	41.29	39.329	41.335	41.941	39.298	40.186	41.466	38.55	36.734	39.806	37.524	37.979	37.784	35.937	35.87	40.885	39.521	40.012	NaN	39.853
	40.728	39.16	42.046	39.663	39.922	41.933	40.01	41.198	42.792	39.588	38.316	39.376	35.161	36.913	37.337	38.032	37.233	40.794	39.978	39.377	NaN	39.571
	40.835	37.662	41.865	39.701	40.892	41.408	40.58	40.715	42.843	40.455	37.591	40.372	36.859	38.149	37.514	37.533	34.712	40.869	40.606	38.552	36.797	38.495
	38.533	39.792	41.862	41.527	40.356	41.937	39.874	40.475	42.335	40.673	36.151	40.295	35.661	37.952	NaN	36.182	34.754	41.861	40.304	38.324	34.503	37.875
	40.377	39.165	41.881	39.496	40.881	40.753	39.973	39.618	42.333	40.488	37.022	40.238	35.344	37.517	37.046	37.808	38.14	40.944	40.657	40.596	NaN	38.353
	38.187	38.215	42.353	38.698	40.443	41.557	39.09	40.988	42.488	40.018	36.065	39.621	36.996	37.525	35.692	37.08	35.043	41.045	39.382	40.997	NaN	37.892
	39.7	37.862	41.988	41.088	41.019	42.13	40.784	40.035	42.875	40.445	34.751	40.368	34.21	37.565	36.649	33.549	32.429	41.147	40.861	39.382	NaN	39.789
	39.326	38.943	41.754	41.014	40.742	41.183	39.349	39.653	42.192	40.094	37.334	40.679	34.59	37.533	38.494	38.638	30.888	41.619	40.919	37.933	NaN	40.296
	38.5	39.12	42.246	39.288	41.419	41.826	40.149	41.045	42.202	38.818	36.804	39.874	35.282	38.877	36.217	35.481	34.973	40.993	40.673	40.149	NaN	39.486
	41.387	36.474	41.489	39.805	41.237	41.309	40.38	40.183	42.863	40.061	36.629	40.621	33.771	37.459	35.737	37.765	38.949	40.542	40.57	40.133	35.9	39.597
	39.967	35.724	41.241	38.771	40.792	40.969	40.206	40.257	42.621	40.966	35.723	40.524	NaN	37.782	32.419	37.737	36.429	40.599	40.211	34.489	35.946	39.406
	40.031	39.165	41.556	40.367	40.913	41.444	39.348	39.662	42.035	40.219	37.661	40.242	31.754	37.924	34.219	38.208	33.501	41.398	40.618	39.822	NaN	40.363
	38.914	39.023	41.563	41.029	40.284	41.416	40.471	40.373	42.041	40.756	37.605	41.577	36.946	37.848	37.118	33.973	37.242	40.683	40.871	39.311	NaN	39.454
	40.975	36.119	41.042	39.354	40.723	41.21	39.451	39.58	42.913	40.258	35.889	40.877	35.295	37.883	34.068	36.411	36.046	41.22	40.348	40.142	34.627	40.526
	40.113	39.643	42.048	41.462	41.409	41.175	39.085	39.682	42.423	40.182	33.911	40.264	35.207	36.258	37.917	37.354	35.478	40.874	41.139	40.351	35.521	38.927
	40.161	36.317	42.071	41.447	40.636	41.975	39.407	40.08	42.189	39.818	35.724	40.667	35.045	37.857	34.375	33.679	38.103	40.044	40.136	36.741	34.991	39.619
	38.984	37.549	41.787	40.569	40.511	41.224	39.957	40.776	42.559	40.801	38.451	39.925	35.761	37.72	31.664	34.432	36.46	41.48	40.697	38.974	33.824	39.201
	38.559	36.585	41.667	40.121	40.877	42	38.964	41.376	42.275	39.755	36.11	39.743	36.887	36.976	38.178	32.696	34.914	41.143	41.252	38.519	NaN	40.248
	40.985	37.908	41.043	39.999	41.237	41.508	39.682	39.586	41.816	40.768	36.648	40.258	NaN	37.444	36.438	37.438	38.27	40.601	39.992	37.944	33.305	39.875
	40.5	38.853	42.22	40.203	40.468	41.112	40.276	40.956	NaN	41.135	34.443	40.33	35.963	38.055	37.291	36.717	36.252	40.921	40.499	40.246	NaN	39.001
	39.461	37.739	41.483	39.749	40.598	41.59	40.171	41.38	41.877	40.474	37.272	40.496	35.297	37.34	37.045	37.36	36.852	40.498	40.208	39.843	35.644	39.654
	39.179	39.406	40.976	41.23	39.939	41.482	39.802	40.828	42.637	40.332	32.359	41.041	38.565	38.068	37.062	37.479	36.633	40.535	40.688	39.094	32.491	38.774
	37.809	39.52	41.811	40.663	40.633	41.33	39.909	40.892	42.687	40.353	37.294	40.471	36.901	37.509	35.379	37.191	37.067	41.11	40.414	39.264	NaN	38.352
	40.594	35.951	41.511	41.017	40.022	41.258	40.213	37.797	NaN	40.882	NaN	39.004	36.547	37.862	37.217	38.971	37.288	41.254	40.244	40.151	NaN	40.454
	36.166	38.897	41.204	40.891	39.593	41.643	39.356	40.39	42.317	39.865	37.678	40.351	37.606	36.989	36.772	35.405	38.352	41.783	40.456	39.774	31.615	40.272
	38.417	38.138	42.11	40.192	40.812	41.539	40.224	40.159	NaN	40.301	37.576	39.967	36.746	37.704	36.74	33.735	33.023	41.388	41.028	39.713	35.068	39.63
	39.99	37.626	42.113	40.338	41.053	40.858	40.004	41.346	42.982	40.501	37.647	40.846	34.624	38.191	36.825	36.43	37.569	41.044	40.124	38.817	NaN	38.728
	40.092	38.959	41.534	40.327	39.986	41.396	40.365	40.795	42.051	40.952	33.734	40.482	37.612	38.125	36.709	37.708	37.373	39.892	40.682	39.137	37.028	39.114
	39.402	38.654	41.131	40.463	39.474	41.972	40.354	39.632	42.216	40.917	34.786	40.444	34.352	38.415	33.398	36.594	36.166	39.494	41.307	39.042	NaN	39.771
	40.36	38.715	41.818	40.211	40.616	41.48	39.932	40.651	42.115	39.909	36.092	40.991	35.351	37.714	34.768	34.951	38.352	40.691	40.348	40.214	32.795	36.605
	38.632	36.52	41.153	40.648	39.718	42.327	38.856	40.393	42.125	39.509	33.113	39.583	36.439	37.266	38.4	38.1	37.5	40.661	40.521	40.715	36.587	37.396
	40.968	40.065	41.721	38.301	40.401	41.926	40.475	40.025	41.103	41.271	38.72	40.445	34.943	38.162	36.741	37.983	37.43	40.636	40.417	38.866	NaN	39.942
	38.264	39.148	40.95	40.947	40.82	41.649	39.256	40.534	42.564	41.161	36.43	40.724	37.393	35.897	32.367	35.277	38.35	40.599	40.571	40.119	NaN	39.119
	40.128	39.023	41.264	40.272	39.432	42.387	40.512	40.624	42.294	40.105	36.616	40.523	37.409	37.038	33.576	33.537	NaN	41.062	40.243	39.798	NaN	39.031
	37.369	36.945	41.357	40.305	39.904	41.932	39.531	41.393	NaN	39.632	37.319	40.08	34.901	37.072	37.644	36.504	35.671	41.668	40.773	39.333	NaN	37.514
	39.599	39.429	41.679	40.862	40.808	41.634	39.484	41.28	41.455	40.444	NaN	40.178	35.046	36.747	37.395	37.345	35.102	41.683	40.592	39.853	NaN	37.992
	38.575	38.11	41.59	39.082	41.085	40.762	40.088	40.858	42.665	40.243	36.258	41.141	36.483	36.864	37.348	37.637	37.89	40.919	41.092	36.748	NaN	38.484
	39.217	38.236	42.06	39.516	40.355	41.567	39.354	40.963	42.101	40.87	37.388	40.377	34.003	36.226	38.998	35.148	38.017	41.125	39.831	39.162	34.532	39.699
	39.897	38.215	42.095	40.919	41.056	41.385	39.8	38.786	42.573	39.05	37.586	40.566	35.769	36.644	36.691	37.989	37.416	41.022	39.514	37.634	NaN	38.454
	38.81	40.347	41.091	38.97	40.065	42.133	39.296	40.267	42.096	40.729	36.408	40.361	35.574	36.711	37.25	35.467	38.111	42.264	40.431	40.396	NaN	38.621
	39.145	38.969	42.984	40.677	39.906	41.554	39.738	39.586	42.273	40.583	37.859	40.323	34.327	38.596	36.536	37.991	39.11	41.529	39.723	38.868	NaN	39.545
	39.758	37.526	41.891	39.946	39.943	41.952	39.885	40.173	NaN	39.796	36.997	39.525	37.372	37.162	35.715	31.26	37.629	41.086	40.436	40.209	33.677	38.902
	40.635	38.407	41.659	41.248	40.856	41.338	39.469	40.821	42.255	39.271	36.541	40.316	36.027	37.301	36.665	30.694	37.654	40.912	40.305	39.248	31.893	39.013
	40.639	38.28	42.569	40.375	40.771	41.921	38.343	40.69	42.507	40.675	37.672	40.219	33.025	37.879	37.483	37.333	39.566	41.761	40.825	39.285	NaN	36.104
	39.416	39.611	42.113	40.139	40.658	41.085	39.767	41.19	43.077	40.305	33.765	40.723	33.557	37.405	37.884	36.657	32.965	41.121	40.954	38.525	NaN	36.031
	41.098	38.021	41.972	40.004	40.5	41.92	40.097	41.11	42.448	39.857	35.861	40.737	31.759	38.141	36.263	37.427	36.922	40.883	38.925	40.039	NaN	38.736
	40.848	38.068	41.053	40.754	40.6	41.284	39.925	40.183	42.461	40.12	35.341	40.568	37.286	37.742	37.598	37.438	37.91	41.379	41.142	38.8	NaN	37.769
	37.755	37.047	42.617	41.304	40.849	41.253	40.451	38.25	42.388	39.691	36.993	39.952	36.677	37.291	38.313	36.647	37.631	41.317	40.593	39.622	NaN	39.176
	39.225	37.823	41.892	41.439	41.156	40.985	39.379	40.31	40.39	39.517	35.407	40.841	37.314	36.63	35.367	37.201	38.485	40.767	39.977	39.877	NaN	39.955
	36.876	39.116	41.817	39.779	39.87	41.549	40.361	40.218	41.434	40.981	33.474	40.511	35.217	36.302	37.805	36.248	35.281	41.579	40.728	40.645	32.651	40.425
	39.175	39.251	42.668	40.435	40.583	42.025	40.042	41.471	42.358	39.819	36.097	39.502	35.297	37.061	37.816	38.553	37.188	40.777	40.523	37.869	NaN	39.318
	40.266	37.483	41.46	41.016	40.946	41.729	39.221	41.049	41.22	39.864	35.426	40.253	NaN	38.225	37.675	37.946	35.861	40.737	40.224	39.632	32.146	40.418
	37.679	37.961	41.618	40.656	41.049	41.844	40.511	39.426	42.492	40.616	37.549	39.908	33.581	36.703	36.518	36.447	37.591	40.887	40.297	39.33	NaN	39.629
	40.353	37.85	41.38	40.828	40.499	41.054	40.554	40.779	41.929	40.439	35.497	40.845	33.752	37.152	35.436	38.844	37.057	41.374	40.909	38.454	36.019	39.691
	37.217	38.844	40.738	40.194	40.649	41.438	38.751	39.584	42.691	39.956	37.222	39.496	32.675	38.125	36.266	36.408	33.919	41.06	40.935	39.654	NaN	39.79
	38.425	38.85	41.234	40.709	40.079	40.786	40.103	40.469	42.482	39.297	37.982	40.116	35.556	37.449	36.637	37.585	37.511	41.378	41.01	38.701	35.693	39.748
	40.413	35.728	42.358	39.757	40.735	41.637	39.997	40.426	42.034	40.69	NaN	41.366	37.614	37.03	36.442	37.265	35.516	41.011	39.972	39.931	NaN	39.899
	40.56	38.976	41.48	40.196	40.934	40.672	40.206	40.25	42.84	39.959	36	40.584	36.927	37.449	34.165	NaN	39.002	41.023	40.24	36.416	NaN	38.275
	38.239	39.592	42.049	39.275	40.344	42.03	39.199	39.855	41.832	40.208	35.038	40.719	36.935	37.766	35.764	37.536	36.036	41.547	40.335	39.756	NaN	39.409
	39.763	37.936	41.13	40.414	40.845	41.926	40.089	40.965	42.705	40.819	36.108	40.096	NaN	37.765	37.513	35.776	38.618	41.858	40.011	39.712	32.72	37.721
	40.491	39.48	41.79	40.423	39.762	41.443	40.305	40.991	NaN	40.738	38.535	40.211	36.084	37.913	37.512	35.688	38.272	41.073	39.705	39.337	35.108	39.779
	41.202	39.42	41.721	38.791	40.471	40.894	39.047	41.045	42.475	40.748	34.276	41.207	34.631	37.823	NaN	34.512	38.412	42.096	39.145	40.058	35.844	39.708
	34.251	37.865	41.955	40.574	41.036	41.865	40.09	40.787	42.508	40.707	33.345	40.76	NaN	36.754	34.943	35.605	38.629	41.089	41.018	40.16	NaN	40.483
	39.199	39.499	41.113	39.367	41.036	40.697	39.847	41.413	41.401	41.299	38.309	40.994	37.827	37.828	35.368	36.642	37.585	41.352	40.123	39.011	33.718	39.612
	38.146	38.446	41.945	41.139	40.701	41.996	39.28	39.71	42.514	40.172	34.322	40.564	35.442	36.542	37.74	36.257	36.597	41.632	41.187	36.915	NaN	39.076
	40.152	37.643	40.355	39.888	40.072	40.855	39.021	40.242	42.869	38.941	33.96	40.349	32.209	37.47	36.823	35.849	37.44	41.658	41.109	38.393	36.343	38.293
	40.371	39.107	41.211	40.48	41.389	40.981	39.654	38.676	NaN	40.878	35.114	40.192	33.849	37.576	36.937	37.189	37.995	41.397	40.409	39.665	37.39	39.827
	39.948	38.031	41.692	38.64	40.258	40.896	40.144	40.116	42.4	39.24	37.167	40.041	33.537	37.869	37.112	37.488	34.647	41.367	40.079	37.813	NaN	37.741
	37.101	38.384	42.251	39.44	39.634	41.128	39.421	38.129	42.482	39.535	36.009	40.688	35.735	37.143	36.613	36.239	38.418	40.437	40.339	39.851	NaN	39.841
	40.601	36.868	41.127	39.283	40.427	41.433	39.822	41.253	42.303	39.78	37.572	40.199	37.5	36.749	37.29	32.881	37.591	40.198	40.551	39.454	NaN	40.345
	37.347	37.354	41.499	40.185	40.857	41.595	39.579	39.73	41.645	39.311	36.418	40.196	37.233	37.802	34.131	37.528	37.953	41.953	41.207	40.72	33.256	39.205
	40.549	38.737	41.056	40.879	40.102	41.825	39.414	40.258	42.442	40.017	NaN	39.967	34.097	37.51	35.657	38.432	37.247	40.183	39.533	40.243	NaN	38.924
	40.857	36.904	41.377	38.048	40.145	42.148	40.179	40.336	41.477	40.851	36.276	39.846	34.432	37.179	37.628	37.925	38.187	41.176	40.035	38.997	34.598	38.701
	39.582	39.936	40.562	40.692	40.213	41.638	39.294	39.033	41.631	40.72	34.732	40.342	35.747	38.469	35.353	37.927	35.76	41.656	41.135	38.206	34.703	37.909
	38.948	38.442	41.085	40.523	39.896	41.75	40.199	40.926	42.528	40.054	36.001	40.128	35.146	36.166	36.149	35.912	38.948	41.017	40.809	40.501	NaN	38.794
	38.533	38.281	41.775	40.815	41.052	41.478	40.08	38.708	41.416	39.876	36.664	40.969	36.32	37.612	37.499	38.675	33.257	41.215	41.009	39.798	NaN	39.347
	40.371	38.623	41.055	38.759	39.903	41.769	39.409	40.872	41.842	39.535	34.451	39.956	35.183	37.951	35.528	37.867	33.359	41.672	40.603	40.313	NaN	37.436
	39.317	37.638	41.665	41.579	39.982	42.112	40.196	38.832	43.015	40.064	37.706	41.085	36.6	36.42	36.354	34.916	37.746	41.483	41.213	39.53	NaN	38.31
	39.098	37.248	41.649	40.358	40.783	41.619	40.181	40.179	42.322	40.635	36.581	40.346	36.682	36.68	37.712	32.749	37.49	41.08	41.039	41.162	35.871	39.915
	38.57	38.586	42.093	41.352	40.416	41.054	40.508	38.927	42.688	40.316	33.598	40.765	36.007	38.026	36.94	38.045	36.684	40.725	41.305	39.361	36.398	40.423
	40.546	38.423	42.013	41.395	40.333	41.888	40.508	40.957	41.47	40.177	37.759	40.493	35.539	37.118	35.493	38.076	38.692	41.936	40.496	38.581	NaN	40.181
	40.693	37.868	41.764	40.617	40.173	42.489	39.859	40.647	42.297	40.512	36.747	40.101	36.319	36.256	38.456	35.279	39.287	41.682	39.708	39.264	37.629	39.84
	37.98	37.779	42.193	40.402	40.221	41.763	39.208	40.426	42.386	40.101	34.844	40.603	37.358	35.928	37.741	32.48	35.043	40.791	40.224	39.079	NaN	39.241
	40.725	38.467	41.325	40.323	40.915	41.091	38.607	40.35	42.259	40.714	36.845	40.99	36.067	36.81	34.901	36.512	35.979	41.48	40.729	39.93	NaN	37.322
	39.314	39.728	41.583	39.466	40.049	41.168	39.983	39.92	42.401	40.582	33.403	40.023	35.494	35.943	37.551	37.89	38.351	41.414	39.987	38.887	NaN	38.806
	38.978	39.481	41.293	38.351	39.624	41.276	40.253	40.271	43.1	40.175	34.514	39.601	36.874	37.033	36.608	37.266	37.637	40.871	40.677	37.099	32.893	39.787
	40.944	38.883	41.67	40.207	41.052	41.777	39.93	39.628	41.543	39.727	36.942	40.962	NaN	37.261	37.038	36.121	36.966	41.587	40.25	35.443	35.594	39.561
	39.359	39.355	41.292	40.31	40.416	41.022	40.198	39.97	42.677	40.909	36.28	40.699	33.184	36.729	37.821	35.51	NaN	41.237	41.164	38.853	NaN	36.814
	39.571	37.382	42.133	40.628	40.291	41.566	39.483	40.239	42.801	40.736	36.194	40.216	35.844	37.958	37.479	36.642	36.73	40.874	40.424	38.539	NaN	39.599
	40.271	37.182	41.309	38.434	39.929	41.996	39.443	40.386	41.968	40.355	35.745	41.244	33.877	38.264	36.008	38.309	33.086	40.919	41.135	41.032	36.746	40.042
	40.187	37.933	41.336	40.947	40.601	41.015	38.745	39.965	42.371	40.876	35.523	40.617	NaN	37.581	37.575	37.462	33.956	41.6	40.381	39.378	NaN	40.068
	40.996	38.718	41.836	40.337	39.76	42.065	40.602	39.524	42.997	41.019	35.912	40.608	37.498	37.781	36.836	37.188	36.673	40.365	39.979	39.194	NaN	38.513
	39.35	38.652	41.339	38.621	40.049	41.085	39.699	39.954	42.71	39.793	36.232	40.531	34.151	37.456	38.291	33.419	38.73	41.361	40.352	39.397	NaN	39.159
	41.182	39.046	40.562	40.637	41.081	41.651	38.914	40.811	42.687	40.335	34.977	39.839	34.567	36.893	NaN	38.401	38.101	41.897	40.813	40.245	NaN	39.221
	37.236	36.925	41.167	40.075	41.232	41.207	40.527	41.692	41.408	41.298	34.172	40.261	36.766	37.491	34.321	36.056	37.402	40.739	40.52	38.662	36.174	39.189
	39.386	38.95	42.425	40.989	39.753	41.786	40.387	39.744	42.34	39.787	37	40.656	35.136	37.166	37.659	33.213	36.399	41.662	40.558	40.503	33.442	38.45
	40.781	37.4	40.658	40.947	40.463	41.725	40.5	40.245	42.126	40.052	36.432	40.98	38.515	37.795	37.522	35.061	35.24	40.305	39.547	39.856	NaN	38.243
	41.069	39.386	41.973	40.333	40.619	41.968	39.936	39.832	42.451	39.707	37.341	40.156	36.46	37.85	36.668	38.143	36.237	40.612	40.542	40.258	32.538	39.401
	39.789	38.824	42.218	39.748	41.018	41.254	39.378	38.856	41.491	39.83	32.837	40.565	35.291	37.83	35.609	35.741	38.608	40.321	40.286	40.958	NaN	38.836
	39.516	39.199	40.926	39.93	40.077	41.302	39.128	40.236	42.249	40.268	37.728	40.971	37.129	38.089	34.912	32.795	38.14	41.406	40.388	41.028	NaN	39.922
	39.532	38.653	41.866	38.311	41.515	40.585	39.398	41.04	42.189	40.828	35.003	40.928	36.156	38.704	37.113	35.18	35.499	41.591	40.754	39.381	33.904	40.226
	40.515	39.571	41.045	39.414	40.077	41.889	39.819	40.352	42.374	39.697	37.778	39.595	33.243	36.544	36.383	37.995	35.645	41.511	41.225	40.573	NaN	38.719
	41.519	40.172	42.748	40.948	40.584	41.848	39.832	39.227	42.855	39.895	35.333	40.152	37.681	36.364	37.334	33.183	38.592	41.444	40.913	38.509	NaN	40.026
	38.474	39.699	41.539	38.561	41.181	40.751	39.582	39.518	42.489	39.938	36.37	40.29	NaN	38.185	36.356	37.883	36.191	40.963	40.455	38.911	NaN	38.983
	39.217	39.307	41.876	40.671	39.668	42.161	40.046	40.281	42.586	40.781	35.885	40.843	38.549	38.015	37.427	39.03	35.657	41.083	40.285	40.405	NaN	39.661
	40.044	37.742	42.216	39.393	40.591	40.546	39.8	40.664	43.026	40.212	36.554	40.594	33.358	36.787	31.672	38.049	37.878	41.29	40.686	40.762	33.216	38.51
	39.784	38.621	41.755	39.71	40.007	41.808	40.256	40.118	42.768	40.252	38.087	40.663	36.941	36.458	37.204	33.499	35.463	39.234	40.757	40.028	NaN	40.013
	40.674	39.306	41.386	39.263	39.38	40.089	39.68	40.236	42.072	40.073	33.739	40.874	37.366	37.903	34.684	35.252	37.042	41.59	40.629	39.644	NaN	38.673
	39.751	38.976	41.512	41.009	40.588	41.343	39.899	40.825	42.597	39.775	35.026	41.382	36.846	37.006	36.848	36.914	37.664	41.455	40.224	39.429	NaN	40.61
	41.015	39.051	40.744	39.449	40.288	41.958	39.391	40.341	42.399	40.431	36.28	40.529	36.455	37.126	36.341	36.182	37.323	41.979	41.06	35.271	NaN	39.461
	40.763	37.171	42.189	39.274	40.549	41.994	40.275	39.508	42.791	40.258	38.16	40.625	34.351	38.461	36.898	37.052	37.787	41.941	40.847	39.518	NaN	37.636
	39.458	40.012	41.001	40.22	40.533	41.847	39.075	40.579	42.932	40.107	35.388	40.039	35.076	37.593	35.936	37.207	38.572	41.111	40.484	38.378	NaN	40.372
	40.38	35.531	41.379	39.446	40.31	41.395	40.144	39.63	43.035	40.801	37.565	40.161	35.907	37.529	36.796	NaN	36.269	41.012	39.81	39.633	NaN	37.455
	41.15	37.013	42.083	39.761	41.072	41.354	40.055	41.265	42.961	40.248	37.643	40.709	36.589	37.149	37.508	38.042	36.456	41.453	40.782	37.883	NaN	40.06
	39.894	38.8	40.76	39.936	40.327	41.236	39.922	39.301	42.108	39.277	37.701	40.882	36.98	37.366	35.948	35.152	37.214	40.792	41.049	40.738	NaN	39.626
	38.377	38.704	42.317	40.165	40.442	41.535	40.474	40.977	42.601	40.359	37.807	40.631	36.394	36.948	38.289	37.527	37.037	40.953	40.144	40.325	34.231	38.636
	38.615	39.23	41.988	41.213	40.839	41.8	39.545	39.517	42.912	41.365	35.878	40.207	36.85	37.134	36.298	36.235	35.556	41.087	41.321	39.445	32.182	37.694
	40.338	37.471	42.027	41.696	40.671	41.509	40.437	40.534	41.598	40.648	36.538	40.091	34.872	37.787	34.957	36.833	38.884	41.01	40.303	40.66	35.847	38.424
	37.955	38.06	41.911	40.994	40.355	40.626	40.532	39.47	42.214	39.405	34.665	40.415	34.919	37.356	38.239	37.236	38.41	41.119	40.565	38.636	NaN	40.157
	40.261	37.407	41.871	35.756	40.684	41.81	38.939	40.811	42.276	40.708	35.73	40.415	36.053	38.043	36.008	34.505	37.991	41.549	40.544	38.927	31.944	40.548
	40.723	36.982	41.525	41.199	40.37	41.635	39.427	40.081	42.69	40.636	38.638	39.928	35.801	37.406	37.408	34.064	37.711	41.704	40.44	40.072	35.834	39.616
	39.976	37.457	41.334	40.536	39.831	42.082	39.872	40.834	41.869	39.75	36.889	40.026	36.696	37.704	37.294	38.157	36.936	41.488	40.095	40.132	NaN	37.918
	37.043	37.992	40.641	40.684	40.737	41.922	39.439	40.521	42.237	39.953	NaN	40.242	35.688	36.67	36.614	36.486	38.681	41.911	39.897	37.171	35.135	40.918
	37.009	37.668	41.599	40.544	40.041	40.775	40.697	38.549	42.87	40.511	38.081	40.251	32.145	37.255	36.924	37.531	37.594	41.066	40.989	39.975	35.111	39.831
	40.033	39.701	41.984	38.416	41.075	41.703	39.541	39.489	41.584	40.451	34.682	39.681	33.787	36.19	36.677	37.93	37.046	40.842	39.983	39.783	33.946	38.602
	38.954	39.738	41.322	40.479	40.362	42.097	39.885	39.72	42.7	40.77	32.869	40.141	35.982	37.682	38.178	37.296	38.792	41.108	40.213	40.288	32.568	39.219
	39.296	38.736	42.136	39.995	40.531	42.015	39.638	40.831	42.328	40.154	35.953	40.739	34.202	38.199	36.68	37.501	36.91	41.769	40.302	39.01	34.061	37.802
	39.895	39.669	40.952	40.056	40.018	41.914	40.572	41.152	42.414	40.045	36.771	39.421	36.479	38.032	36.35	33.476	38.499	41.147	40.708	41.266	NaN	38.999
	40.377	38.487	41.217	37.787	41.053	41.969	39.508	41.728	41.519	40.53	33.459	40.384	35.889	37.88	34.451	35.726	37.962	40.426	39.294	39.872	35.703	38.282
	39.395	39.638	40.576	40.685	40.885	41.807	39.25	39.694	42.706	40.94	38.332	40.675	37.286	38.732	35.859	37.037	38.489	40.785	40.763	40.033	NaN	38.921
	38.117	39.817	41.62	40.185	40.674	41.764	39.335	40.004	41.942	39.457	34.293	40.762	35.192	37.118	35.048	37.877	37.365	40.795	40.855	38.206	34.898	38.752
	39.181	38.721	41.522	39.673	40.229	40.488	39.261	40.075	42.067	40.006	35.396	40.138	36.562	37.405	37.079	36.149	37.095	40.714	40.73	39.34	38.135	40.288
	40.646	38.975	41.481	38.77	40.809	41.405	38.751	40.612	42.836	40.703	37.362	40.182	34.26	37.845	37.309	38.154	37.536	41.161	40.421	39.57	NaN	39.429
	40.307	39.532	42.159	40.249	40.752	41.231	40.881	40.026	42.261	40.314	NaN	41.333	35.663	37.507	37.28	37.351	37.679	41.225	40.247	38.776	NaN	40.521
	40.085	38.803	41.848	40.868	40.651	41.012	39.064	41.644	42.157	39.747	36.712	40.477	33.327	37.72	37.596	37.309	39.042	41.554	40.148	33.546	36.739	39.639
	39.896	39.533	41.744	39.065	40.66	41.578	40.483	39.855	42.234	40.794	35.731	41.222	36.149	36.995	37.828	36.513	34.57	41.316	40.478	40.001	NaN	39.858
	40.295	38.312	42.298	41.083	40.722	42.086	40.41	40.844	43.027	40.364	36.438	40.045	35.611	37.647	37.133	37.839	37.892	40.829	40.624	37.617	NaN	40.35
	37.439	38.872	42.034	39.355	40.569	41.758	38.587	40.008	42.194	40.779	37.929	39.301	35.952	37.162	35.146	37.406	37.891	41.398	40.5	40.507	NaN	39.067
	38.092	39.769	42.055	39.67	40.533	41.406	38.946	39.867	41.213	39.555	37.331	40.851	37.117	37.88	37.426	37.911	37.293	41.66	40.455	40.551	35.077	39.684
	40.631	38.88	42.078	40.235	40.387	41.634	40.231	40.802	NaN	40.373	36.04	39.46	34.796	37.291	37.006	37.776	32.506	41.408	40.755	40.328	34.848	38.816
	39.514	36.853	40.647	39.887	40.365	40.991	40.263	40.845	42.96	40.504	37.625	40.246	37.573	37.508	33.793	32.046	36.781	41.005	39.801	39.425	NaN	38.141
	39.318	38.412	41.431	41.523	40.333	41.902	40.071	40.949	41.901	39.311	34.815	40.005	35.302	37.777	37.875	35.497	35.272	41.218	41.326	38.912	36.882	39.731
	39.473	38.777	42.008	40.48	41.482	42.15	39.174	41.314	42.583	40.067	34.488	40.065	35.699	37.373	36.775	33.337	39.47	41.568	40.635	38.247	NaN	40.082
	39.91	39.079	40.972	40.224	40.787	41.423	40.319	40.479	42.158	40.537	38.011	40.433	33.45	37.244	36.963	36.434	34.531	41.122	39.709	39.852	35.424	39.151
	40.416	38.766	41.657	40.322	40.535	41.955	38.917	40.627	42.326	39.872	33.608	40.365	36.634	38.039	37.454	37.016	37.639	41.603	40.894	40.417	NaN	36.743
	40.106	37.443	41.313	40.816	40.548	40.968	40.593	41.289	42.872	39.667	33.479	40.167	33.055	38.805	36.886	36.63	31.902	41.458	39.222	39.397	NaN	39.949
	41.144	39.337	42.044	39.008	39.649	41.687	40.089	40.732	NaN	40.398	37.87	40.838	38.204	37.122	38.191	34.427	35.031	41.519	40.686	38.101	NaN	39.78
	40.623	39.012	40.851	39.032	40.929	40.954	39.247	40.918	42.751	40.676	35.178	40.871	37.068	36.343	36.959	35.416	37.171	41.253	40.512	37.404	33.775	39.906
	41.29	39.334	41.477	40.211	40.717	41.374	39.979	38.805	41.529	40.124	36.854	40.206	36.048	38.139	35.229	38.927	38.33	40.449	40.154	39.753	NaN	39.673
	40.276	40.398	41.676	40.822	41.197	41.547	39.755	40.124	42.593	41.081	35.681	40.226	36.732	38.302	35.857	37.004	37.481	40.757	40.092	39.885	31.384	39.846
	39.917	36.717	42.151	40.985	41.035	41.561	39.406	41.694	42.87	40.41	32.901	40.281	36.971	37.785	34.499	38.044	36.639	40.541	41.318	40.151	NaN	39.944
	39.646	38.07	42.062	39.839	40.082	41.999	39.895	40.772	42.185	40.217	35.773	40.553	37.07	37.991	37.073	37.151	35.511	41.267	40.414	39.723	34.349	37.972
	39.047	37.837	41.842	38.341	40.946	42.002	39.449	40.747	42.263	40.03	37.433	40.466	37.3	37.154	37.872	34.695	37.726	41.317	40.525	40.162	32.201	39.23
	39.101	38.977	41.18	39.103	40.498	41.765	39.879	39.325	42.626	40.649	37.644	40.54	38.427	38.54	36.296	37.247	38.498	41.41	39.932	39.694	34.615	40.181
	39.784	39.45	41.888	41.965	40.583	41.591	40.261	39.409	42.642	40.317	33.902	39.369	33.477	37.939	37.733	35.976	37.321	41.389	39.917	38.244	35.319	39.869
	40.793	38.922	40.473	39.788	40.111	41.96	40.351	40.594	41.722	39.85	37.325	39.994	33.515	37.293	37.09	37.755	36.623	40.257	40.575	37.423	NaN	39.463
	40.923	38.428	40.341	39.353	40.167	41.727	39.606	39.612	42.008	40.428	36.871	41.375	36.664	37.127	35.75	NaN	35.225	40.881	40.729	39.355	NaN	38.537
	39.746	39.973	41.424	39.98	39.935	40.605	39.809	39.672	42.067	40.928	32.513	39.883	36.017	38.051	36.758	37.374	35.957	41.731	40.935	38.313	NaN	36.526
	40.443	38.001	41.82	39.093	41.483	41.062	39.635	39.913	42.096	39.622	37.23	39.886	35.718	38.088	36.258	36.339	37.221	40.647	40.217	40.184	NaN	39.878
	38.865	38.946	42.549	38.88	40.414	41.558	39.887	40.767	42.127	41.586	37.41	40.271	35.258	37.761	38.501	37.691	38.238	41.228	40.314	39.042	NaN	39.124
	39.775	37.413	41.732	40.942	40.802	41.734	40.293	40.735	41.758	40.128	36.252	40.292	37.03	36.907	37.359	37.667	35.315	41.49	40.513	39.594	36.025	40.183
	36.986	37.569	40.61	39.856	40.821	41.157	39.954	40.611	NaN	40.089	35.939	40.867	36.518	37.71	37.911	36.87	36.009	42.059	40.476	40.621	NaN	39.925
	40.684	38.147	41.513	40.723	40.568	41.355	40.01	41.416	42.051	40.116	34.524	39.989	37.558	36.938	37.418	35.893	38	40.597	40.82	39.288	NaN	40.851
	39.834	37.829	41.284	40.889	40.388	40.915	40.252	41.559	NaN	40.802	34.273	39.859	35.146	37.465	37.088	36.126	35.127	40.922	41.375	37.88	NaN	36.858
	38.737	38.23	41.585	39.013	40.617	41.289	40.068	39.749	41.705	39.823	33.594	40.636	36.547	38.327	37.695	37.569	34.906	41.739	40.188	35.168	33.524	38.504
	39.359	37.665	41.161	37.504	40.266	41.187	40.434	40.394	42.198	40.737	32.829	41.021	35.216	37.814	36.419	35.355	35.792	41.862	39.936	38.876	37.627	38.191
	39.955	37.49	41.965	41.019	40.089	41.872	40.04	39.89	41.766	41.274	37.476	41.01	35.826	38.531	37.217	34.346	38.388	40.998	40.289	40.474	35.027	38.391
	39.127	38.973	41.274	39.783	41.266	41.25	40.109	38.915	42.135	39.508	38.419	40.535	36.195	38.036	36.758	35.494	37.865	40.481	40.966	38.864	NaN	40.27
	39.795	39.277	42.155	41.131	40.618	41.822	39.837	40.335	41.501	40.538	36.815	40.11	34.601	37.849	33.419	36.39	37.353	41.672	40.824	40.504	NaN	40.155
	41.475	36.91	41.57	40.879	39.675	41.914	40.403	40.631	42.207	40.643	36.258	40.589	35.752	38.031	35.147	35.638	37.075	40.812	40.595	38.961	37.209	40.441
	40.024	37.169	40.672	39.757	40.314	41.554	40.959	41.316	41.858	40.504	36.72	40.401	36.839	37.329	35.927	37.227	37.22	40.915	40.33	39.335	NaN	39.013
	39.928	39.115	41.578	40.803	40.3	41.045	39.636	40.925	42.442	40.202	38.202	40.136	35.83	36.773	36.578	36.079	37.288	41.235	39.422	40.219	NaN	37.683
	40.427	38.839	41.1	40.232	40.34	42.036	38.985	41.187	41.864	40.396	37.675	40.731	37.238	36.523	37.849	38.173	36.323	40.946	39.949	39.269	34.073	38.829
	39.941	39.644	40.935	40.58	40.229	42.116	39.38	40.696	42.195	40.493	32.81	39.243	36.393	37.736	37.694	35.023	36.27	41.484	41.011	39.787	38.32	38.639
	41.062	36.808	42.302	40.883	41.036	41.972	39.662	40.363	41.566	40.751	34.981	40.162	36.441	37.737	34.111	36.92	37.431	41.35	39.219	38.701	NaN	39.249
	37.77	37.01	41.117	39.554	40.59	41.567	39.723	40.532	42.345	40.951	35.447	40.88	33.436	37.873	38.32	37.904	38.703	41.391	40.088	35.064	NaN	39.1
	37.808	37.433	41.13	38.76	39.159	40.244	39.743	41.582	42.769	40.522	36.814	40.526	36.338	36.871	32.467	37.388	38.185	40.912	40.709	35.166	32.757	39.551
	40.678	38.813	41.789	40.765	40.104	41.175	39.373	40.037	41.591	40.004	35.317	40.522	36.956	37.983	36.219	37.665	36.404	42.155	40.617	38.968	NaN	39.39
	40.838	38.985	41.805	39.23	40.486	41.562	39.384	39.785	42.637	40	37.105	40.277	35.772	36.872	35.53	37.413	36.659	40.932	39.896	38.739	33.256	39.3
	40.042	38.3	41.644	40.635	40.959	41.438	38.757	40.974	42.09	40.242	35.096	41.069	34.676	37.813	34.636	36.768	37.698	39.285	40.606	39.885	NaN	39.375
	39.872	39.237	41.681	39.788	40.595	40.568	39.924	40.909	43.078	41.326	36.734	38.955	37.361	37.471	38.318	37.521	34.942	40.45	39.526	41.035	NaN	40.143
	39.521	40.366	41.804	39.95	39.506	41.455	40.092	40.527	42.326	40.183	36.567	41.01	36.611	37.502	34.86	35.449	37.183	40.452	40.793	39.86	34.432	39.147
	37.942	39.388	41.127	39.507	40.101	41.555	38.755	40.803	42.248	40.795	36.124	41.278	34.988	36.072	37.87	37.156	35.722	41.313	41.668	39.726	NaN	38.51
	39.892	39.094	41.517	39.39	41.238	42.582	39.853	40.821	NaN	39.41	37.084	40.297	37.606	37.73	38.414	35.012	36.899	41.665	39.338	39.002	NaN	39.786
	41.474	39.974	41.746	40.436	40.185	41.813	40.407	40.974	43.067	38.992	37.18	39.926	33.829	36.932	36.963	36.857	37.418	40.777	39.79	39.632	NaN	39.578
	39.803	35.956	41.6	38.986	41.138	41.562	38.965	40.229	41.651	40.948	36.549	40.549	37.177	37.877	37.243	37.224	38.344	40.846	40.45	40.282	34.017	39.681
	40.336	37.635	41.859	39.434	40.212	41.255	38.898	39.648	42.784	41.413	33.407	38.898	33.55	37.94	34.701	36.776	34.888	41.467	40.819	38.379	NaN	39.221
	39.724	39.289	41.183	39.199	40.856	40.7	40.136	40.961	42.339	40.216	33.506	40.576	35.291	37.037	35.869	38.165	36.971	40.278	39.53	37.802	NaN	38.094
	40.202	38.11	42.179	39.362	41.4	41.288	39.207	39.642	42.236	40.827	37.067	40.616	36.628	38.258	33.322	37.52	37.651	41.028	39.662	36.578	NaN	40.131
	39.538	39.459	42.165	38.711	40.154	41.531	40.158	40.586	41.759	40.407	37.766	40.76	35.253	37.704	38.225	37.778	37.276	41.517	40.399	39.784	35.648	37.152
	38.411	38.408	40.548	40.312	39.671	41.143	39.752	40.102	42.549	40.033	32.854	38.612	34.274	36.312	36.531	37.528	36.29	41.163	39.198	40.504	NaN	37.044
	39.826	38.74	42.036	40.909	40.624	41.572	39.913	39.649	42.854	40.319	37.508	40.644	36.242	36.847	37.593	37.523	33.95	40.686	39.661	39.342	31.924	40.203
	40.374	39.208	41.646	41.166	40.928	41.57	40.559	40.195	42.24	40.739	37.086	40.558	37.318	37.542	36.598	37.377	36.395	40.732	40.047	40.789	NaN	40.307
	37.075	38.546	42.053	41.155	41.091	41.828	38.861	40.207	41.523	41.002	33.95	39.778	36.178	37.987	37.596	36.791	39.008	41.691	40.359	40.483	NaN	39.286
	39.526	36.493	41.644	40.42	39.83	41.727	39.325	40.299	42.284	39.323	38.618	39.424	36.192	37.991	37.283	37.029	36.291	40.842	39.98	39.264	NaN	39.176
	41.324	37.815	41.119	40.464	40.081	41.888	39.481	39.363	42.656	40.174	39.486	40.597	36.517	36.551	34.78	35.188	34.079	41.311	40.525	40.223	NaN	37.473
	39.51	39.167	40.77	40.087	39.854	41.563	40.255	39.399	41.921	40.586	34.066	40.869	35.51	38.081	38.541	38.059	37.357	40.361	40.608	36.594	NaN	39.281
	39.546	37.636	42.377	40.693	39.794	42.052	39.815	39.98	42.232	40.031	37.709	41.015	36.984	37.76	36.957	37.533	36.482	40.812	40.302	39.483	NaN	39.789
	41.003	34.594	42.211	40.303	40.739	41.692	39.393	39.764	42.639	41.18	36.658	39.249	36.701	37.995	34.064	35.615	38.067	40.513	40.787	39.216	NaN	39.504
	40.917	37.928	42.296	39.92	39.822	42.139	39.468	40.769	NaN	38.954	34.676	40.401	34.407	36.971	37.83	35.982	35.267	41.033	39.969	39.526	36.07	38.503
	39.746	37.347	41.765	39.943	40.197	42.036	40.181	40.241	42.779	41.086	36.526	39.846	32.634	36.72	36.75	37.884	36.2	41.215	40.063	40.824	35.177	38.995
	36.87	39.618	42.195	40.376	40.888	41.182	39.521	41.32	42.999	40.671	34.546	39.73	35.828	36.619	35.568	33.731	NaN	41.505	40.423	40.415	NaN	39.641
	40.81	39.91	41.263	41.62	39.745	41.919	40.26	40.421	42.317	40.741	37.052	39.146	33.75	37.492	36.327	33.463	36.628	41.274	40.655	39.733	34.807	40.66
	39.42	39.717	41.704	40.44	40.295	41.342	38.7	40.149	42.726	40.759	34.813	40.278	32.572	37.651	38.006	37.641	NaN	41.51	40.73	38.36	NaN	39.899
	38.314	38.887	42.09	39.098	40.874	41.682	39.015	41.315	41.936	39.772	NaN	40.295	33.247	38.642	35.814	34.516	36.341	41.633	40.185	39.739	37.247	39.404
	39.374	38.421	41.818	40.247	40.085	42.133	39.578	41.458	42.018	40.415	37.34	40.692	32.223	37.065	36.771	36.83	37.413	40.767	41.162	36.769	31.727	39.708
	40.421	38.998	40.903	40.964	40.527	41.76	39.43	39.767	42.756	39.062	34.126	40.626	34.457	37.319	37.741	34.549	36.297	41.326	40.382	38.153	NaN	39.344
	41.136	39.041	41.41	38.692	40.4	41.803	40.674	40.174	42.65	40.086	38.872	39.683	36.073	38.259	38.618	34.781	37.888	40.698	40.489	39.504	34.171	37.889
	41.014	39.404	41.306	40.273	39.547	41.432	40.068	39.633	41.893	40.393	36.769	40.776	35.242	37.118	36.538	36.495	37.366	41.362	40.056	40.148	NaN	39.529
	41.129	38.441	42.166	40.841	40.742	40.999	40.168	40.889	42.941	40.409	33.845	40.259	37.275	37.532	37.284	37.762	37.932	41.561	41.002	37.838	NaN	38.892
	40.869	38.261	41.966	40.777	41.195	40.6	39.956	40.8	41.443	40.994	33.074	40.012	34.319	37.302	37.246	36.565	36.859	42.034	40.012	39.386	34.09	37.343
	39.965	39.149	41.408	40.323	41.137	41.468	39.378	40.292	42.65	41.159	35.73	40.235	37.6	37.046	35.031	34.04	38.608	40.853	41.207	40.146	32.559	38.247
[truncated: 8,001 more rows]
